# Supplementary material for: The metabolic core of the prokaryotic community from deep-sea sediments of the southern Gulf of Mexico shows different functional signatures between the continental slope and abyssal plain
Source: PeerJ. 2021 Dec 14;9:e12474. doi: 10.7717/peerj.12474 (PMC8679910; doi:10.7717/peerj.12474)
Supplement: Supplemental Information 1 — The carbonates, particulate organic carbon and terrigenous content of each sample. [file peerj-09-12474-s001.xlsx]

## Sheet: Sheet1
Raw geochemical data
Sample	Maximum depth (m)	Core depth (cm)	Carbonates (%)	Particulate Organic Carbon (%)	Terrigenous (%)
E2	1937	0.5	21.9625	0.779046	75.2585
E7	3569	0.5	29.0358	0.888483	68.0757
E44	3715	0.5	38.0217	0.607134	59.3712
E46	1598	0.5	27.7283	0.865186	69.4065
E47	3559	0.5	38.0375	0.969941	58.9926
