# Supplementary material for: The metabolic core of the prokaryotic community from deep-sea sediments of the southern Gulf of Mexico shows different functional signatures between the continental slope and abyssal plain
Source: PeerJ. 2021 Dec 14;9:e12474. doi: 10.7717/peerj.12474 (PMC8679910; doi:10.7717/peerj.12474)
Supplement: Supplemental Information 2 [file peerj-09-12474-s002.xlsx]

## Sheet: Table I
Supplementary Table I. Geochemical data from sediment cores. Table shows for each sample the maximum samplling depth (m) and core depth (cm) from which
carbonate, organic carbon and terrigenous content was quantified.
Sample	Maximum depth (m)	Core depth (cm)	Contenido de carbonatos (%)	Contenido de Carbono orgánico particulado (%)	Contenido de Terrígenos (%)
E2	1937	0.5	21.9625	0.779046	75.2585
E7	3569	0.5	29.0358	0.888483	68.0757
E44	3715	0.5	38.0217	0.607134	59.3712
E46	1598	0.5	27.7283	0.865186	69.4065
E47	3559	0.5	38.0375	0.969941	58.9926

## Sheet: Table II
Supplementary Table II. Metagenomes statisitics. Table shows for each sample the total number of raw and QC sequences,
Sample	Number of raw sequences	Number of QC sequences	Number of sequences with predicted feature	RNA sequences	Total number od predicted proteins	Predicted proteins with known function	Predicted proteins with unknown function
E2	1583363	1272123	846210	4918	841292	153205	688087
E7	1341160	1084262	746201	7055	739146	143154	595992
E44	1344417	1343345	714969	1757	713212	133683	579529
E46	1948298	1521393	997388	4870	992518	198805	793713
E47	1592467	1285478	856771	2552	844219	158625	685594
Total		6506601

## Sheet: Table III
Supplementary Table III. Microbial community core genes. Genes are listed using their annotation name, SEED-Subsystem affiliation, and the total number of ORFs affiliated are shown.
Name	SEED subsystem	total number of ORFs
function=[Proline racemase (EC 5.1.1.4)]	Amino acids	38
function=[Tryptophanase (EC 4.1.99.1)]	Amino acids	323
function=[Homoaconitase (EC 4.2.1.36)]	Amino acids	10
function=[Chorismate mutase I (EC 5.4.99.5)]	Amino acids	159
function=[N-methylhydantoinase (ATP-hydrolyzing) (EC 3.5.2.14)]	Amino acids	153
function=[3-isopropylmalate dehydratase large subunit (EC 4.2.1.33)]	Amino acids	2708
function=[Urocanate hydratase (EC 4.2.1.49)]	Amino acids	1059
function=[Pyruvate dehydrogenase E1 component (EC 1.2.4.1)]	Amino acids	3086
function=[NAD-specific glutamate dehydrogenase (EC 1.4.1.2]	Amino acids	157
function=[Homocysteine S-methyltransferase (EC 2.1.1.10)]	Amino acids	38
function=[Glutamate synthase [NADPH] large chain (EC 1.4.1.13)]	Amino acids	6244
function=[Histidinol-phosphatase [alternative form] (EC 3.1.3.15)]	Amino acids	37
function=[Indoleacetamide hydrolase (EC 3.5.1.-)]	Amino acids	45
function=[Methylglutaconyl-CoA hydratase (EC 4.2.1.18)]	Amino acids	162
function=[5-methyltetrahydrofolate--homocysteine methyltransferase (EC 2.1.1.13)]	Amino acids	2880
function=[L-asparaginase]	Amino acids	34
function=[1-pyrroline-4-hydroxy-2-carboxylate deaminase (EC 3.5.4.22)]	Amino acids	50
function=[rk-type]	Amino acids	31
function=[Dihydrolipoamide dehydrogenase of branched-chain alpha-keto acid dehydrogenase (EC 1.8.1.4)]	Amino acids	184
function=[Histidinol-phosphatase (EC 3.1.3.15)]	Amino acids	79
function=[O-acetylhomoserine sulfhydrylase (EC 2.5.1.49)]	Amino acids	473
function=[Methylcrotonyl-CoA carboxylase biotin-containing subunit (EC 6.4.1.4)]	Amino acids	742
function=[N-methylhydantoinase B (EC 3.5.2.14)]	Amino acids	960
function=[LL-diaminopimelate aminotransferas]	Amino acids	21
function=[5-Enolpyruvylshikimate-3-phosphate synthase (EC 2.5.1.19)]	Amino acids	596
function=[Arginase (EC 3.5.3.1)]	Amino acids	69
function=[redicted alternative]	Amino acids	132
function=[issimilatory-type (EC 2.7.7.4)]	Amino acids	232
function=[Homoserine O-acetyltransferase (EC 2.3.1.31)]	Amino acids	455
function=[Probable acyl-CoA dehydrogenase (EC 1.3.99.3)]	Amino acids	127
function=[2-isopropylmalate synthase (EC 2.3.3.13)]	Amino acids	2269
function=[N-acetyl-gamma-aminoadipyl-phosphate reductase (EC 1.2.1.-)]	Amino acids	75
function=[Cysteine synthase A (EC 2.5.1.47)]	Amino acids	21
function=[Glutamine synthetase family protein in hypothetical Actinobacterial gene cluster]	Amino acids	41
function=[Glutamate N-acetyltransferase (EC 2.3.1.35)]	Amino acids	118
function=[Glutamate racemase (EC 5.1.1.3)]	Amino acids	75
function=[Aspartate-semialdehyde dehydrogenase (EC 1.2.1.11)]	Amino acids	1182
function=[Cystathionine beta-synthase (EC 4.2.1.22)]	Amino acids	466
function=[Serine hydroxymethyltransferase (EC 2.1.2.1)]	Amino acids	4372
function=[Proline/sodium symporter PutP (TC 2.A.21.2.1)]	Amino acids	32
function=[Chorismate synthase (EC 4.2.3.5)]	Amino acids	1345
function=[Acetylornithine deacetylase (EC 3.5.1.16)]	Amino acids	211
function=[Agmatinase (EC 3.5.3.11)]	Amino acids	887
function=[Low-specificity L-threonine aldolase (EC 4.1.2.5)]	Amino acids	302
function=[lnN (EC 6.3.1.2)]	Amino acids	311
function=[Diaminopimelate decarboxylase (EC 4.1.1.20)]	Amino acids	574
function=[4-hydroxy-2-oxovalerate aldolase (EC 4.1.3.-)]	Amino acids	164
function=[Not a Proline racemas]	Amino acids	62
function=[Glutamate formiminotransferase (EC 2.1.2.5)]	Amino acids	41
function=[Leucine dehydrogenase (EC 1.4.1.9)]	Amino acids	353
function=[-dioxygenase (EC 1.13.11.11)]	Amino acids	22
function=[Tryptophan synthase beta chain like (EC 4.2.1.20)]	Amino acids	146
function=[Methionine gamma-lyase (EC 4.4.1.11)]	Amino acids	92
function=[Acyl-CoA dehydrogenas]	Amino acids	1647
function=[N-methylhydantoinase A (EC 3.5.2.14)]	Amino acids	1001
function=[Spermidine synthase (EC 2.5.1.16)]	Amino acids	159
function=[Allophanate hydrolase 2 subunit 1 (EC 3.5.1.54)]	Amino acids	34
function=[Carbamate kinase (EC 2.7.2.2)]	Amino acids	46
function=[Cystathionine beta-lyase (EC 4.4.1.8)]	Amino acids	230
function=[Uncharacterized PLP-dependent aminotransferase YfdZ]	Amino acids	107
function=[Phosphoribosylformimino-5-aminoimidazole carboxamide ribotide isomerase (EC 5.3.1.16)]	Amino acids	382
function=[Glutamine synthetase type I (EC 6.3.1.2)]	Amino acids	7214
function=[Putrescine aminotransferase (EC 2.6.1.82)]	Amino acids	44
function=[ufS subfamily]	Amino acids	265
function=[Anthranilate synthas]	Amino acids	2002
function=[3-aminobutyrl-CoA ammonia lyase (EC 4.3.1.14)]	Amino acids	81
function=[Biosynthetic Aromatic amino acid aminotransferase alpha (EC 2.6.1.57)]	Amino acids	326
function=[Threonine dehydratase (EC 4.3.1.19)]	Amino acids	500
function=[2-keto-3-deoxy-D-arabino-heptulosonate-7-phosphate synthase I beta (EC 2.5.1.54)]	Amino acids	392
function=[L-serine dehydratase (EC 4.3.1.17)]	Amino acids	226
function=[4-hydroxyproline epimerase (EC 5.1.1.8)]	Amino acids	172
function=[]	Amino acids	3269
function=[Ketoglutarate semialdehyde dehydrogenase (EC 1.2.1.26)]	Amino acids	96
function=[Serine acetyltransferase (EC 2.3.1.30)]	Amino acids	193
function=[Dihydrodipicolinate synthase (EC 4.2.1.52)]	Amino acids	606
function=[N-carbamoylputrescine amidase (3.5.1.53)]	Amino acids	276
function=[N-acetyl-]	Amino acids	63
function=[Pyruvate-flavodoxin oxidoreductase (EC 1.2.7.-)]	Amino acids	148
function=[acterial (EC 3.5.1.9)]	Amino acids	35
function=[Aromatic-L-amino-acid decarboxylase (EC 4.1.1.28)]	Amino acids	202
function=[Hydroxymethylglutaryl-CoA lyase (EC 4.1.3.4)]	Amino acids	244
function=[Phosphoribosyl-ATP pyrophosphatase (EC 3.6.1.31)]	Amino acids	127
function=[Cystathionine gamma-lyase (EC 4.4.1.1)]	Amino acids	571
function=[Isochorismatase (EC 3.3.2.1)]	Amino acids	1163
function=[2-keto-4-pentenoate hydratase (EC 4.2.1.-)]	Amino acids	66
function=[Butyryl-CoA dehydrogenase (EC 1.3.99.2)]	Amino acids	5982
function=[Histidine ammonia-lyase (EC 4.3.1.3)]	Amino acids	414
function=[Adenylylsulfate kinase (EC 2.7.1.25)]	Amino acids	1393
function=[-dioxygenase (EC 1.13.11.6)]	Amino acids	36
function=[3-hydroxyanthranilate]	Amino acids	46
function=[5-methyltetrahydropteroyltriglutamate--homocysteine methyltransferase (EC 2.1.1.14)]	Amino acids	361
function=[Sodium/glutamate symport protein]	Amino acids	255
function=[3-dehydroquinate synthase (EC 4.2.3.4)]	Amino acids	523
function=[Biosynthetic Aromatic amino acid aminotransferase beta (EC 2.6.1.57)]	Amino acids	257
function=[5''-methylthioadenosine phosphorylase (EC 2.4.2.28)]	Amino acids	700
function=[Sulfate permease]	Amino acids	108
function=[Glutaminase (EC 3.5.1.2)]	Amino acids	125
function=[Threonine dehydratas]	Amino acids	275
function=[Acetolactate synthase large subunit (EC 2.2.1.6)]	Amino acids	4180
function=[Alanine racemase (EC 5.1.1.1)]	Amino acids	226
function=[Predicted 2-keto-4-pentenoate hydratase/2-oxohepta-3-ene-]	Amino acids	101
function=[Aminomethyltransferase (glycine cleavage system T protein) (EC 2.1.2.10)]	Amino acids	1395
function=[Arginine utilization regulatory protein RocR]	Amino acids	64
function=[NADP-specific glutamate dehydrogenase (EC 1.4.1.4)]	Amino acids	1581
function=[Cysteine desulfurase (EC 2.8.1.7]	Amino acids	383
function=[Gamma-glutamyl phosphate reductase (EC 1.2.1.41)]	Amino acids	716
function=[Hypothetical protein Ygg]	Amino acids	77
function=[L-threonine 3-dehydrogenase (EC 1.1.1.103)]	Amino acids	405
function=[(R)-citramalate synthase (EC 2.3.1.182)]	Amino acids	504
function=[Phosphoadenylyl-sulfate reductase [thioredoxin] (EC 1.8.4.8)]	Amino acids	737
function=[Argininosuccinate synthase (EC 6.3.4.5)]	Amino acids	1540
function=[Cyanophycinase (EC 3.4.15.6)]	Amino acids	46
function=[Proline iminopeptidase (EC 3.4.11.5)]	Amino acids	181
function=[Glutamine synthetase type I]	Amino acids	380
function=[Putrescine transport ATP-binding protein PotA (TC 3.A.1.11.1)]	Amino acids	585
function=[Methylmalonate-semialdehyde dehydrogenase (EC 1.2.1.27)]	Amino acids	864
function=[Urease alpha subunit (EC 3.5.1.5)]	Amino acids	1783
function=[Glutamine synthetase (EC 6.3.1.2)]	Amino acids	88
function=[Phenylacetate-coenzyme A ligase (EC 6.2.1.30)]	Amino acids	279
function=[Threonine dehydrogenase and related Zn-dependent dehydrogenases]	Amino acids	254
function=[L-asparaginase (EC 3.5.1.1)]	Amino acids	118
function=[ecreted (EC 3.4.24.3)]	Amino acids	77
function=[Branched-chain alpha-keto acid dehydrogenas]	Amino acids	1173
function=[Kynureninase (EC 3.7.1.3)]	Amino acids	190
function=[Cytosine deaminase (EC 3.5.4.1)]	Amino acids	159
function=[Delta-1-pyrroline-5-carboxylate dehydrogenase (EC 1.5.1.12)]	Amino acids	883
function=[Asparagine synthetase [glutamine-hydrolyzing] (EC 6.3.5.4) AsnH]	Amino acids	138
function=[N-carbamoylsarcosine amidase (EC 3.5.1.59)]	Amino acids	81
function=[Agmatine deiminase (EC 3.5.3.12)]	Amino acids	49
function=[Asparagine synthetase [glutamine-hydrolyzing] (EC 6.3.5.4)]	Amino acids	1341
function=[Imidazole glycerol phosphate synthase cyclase subunit (EC 4.1.3.-)]	Amino acids	1432
function=[0-methylenetetrahydrofolate reductase (EC 1.5.1.20)]	Amino acids	480
function=[Betaine--homocysteine S-methyltransferase (EC 2.1.1.5)]	Amino acids	123
function=[Succinylornithine transaminase (EC 2.6.1.81)]	Amino acids	54
function=[Putrescine transport ATP-binding protein PotG (TC 3.A.1.11.2)]	Amino acids	301
function=[Iron-sulfur cluster assembly scaffold protein IscU]	Amino acids	18
function=[Predicted functional analog of homoserine kinase (EC 2.7.1.-)]	Amino acids	71
function=[Sodium/glycine symporter GlyP]	Amino acids	105
function=[Acetoacetyl-CoA synthetase (EC 6.2.1.16)]	Amino acids	810
function=[Phenylalanine-4-hydroxylase (EC 1.14.16.1)]	Amino acids	76
function=[4-hydroxyphenylpyruvate dioxygenase (EC 1.13.11.27)]	Amino acids	870
function=[roline synthase co-transcribed bacterial homolog PROSC]	Amino acids	86
function=[Aspartate racemase (EC 5.1.1.13)]	Amino acids	29
function=[Pyrroline-5-carboxylate reductase (EC 1.5.1.2)]	Amino acids	199
function=[ABC transporte]	Amino acids	278
function=[Ornithine cyclodeaminase (EC 4.3.1.12)]	Amino acids	156
function=[Glutamine amidotransferase protein GlxB (EC 2.4.2.-)]	Amino acids	432
function=[Isoaspartyl dipeptidase (EC 3.4.19.5)]	Amino acids	33
function=[Diaminopimelate epimerase (EC 5.1.1.7)]	Amino acids	197
function=[Enoyl-CoA hydratase [isoleucine degradation] (EC 4.2.1.17)]	Amino acids	251
function=[NAD-specific glutamate dehydrogenase (EC 1.4.1.2)]	Amino acids	903
function=[Sarcosine dehydrogenase (EC 1.5.99.1)]	Amino acids	1201
function=[D-3-phosphoglycerate dehydrogenase (EC 1.1.1.95)]	Amino acids	1875
function=[Succinyl-CoA:3-ketoacid-coenzyme A transferase subunit B (EC 2.8.3.5)]	Amino acids	215
function=[Tryptophan]	Amino acids	190
function=[eta subunit]	Amino acids	151
function=[3-ketoacyl-CoA thiolase (EC 2.3.1.16)]	Amino acids	2651
function=[3-ketoacyl-CoA thiolase [isoleucine degradation] (EC 2.3.1.16)]	Amino acids	144
function=[Homoserine O-succinyltransferase (EC 2.3.1.46)]	Amino acids	136
function=[Para-aminobenzoate synthas]	Amino acids	425
function=[Predicted transcriptional regulator LiuR of leucine degradation pathwa]	Amino acids	30
function=[-diaminopimelate desuccinylase (EC 3.5.1.18)]	Amino acids	117
function=[-dihydroxyphenylacetate]	Amino acids	24
function=[-dioate decarboxylase (EC 4.1.1.68)]	Amino acids	41
function=[2-amino-3-carboxymuconate-6-semialdehyde decarboxylase (EC 4.1.1.45)]	Amino acids	118
function=[2-aminomuconate semialdehyde dehydrogenase (EC 1.2.1.32)]	Amino acids	45
function=[2-keto-3-deoxy-D-arabino-heptulosonate-7-phosphate synthase II (EC 2.5.1.54)]	Amino acids	297
function=[5-oxopent-3-ene-]	Amino acids	34
function=[ain protein CsdA]	Amino acids	27
function=[Alanine racemas]	Amino acids	65
function=[Arginine/ornithine ABC transporte]	Amino acids	119
function=[ATP phosphoribosyltransferase catalytic subunit (EC 2.4.2.17)]	Amino acids	204
function=[ATP phosphoribosyltransferase regulatory subunit (EC 2.4.2.17)]	Amino acids	126
function=[Beta-ureidopropionase (EC 3.5.1.6)]	Amino acids	259
function=[Creatinase (EC 3.5.3.3)]	Amino acids	184
function=[Cyanophycin synthase (EC 6.3.2.29)(EC 6.3.2.30)]	Amino acids	321
function=[Cyclohexadienyl dehydrogenase (EC 1.3.1.12)(EC 1.3.1.43)]	Amino acids	126
function=[Cys regulon transcriptional activator CysB]	Amino acids	92
function=[Cysteine synthase B (EC 2.5.1.47)]	Amino acids	248
function=[Dihydrodipicolinate reductase (EC 1.3.1.26)]	Amino acids	252
function=[Dimethylglycine dehydrogenase (EC 1.5.99.2)]	Amino acids	173
function=[Electron transfer flavoprotei]	Amino acids	827
function=[Electron transfer flavoprotein-ubiquinone oxidoreductase (EC 1.5.5.1)]	Amino acids	1902
function=[Enoyl-CoA hydratase (EC 4.2.1.17)]	Amino acids	3698
function=[Enoyl-CoA hydratase [valine degradation] (EC 4.2.1.17)]	Amino acids	248
function=[Ferredoxin-dependent glutamate synthase (EC 1.4.7.1)]	Amino acids	1024
function=[FIG003492: Threonine dehydrogenase and related Zn-dependent dehydrogenases]	Amino acids	66
function=[Formiminoglutamic iminohydrolase (EC 3.5.3.13)]	Amino acids	163
function=[Gamma-aminobutyrate:alpha-ketoglutarate aminotransferase (EC 2.6.1.19)]	Amino acids	201
function=[Gamma-glutamyl-aminobutyraldehyde dehydrogenase (EC 1.2.1.-)]	Amino acids	29
function=[Gamma-glutamyl-GABA hydrolase (EC 3.5.1.94)]	Amino acids	34
function=[Gamma-glutamyl-putrescine oxidase (EC1.4.3.-)]	Amino acids	33
function=[Gamma-glutamyl-putrescine synthetase (EC 6.3.1.11)]	Amino acids	61
function=[Glutamate 5-kinase (EC 2.7.2.11)]	Amino acids	317
function=[Glutamate Aspartate periplasmic binding protein precursor GltI (TC 3.A.1.3.4)]	Amino acids	53
function=[Glutamate Aspartate transport ATP-binding protein GltL (TC 3.A.1.3.4)]	Amino acids	87
function=[Glutamate Aspartate transport system permease protein GltJ (TC 3.A.1.3.4)]	Amino acids	70
function=[Glutamate Aspartate transport system permease protein GltK (TC 3.A.1.3.4)]	Amino acids	84
function=[glutamine synthetase family protein]	Amino acids	299
function=[Glycine cleavage system transcriptional activator GcvA]	Amino acids	97
function=[Histidine ABC transporte]	Amino acids	103
function=[Imidazolonepropionase (EC 3.5.2.7)]	Amino acids	229
function=[Indolepyruvate ferredoxin oxidoreductas]	Amino acids	794
function=[Indolepyruvate oxidoreductase subunit IorA (EC 1.2.7.8)]	Amino acids	60
function=[Iron binding protein IscA for iron-sulfur cluster assembly]	Amino acids	76
function=[Iron-sulfur cluster regulator IscR]	Amino acids	142
function=[Isovaleryl-CoA dehydrogenase (EC 1.3.99.10)]	Amino acids	447
function=[Kynurenine 3-monooxygenase (EC 1.14.13.9)]	Amino acids	75
function=[L-pipecolate dehydrogenase (EC 1.5.99.3)]	Amino acids	39
function=[Leucine-responsive regulatory protei]	Amino acids	40
function=[Methionine aminotransferas]	Amino acids	33
function=[N-acetylglutamate synthase (EC 2.3.1.1)]	Amino acids	143
function=[N-formylglutamate deformylase (EC 3.5.1.68)]	Amino acids	113
function=[N-succinyl-]	Amino acids	320
function=[ntR family domain]	Amino acids	69
function=[O-succinylhomoserine sulfhydrylase (EC 2.5.1.48)]	Amino acids	613
function=[Phosphate acetyltransferase (EC 2.3.1.8)]	Amino acids	169
function=[Phosphoribosylanthranilate isomerase (EC 5.3.1.24)]	Amino acids	132
function=[Phosphoserine aminotransferase (EC 2.6.1.52)]	Amino acids	509
function=[Putative fumarylacetoacetate (FAA) hydrolase]	Amino acids	38
function=[Putrescine ABC transporter putrescine-binding protein PotF (TC 3.A.1.11.2)]	Amino acids	78
function=[Putrescine transport system permease protein PotH (TC 3.A.1.11.2)]	Amino acids	131
function=[Putrescine transport system permease protein PotI (TC 3.A.1.11.2)]	Amino acids	159
function=[S-adenosylmethionine decarboxylase proenzyme (EC 4.1.1.50]	Amino acids	81
function=[scS subfamily]	Amino acids	96
function=[Shikimate kinase I (EC 2.7.1.71)]	Amino acids	200
function=[Spermidine Putrescine ABC transporter permease component PotB (TC 3.A.1.11.1)]	Amino acids	425
function=[Spermidine Putrescine ABC transporter permease component potC (TC_3.A.1.11.1)]	Amino acids	271
function=[Succinylglutamic semialdehyde dehydrogenase (EC 1.2.1.71)]	Amino acids	50
function=[Threonine dehydratase biosynthetic (EC 4.3.1.19)]	Amino acids	210
function=[Transcriptional activator MetR]	Amino acids	22
function=[Urea ABC transporte]	Amino acids	563
function=[Urea carboxylase (EC 6.3.4.6)]	Amino acids	30
function=[Urea carboxylase-related ABC transporte]	Amino acids	39
function=[Aspartate aminotransferase (EC 2.6.1.1)]	Amino acids	2401
function=[Phosphoribosyl-AMP cyclohydrolase (EC 3.5.4.19)]	Amino acids	397
function=[Homoserine dehydrogenase (EC 1.1.1.3)]	Amino acids	883
function=[Glutarate-semialdehyde dehydrogenase (EC 1.2.1.20)]	Amino acids	143
function=[Dihydroxy-acid dehydratase (EC 4.2.1.9)]	Amino acids	2943
function=[Imidazoleglycerol-phosphate dehydratase (EC 4.2.1.19)]	Amino acids	552
function=[Tryptophan synthase alpha chain (EC 4.2.1.20)]	Amino acids	508
function=[2-keto-3-deoxy-D-arabino-heptulosonate-7-phosphate synthase I alpha (EC 2.5.1.54)]	Amino acids	236
function=[Histidinol dehydrogenase (EC 1.1.1.23)]	Amino acids	900
function=[3-isopropylmalate dehydratase small subunit (EC 4.2.1.33)]	Amino acids	779
function=[Acetylornithine aminotransferase (EC 2.6.1.11)]	Amino acids	1169
function=[Cysteine synthase (EC 2.5.1.47)]	Amino acids	1525
function=[Methylthioribose-1-phosphate isomerase (EC 5.3.1.23)]	Amino acids	1583
function=[Adenosylhomocysteinase (EC 3.3.1.1)]	Amino acids	2315
function=[Ornithine carbamoyltransferase (EC 2.1.3.3)]	Amino acids	1254
function=[Indole-3-glycerol phosphate synthase (EC 4.1.1.48)]	Amino acids	480
function=[Dihydrolipoamide dehydrogenase (EC 1.8.1.4)]	Amino acids	488
function=[Acetoacetyl-CoA synthetase [leucine] (EC 6.2.1.16)]	Amino acids	434
function=[Homoserine kinase (EC 2.7.1.39)]	Amino acids	419
function=[S-adenosylmethionine synthetase (EC 2.5.1.6)]	Amino acids	1988
function=[Biotin carboxylase of methylcrotonyl-CoA carboxylase (EC 6.3.4.14)]	Amino acids	112
function=[3-isopropylmalate dehydrogenase (EC 1.1.1.85)]	Amino acids	1588
function=[Tryptophan synthase beta chain (EC 4.2.1.20)]	Amino acids	2417
function=[N-acetyl-gamma-glutamyl-phosphate reductase (EC 1.2.1.38)]	Amino acids	1090
function=[Histidinol-phosphate aminotransferase (EC 2.6.1.9)]	Amino acids	461
function=[Argininosuccinate lyase (EC 4.3.2.1)]	Amino acids	1198
function=[Methionine ABC transporter ATP-binding protein]	Amino acids	495
function=[Prephenate dehydratase (EC 4.2.1.51)]	Amino acids	470
function=[Branched-chain amino acid aminotransferase (EC 2.6.1.42)]	Amino acids	3648
function=[Threonine synthase (EC 4.2.3.1)]	Amino acids	2301
function=[Ketol-acid reductoisomerase (EC 1.1.1.86)]	Amino acids	1813
function=[Homocitrate synthase (EC 2.3.3.14)]	Amino acids	153
function=[Hydroxymethylglutaryl-CoA reductase (EC 1.1.1.34)]	Amino acids	807
function=[Lysine]	Amino acids	1493
function=[Aspartokinase (EC 2.7.2.4)]	Amino acids	1169
function=[Imidazole glycerol phosphate synthase amidotransferase subunit (EC 2.4.2.-)]	Amino acids	556
function=[2-amino-3-ketobutyrate coenzyme A ligase (EC 2.3.1.29)]	Amino acids	680
function=[Acetolactate synthase small subunit (EC 2.2.1.6)]	Amino acids	924
function=[Creatinine amidohydrolase (EC 3.5.2.10)]	Amino acids	154
function=[Acetylglutamate kinase (EC 2.7.2.8)]	Amino acids	645
function=[Cysteine desulfurase (EC 2.8.1.7)]	Amino acids	3274
function=[Anthranilate phosphoribosyltransferase (EC 2.4.2.18)]	Amino acids	636
function=[2-amino-]	Amino acids	479
function=[Aspartate ammonia-lyase (EC 4.3.1.1)]	Amino acids	563
function=[ATP phosphoribosyltransferase (EC 2.4.2.17)]	Amino acids	707
function=[Hydroxymethylglutaryl-CoA synthase (EC 2.3.3.10)]	Amino acids	492
function=[2-hydroxyhepta-]	Amino acids	261
function=[conserved protein associated with acetyl-CoA C-acyltransferase]	Amino acids	51
function=[Homoisocitrate dehydrogenase (EC 1.1.1.87)]	Amino acids	15
function=[Lysine biosynthesis protein LysX]	Amino acids	578
function=[N-acetyl-lysine deacetylase (EC 3.5.1.-)]	Amino acids	354
function=[Nickel transporter UreH]	Amino acids	31
function=[Phosphoserine phosphatase (EC 3.1.3.3)]	Amino acids	232
function=[Prephenate and/or arogenate dehydrogenase (unknown specificity) (EC 1.3.1.12)(EC 1.3.1.43)]	Amino acids	286
function=[Shikimate 5-dehydrogenase I alpha (EC 1.1.1.25)]	Amino acids	612
function=[Transcriptional regulator BkdR of isoleucine and valine catabolism operon]	Amino acids	225
function=[5-carboxymethyl-2-hydroxymuconate delta-isomerase (EC 5.3.3.10)]	Aromatics	96
function=[Beta-ketoadipyl CoA thiolase (EC 2.3.1.-)]	Aromatics	104
function=[3-dehydroquinate dehydratase I (EC 4.2.1.10)]	Aromatics	156
function=[Monoamine oxidase (1.4.3.4)]	Aromatics	168
function=[Lignostilbene-alph]	Aromatics	95
function=[Phenylacetic acid degradation protein PaaN]	Aromatics	32
function=[2-hydroxycyclohexanecarboxyl-CoA dehydrogenase (EC 1.1.1.-)]	Aromatics	63
function=[Phenylpropionate dioxygenase and related ring-hydroxylating dioxygenase]	Aromatics	201
function=[2-hydroxymuconic semialdehyde hydrolase (EC 3.7.1.9)]	Aromatics	62
function=[3-oxoadipate CoA-transferase subunit A (EC 2.8.3.6)]	Aromatics	137
function=[Large subunit naph/bph dioxygenase]	Aromatics	35
function=[putative 4-hydroxybenzoyl-CoA thioesterase]	Aromatics	50
function=[P-hydroxybenzoate hydroxylase (EC 1.14.13.2)]	Aromatics	86
function=[salicylate esterase]	Aromatics	47
function=[Benzoylformate decarboxylase (EC 4.1.1.7)]	Aromatics	75
function=[Acetaldehyde dehydrogenase (EC 1.2.1.10)]	Aromatics	79
function=[-dioate isomerase (EC 5.3.3.-)]	Aromatics	30
function=[Homogentisate]	Aromatics	335
function=[Catechol]	Aromatics	33
function=[Gentisate]	Aromatics	143
function=[Nitrilotriacetate monooxygenase component B (EC 1.14.13.-)]	Aromatics	48
function=[Succinyl-CoA:3-ketoacid-coenzyme A transferase subunit A (EC 2.8.3.5)]	Aromatics	272
function=[Quinate/shikimate dehydrogenase [Pyrroloquinoline-quinone] (EC 1.1.99.25)]	Aromatics	300
function=[3-dehydroquinate dehydratase II (EC 4.2.1.10)]	Aromatics	674
function=[Glutaryl-CoA dehydrogenase (EC 1.3.99.7)]	Aromatics	676
function=[3-hydroxyacyl-CoA dehydrogenase PaaC (EC 1.1.1.-)]	Aromatics	42
function=[Phenylacetate degradation enoyl-CoA hydratase PaaB (EC 4.2.1.17)]	Aromatics	19
function=[2-hydroxychromene-2-carboxylate isomerase]	Aromatics	232
function=[-dioic acid hydratase]	Aromatics	101
function=[Long-chain-fatty-acid--CoA ligase (EC 6.2.1.3)]	Aromatics	4448
function=[Aldehyde dehydrogenase (EC 1.2.1.3]	Aromatics	31
function=[Phenylacetate-coenzyme A ligase (EC 6.2.1.30) PaaF]	Aromatics	82
function=[ron-sulfur subunit YagT]	Aromatics	55
function=[5-carboxymethyl-2-hydroxymuconate semialdehyde dehydrogenase (EC 1.2.1.60)]	Aromatics	350
function=[mandelate racemase/muconate lactonizing enzyme family protein]	Aromatics	156
function=[Phenylacetaldehyde dehydrogenase (EC 1.2.1.39)]	Aromatics	13
function=[Isoquinoline 1-oxidoreductase alpha subunit (EC 1.3.99.16)]	Aromatics	345
function=[-dihydroxyhept-2-ene-]	Aromatics	60
function=[Phenylacetate-CoA oxygenase/reductas]	Aromatics	15
function=[Fumarylacetoacetate hydrolase family protein]	Aromatics	355
function=[Protocatechuate]	Aromatics	229
function=[biphenyl-]	Aromatics	57
function=[Benzoate]	Aromatics	109
function=[Probable vanillate O-demethylase oxygenase subunit oxidoreductase protein (EC 1.14.13.-)]	Aromatics	68
function=[Phenylacetic acid degradation protein PaaY]	Aromatics	17
function=[Muconate cycloisomerase (EC 5.5.1.1)]	Aromatics	114
function=[2-keto-4-pentenoate hydratase/2-oxohepta-3-ene-]	Aromatics	59
function=[2-polyprenylphenol hydroxylase and related flavodoxin oxidoreductases]	Aromatics	16
function=[3-oxoadipate CoA-transferase subunit B (EC 2.8.3.6)]	Aromatics	115
function=[4-carboxymuconolactone decarboxylase (EC 4.1.1.44)]	Aromatics	122
function=[4-hydroxycinnamoyl CoA hydratase/lyase (Enoyl-CoA hydratase/lyase) (EC 4.2.1.17)]	Aromatics	48
function=[4-oxalocrotonate decarboxylase (EC 4.1.1.77)]	Aromatics	60
function=[Acetyl-CoA acetyltransferase (EC 2.3.1.9)]	Aromatics	4016
function=[Acetyl-CoA C-acyltransferase (EC 2.3.1.16)]	Aromatics	169
function=[Aromatic-amino-acid aminotransferase (EC 2.6.1.57)]	Aromatics	27
function=[Benzoate transpor]	Aromatics	103
function=[Benzoate-CoA ligase (EC 6.2.1.25)]	Aromatics	205
function=[Benzoyl-CoA oxygenase component B]	Aromatics	239
function=[Benzoyl-CoA reductase subunit BadE (EC 1.3.99.15)]	Aromatics	42
function=[Benzoyl-CoA reductase subunit BadF (EC 1.3.99.15)]	Aromatics	9
function=[benzoyl-CoA-dihydrodiol lyase (BoxC)]	Aromatics	448
function=[Beta-ketoadipate enol-lactone hydrolase (EC 3.1.1.24)]	Aromatics	42
function=[Delta(3)-cis-delta(2)-trans-enoyl-CoA isomerase (EC 5.3.3.8)]	Aromatics	118
function=[Fumarylacetoacetase (EC 3.7.1.2)]	Aromatics	230
function=[lutathione-dependent]	Aromatics	10
function=[Maleate cis-trans isomerase (EC 5.2.1.1)]	Aromatics	27
function=[Maleylacetoacetate isomerase (EC 5.2.1.2)]	Aromatics	75
function=[Muconolactone isomerase (EC 5.3.3.4)]	Aromatics	84
function=[Ortho-halobenzoate]	Aromatics	72
function=[Phenylacetate degradation enoyl-CoA hydratase PaaA (EC 4.2.1.17)]	Aromatics	39
function=[Phenylacetate-CoA oxygenas]	Aromatics	147
function=[Phenylacetic acid degradation protein Paa]	Aromatics	204
function=[Positive regulator of phenol hydroxylase]	Aromatics	34
function=[Putative phthalate]	Aromatics	33
function=[Regulatory protein of benzoate catabolism]	Aromatics	25
function=[toluenesulfonate zinc-independent alcohol dehydrogenase]	Aromatics	66
function=[Vanillate O-demethylase oxidoreductase (EC 1.14.13.-)]	Aromatics	79
function=[Vanillate O-demethylase oxygenase subunit (EC 1.14.13.82)]	Aromatics	39
function=[Isoquinoline 1-oxidoreductase beta subunit (EC 1.3.99.16)]	Aromatics	491
function=[-diene-]	Aromatics	279
function=[4-hydroxyphenylacetate 3-monooxygenase (EC 1.14.13.3)]	Aromatics	671
function=[3-hydroxyacyl-CoA dehydrogenase (EC 1.1.1.35)]	Aromatics	3224
function=[Shikimate kinase II (EC 2.7.1.71)]	Aromatics	112
function=[Glycerol-3-phosphate dehydrogenase [NAD(P)+] (EC 1.1.1.94)]	Carbohydrates	336
function=[Xylulose kinase (EC 2.7.1.17)]	Carbohydrates	67
function=[2-methylaconitate racemase]	Carbohydrates	103
function=[Transketolas]	Carbohydrates	1576
function=[Xylulose-5-phosphate phosphoketolase (EC 4.1.2.9)]	Carbohydrates	212
function=[Dihydrolipoamide acetyltransferase component (E2) of acetoin dehydrogenase complex (EC 2.3.1.-)]	Carbohydrates	35
function=[Aldose 1-epimerase (EC 5.1.3.3)]	Carbohydrates	28
function=[Trehalose phosphorylase (EC 2.4.1.64)]	Carbohydrates	116
function=[Alph]	Carbohydrates	273
function=[Propionate--CoA ligase (EC 6.2.1.17)]	Carbohydrates	704
function=[Uronate isomerase (EC 5.3.1.12)]	Carbohydrates	47
function=[Alpha-L-fucosidase (EC 3.2.1.51)]	Carbohydrates	45
function=[Glycogen debranching enzyme (EC 3.2.1.-)]	Carbohydrates	206
function=[Rhamnulokinase (EC 2.7.1.5)]	Carbohydrates	19
function=[Alpha-N-arabinofuranosidase (EC 3.2.1.55)]	Carbohydrates	8
function=[Beta-hexosaminidase (EC 3.2.1.52)]	Carbohydrates	195
function=[Pyruvate kinase (EC 2.7.1.40)]	Carbohydrates	525
function=[COG2152 predicted glycoside hydrolase]	Carbohydrates	330
function=[Phosphoenolpyruvate-protein phosphotransferase of PTS system (EC 2.7.3.9)]	Carbohydrates	285
function=[2-dehydro-3-deoxyphosphogluconate aldolase (EC 4.1.2.14)]	Carbohydrates	45
function=[Predicted L-rhamnose ABC transporte]	Carbohydrates	48
function=[alT]	Carbohydrates	28
function=[L-malyl-CoA/beta-methylmalyl-CoA lyase (EC 4.1.3.-)]	Carbohydrates	66
function=[Myo-inositol 2-dehydrogenase 1 (EC 1.1.1.18)]	Carbohydrates	47
function=[Myo-inositol 2-dehydrogenase (EC 1.1.1.18)]	Carbohydrates	307
function=[Xylose ABC transporte]	Carbohydrates	69
function=[Dihydrolipoamide dehydrogenase of acetoin dehydrogenase (EC 1.8.1.4)]	Carbohydrates	19
function=[5-deoxy-glucuronate isomerase (EC 5.3.1.-)]	Carbohydrates	35
function=[Transketolase (EC 2.2.1.1)]	Carbohydrates	1273
function=[5-keto-D-gluconate 5-reductase (EC 1.1.1.69)]	Carbohydrates	33
function=[Predicted D-lactate dehydrogenas]	Carbohydrates	42
function=[Glucarate dehydratase (EC 4.2.1.40)]	Carbohydrates	11
function=[uncharacterized domain]	Carbohydrates	56
function=[Fructose-6-phosphate phosphoketolase (EC 4.1.2.22)]	Carbohydrates	278
function=[Glucose 1-dehydrogenase (EC 1.1.1.47)]	Carbohydrates	279
function=[5-FCL-like protein]	Carbohydrates	16
function=[Purine nucleoside phosphorylase (EC 2.4.2.1)]	Carbohydrates	152
function=[Deoxyribose-phosphate aldolase (EC 4.1.2.4)]	Carbohydrates	153
function=[Inosose isomerase (EC 5.3.99.-)]	Carbohydrates	99
function=[2-dehydro-3-deoxygluconate kinase (EC 2.7.1.45)]	Carbohydrates	66
function=[eta subunit (EC 1.2.4.4)]	Carbohydrates	103
function=[Xylose isomerase (EC 5.3.1.5)]	Carbohydrates	201
function=[Fumarate hydratase class II (EC 4.2.1.2)]	Carbohydrates	985
function=[Methylmalonate-semialdehyde dehydrogenase [inositol] (EC 1.2.1.27)]	Carbohydrates	174
function=[Glucose dehydrogenas]	Carbohydrates	596
function=[Probable electron transfer flavoprotein-quinone oxidoreductase FixC (EC 1.5.5.-)]	Carbohydrates	20
function=[(R)-2-hydroxyacid dehydrogenas]	Carbohydrates	23
function=[Enolase (EC 4.2.1.11)]	Carbohydrates	1456
function=[NADH dehydrogenase (EC 1.6.99.3)]	Carbohydrates	720
function=[Cob(I)alamin adenosyltransferase PduO (EC 2.5.1.17)]	Carbohydrates	498
function=[Glucosamine-6-phosphate deaminase (EC 3.5.99.6)]	Carbohydrates	73
function=[Glyoxylate reductase (EC 1.1.1.79)]	Carbohydrates	33
function=[UDP-glucose 4-epimerase (EC 5.1.3.2)]	Carbohydrates	3866
function=[-bisphosphatas]	Carbohydrates	119
function=[Glucose-6-phosphate isomerase (EC 5.3.1.9)]	Carbohydrates	545
function=[High-affnity carbon uptake protein Hat/HatR]	Carbohydrates	127
function=[L-rhamnose isomerase (EC 5.3.1.14)]	Carbohydrates	28
function=[L-fuconate dehydratase (EC 4.2.1.68)]	Carbohydrates	52
function=[Xylan oligosaccharide ABC transporte]	Carbohydrates	19
function=[D-malic enzyme (EC 1.1.1.83)]	Carbohydrates	185
function=[Ribose 5-phosphate isomerase B (EC 5.3.1.6)]	Carbohydrates	91
function=[Transaldolase (EC 2.2.1.2)]	Carbohydrates	1157
function=[Alfa-L-rhamnosidase (EC 3.2.1.40)]	Carbohydrates	37
function=[4-alpha-glucanotransferase (amylomaltase) (EC 2.4.1.25)]	Carbohydrates	88
function=[Putative glycogen debranching enzym]	Carbohydrates	57
function=[Acetate permease ActP (cation/acetate symporter)]	Carbohydrates	1632
function=[Glycolate oxidase (EC 1.1.3.15)]	Carbohydrates	34
function=[Phosphoenolpyruvate synthase (EC 2.7.9.2)]	Carbohydrates	351
function=[Maltose O-acetyltransferase (EC 2.3.1.79)]	Carbohydrates	27
function=[Sorbitol-6-phosphate 2-dehydrogenase (EC 1.1.1.140)]	Carbohydrates	32
function=[Endo-]	Carbohydrates	12
function=[Acetyl-CoA synthetase (ADP-forming) alpha and beta chain]	Carbohydrates	1456
function=[Fructose-]	Carbohydrates	923
function=[Methylmalonyl-CoA decarboxylas]	Carbohydrates	123
function=[Maltose phosphorylase (EC 2.4.1.8)]	Carbohydrates	19
function=[Malate Na(+) symporter]	Carbohydrates	57
function=[Glycerophosphoryl diester phosphodiesterase (EC 3.1.4.46)]	Carbohydrates	168
function=[Glycine dehydrogenase [decarboxylating] (glycine cleavage system P2 protein) (EC 1.4.4.2)]	Carbohydrates	1930
function=[Pyrimidine-nucleoside phosphorylase (EC 2.4.2.2)]	Carbohydrates	49
function=[Glycogen branching enzym]	Carbohydrates	23
function=[Hypothetical transmembrane protein coupled to NADH-ubiquinone oxidoreductase chain 5 homolog]	Carbohydrates	48
function=[Acetoacetate metabolism regulatory protein AtoC]	Carbohydrates	189
function=[Methenyltetrahydrofolate cyclohydrolase (EC 3.5.4.9)]	Carbohydrates	163
function=[Myo-inositol ABC transporte]	Carbohydrates	9
function=[6-phosphofructokinase (EC 2.7.1.11)]	Carbohydrates	570
function=[Acetate kinase (EC 2.7.2.1)]	Carbohydrates	240
function=[Pyruvate carboxyl transferase subunit B (EC 6.4.1.1)]	Carbohydrates	79
function=[3-hydroxyacyl-CoA dehydrogenase [isoleucine degradation] (EC 1.1.1.35)]	Carbohydrates	40
function=[Glycerol kinase (EC 2.7.1.30)]	Carbohydrates	1047
function=[Glycerophosphoryl diester phosphodiesteras]	Carbohydrates	12
function=[Glyoxylate reductase (EC 1.1.1.26)]	Carbohydrates	88
function=[Hydroxyacylglutathione hydrolase (EC 3.1.2.6)]	Carbohydrates	489
function=[Pyruvat]	Carbohydrates	2440
function=[Ribulose-phosphate 3-epimerase (EC 5.1.3.1)]	Carbohydrates	433
function=[Hydroxypyruvate reductase (EC 1.1.1.81)]	Carbohydrates	505
function=[B12 binding domain of Methylmalonyl-CoA mutase (EC 5.4.99.2)]	Carbohydrates	283
function=[Ribose 5-phosphate isomerase A (EC 5.3.1.6)]	Carbohydrates	305
function=[Glycerol uptake facilitator protein]	Carbohydrates	102
function=[Acetaldehyde dehydrogenas]	Carbohydrates	140
function=[Isocitrate dehydrogenase [NAD] (EC 1.1.1.41)]	Carbohydrates	483
function=[Phosphoenolpyruvate carboxykinase [GTP] (EC 4.1.1.32)]	Carbohydrates	461
function=[Beta-xylosidase (EC 3.2.1.37)]	Carbohydrates	17
function=[Pyruvate:ferredoxin oxidoreductas]	Carbohydrates	180
function=[6-phosphogluconate dehydrogenas]	Carbohydrates	511
function=[Polyphosphate glucokinase (EC 2.7.1.63)]	Carbohydrates	21
function=[Altronate hydrolase (EC 4.2.1.7)]	Carbohydrates	244
function=[Predicted D-mannonate epimerase]	Carbohydrates	28
function=[L-alanine:glyoxylate aminotransferase (EC 2.6.1.44)]	Carbohydrates	248
function=[Succinyl-CoA ligase [ADP-forming] alpha chain (EC 6.2.1.5)]	Carbohydrates	1295
function=[DP-glucose transglucosylase (EC 2.4.1.21)]	Carbohydrates	77
function=[Tartrate decarboxylase (EC 4.1.1.73)]	Carbohydrates	116
function=[Glycogen synthas]	Carbohydrates	72
function=[Ribose operon repressor]	Carbohydrates	13
function=[Aldehyde dehydrogenase A (EC 1.2.1.22)]	Carbohydrates	44
function=[Catalase (EC 1.11.1.6)]	Carbohydrates	2791
function=[Isocitrate dehydrogenase [NADP] (EC 1.1.1.42)]	Carbohydrates	1397
function=[Chitinase (EC 3.2.1.14)]	Carbohydrates	86
function=[Alpha-mannosidase (EC 3.2.1.24)]	Carbohydrates	27
function=[Inositol transport system permease protein]	Carbohydrates	29
function=[Branched-chain acyl-CoA dehydrogenase (EC 1.3.99.12)]	Carbohydrates	206
function=[Thymidine phosphorylase (EC 2.4.2.4)]	Carbohydrates	94
function=[Pyrophosphate--fructose 6-phosphate 1-phosphotransferas]	Carbohydrates	42
function=[N-acetylglucosamine-6-phosphate deacetylase (EC 3.5.1.25)]	Carbohydrates	46
function=[Glycogen phosphorylase (EC 2.4.1.1)]	Carbohydrates	235
function=[Glucoamylase (EC 3.2.1.3)]	Carbohydrates	217
function=[Methylcrotonyl-CoA carboxylase carboxyl transferase subunit (EC 6.4.1.4)]	Carbohydrates	1486
function=[2-deoxy-D-gluconate 3-dehydrogenase (EC 1.1.1.125)]	Carbohydrates	86
function=[D-xylose transport ATP-binding protein XylG]	Carbohydrates	57
function=[Ethylmalonyl-CoA mutas]	Carbohydrates	209
function=[L-arabonate dehydratase (EC 4.2.1.25)]	Carbohydrates	173
function=[NAD-independent protein deacetylase AcuC]	Carbohydrates	36
function=[NADPH-dependent glyceraldehyde-3-phosphate dehydrogenase (EC 1.2.1.13)]	Carbohydrates	221
function=[TcuA: flavoprotein used to oxidize tricarballylate to cis-aconitate]	Carbohydrates	75
function=[Ethanolamine ammonia-lyase heavy chain (EC 4.3.1.7)]	Carbohydrates	12
function=[Alpha-glucosidase (EC 3.2.1.20)]	Carbohydrates	44
function=[L-fuconolactone hydrolase]	Carbohydrates	21
function=[Galactonate dehydratase (EC 4.2.1.6)]	Carbohydrates	104
function=[Dihydrolipoamide acyltransferase component of branched-chain alpha-keto acid dehydrogenase complex (EC 2.3.1.168)]	Carbohydrates	554
function=[5-keto-2-deoxygluconokinase (EC 2.7.1.92)]	Carbohydrates	48
function=[erobic (EC 4.2.1.2)]	Carbohydrates	153
function=[Fumarate hydratase class I (EC 4.2.1.2)]	Carbohydrates	19
function=[ethylmalonyl-CoA mutase]	Carbohydrates	2525
function=[decarboxylase]	Carbohydrates	5810
function=[Glucose-6-phosphate 1-dehydrogenase (EC 1.1.1.49)]	Carbohydrates	639
function=[Predicted lactaldehyde dehydrogenase (EC 1.2.1.22)]	Carbohydrates	41
function=[Putative deoxyribose-specific ABC transporte]	Carbohydrates	45
function=[L-lactate permease]	Carbohydrates	97
function=[Acetone carboxylas]	Carbohydrates	103
function=[Citrate synthase (si) (EC 2.3.3.1)]	Carbohydrates	2006
function=[Fructokinase (EC 2.7.1.4)]	Carbohydrates	92
function=[Putative sucrose phosphorylase (EC 2.4.1.7)]	Carbohydrates	18
function=[Glucose-1-phosphate adenylyltransferase (EC 2.7.7.27)]	Carbohydrates	325
function=[Formyltetrahydrofolate deformylase (EC 3.5.1.10)]	Carbohydrates	409
function=[Acetoin dehydrogenase E1 component alpha-subunit (EC 1.2.4.-)]	Carbohydrates	293
function=[Formylmethanofuran dehydrogenase subunit A (EC 1.2.99.5)]	Carbohydrates	62
function=[Pyruvate dehydrogenase E1 component alpha subunit (EC 1.2.4.1)]	Carbohydrates	352
function=[Ribose-phosphate pyrophosphokinase (EC 2.7.6.1)]	Carbohydrates	1109
function=[Inositol transport system ATP-binding protein]	Carbohydrates	46
function=[Triosephosphate isomerase (EC 5.3.1.1)]	Carbohydrates	415
function=[6-phosphogluconolactonase (EC 3.1.1.31)]	Carbohydrates	43
function=[Multiple sugar ABC transporte]	Carbohydrates	158
function=[Acetyl-CoA:acetoacetyl-CoA transferas]	Carbohydrates	54
function=[Glycine dehydrogenase [decarboxylating] (glycine cleavage system P1 protein) (EC 1.4.4.2)]	Carbohydrates	999
function=[Malto-oligosyltrehalose synthase (EC 5.4.99.15)]	Carbohydrates	80
function=[Acetoin dehydrogenase E1 component beta-subunit (EC 1.2.4.-)]	Carbohydrates	348
function=[Pyruvate dehydrogenase E1 component beta subunit (EC 1.2.4.1)]	Carbohydrates	429
function=[Enoyl-CoA hydratase [branched-chain amino acid degradation] (EC 4.2.1.17)]	Carbohydrates	95
function=[Phosphoglycerate kinase (EC 2.7.2.3)]	Carbohydrates	990
function=[Phosphoglycerate mutase (EC 5.4.2.1)]	Carbohydrates	434
function=[Rubisco activation protein CbbQ]	Carbohydrates	54
function=[Prolipoprotein diacylglyceryl transferase (EC 2.4.99.-)]	Carbohydrates	906
function=[Malate synthase (EC 2.3.3.9)]	Carbohydrates	249
function=[2-methylcitrate dehydratase (EC 4.2.1.79)]	Carbohydrates	293
function=[Gluconate dehydratase (EC 4.2.1.39)]	Carbohydrates	255
function=[2-oxoglutarate dehydrogenase E1 component (EC 1.2.4.2)]	Carbohydrates	1090
function=[Galactokinase (EC 2.7.1.6)]	Carbohydrates	31
function=[Malyl-CoA lyase (EC 4.1.3.24)]	Carbohydrates	229
function=[Alanine dehydrogenase (EC 1.4.1.1)]	Carbohydrates	707
function=[Predicted L-lactate dehydrogenas]	Carbohydrates	506
function=[Beta-phosphoglucomutase (EC 5.4.2.6)]	Carbohydrates	34
function=[Hydroxypyruvate isomerase (EC 5.3.1.22)]	Carbohydrates	136
function=[ype I (EC 3.1.3.11)]	Carbohydrates	24
function=[Fructose-bisphosphate aldolase class II (EC 4.1.2.13)]	Carbohydrates	163
function=[1 componen]	Carbohydrates	560
function=[Nucleoside permease NupC]	Carbohydrates	177
function=[2-dehydro-3-deoxyphosphogalactonate aldolase (EC 4.1.2.21)]	Carbohydrates	29
function=[Peptide methionine sulfoxide reductase MsrB (EC 1.8.4.12)]	Carbohydrates	1424
function=[Malto-oligosyltrehalose trehalohydrolase (EC 3.2.1.141)]	Carbohydrates	86
function=[Alcohol dehydrogenas]	Carbohydrates	84
function=[Glycolate dehydrogenase (EC 1.1.99.14]	Carbohydrates	816
function=[Sugar/maltose fermentation stimulation protein homolog]	Carbohydrates	123
function=[Propionate catabolism operon regulatory protein PrpR]	Carbohydrates	24
function=[Formate efflux transporter (TC 2.A.44 family)]	Carbohydrates	48
function=[Formaldehyde activating enzyme]	Carbohydrates	55
function=[Formylmethanofuran--tetrahydromethanopterin N-formyltransferase (EC 2.3.1.101)]	Carbohydrates	14
function=[Aldehyde dehydrogenase B (EC 1.2.1.22)]	Carbohydrates	475
function=[Isocitrate lyase (EC 4.1.3.1)]	Carbohydrates	617
function=[3-hydroxyisobutyrate dehydrogenase (EC 1.1.1.31)]	Carbohydrates	396
function=[Pyruvate oxidase [ubiquinon]	Carbohydrates	275
function=[CoA-acylating propionaldehyde dehydrogenase]	Carbohydrates	18
function=[Non-phosphorylating glyceraldehyde-3-phosphate dehydrogenase (NADP) (EC 1.2.1.9)]	Carbohydrates	195
function=[2-methylisocitrate dehydratase (EC 4.2.1.99)]	Carbohydrates	241
function=[5-carboxymethyl-2-oxo-hex-3- ene-]	Carbohydrates	49
function=[N-Acetyl-D-glucosamine ABC transport system ATP-binding protein]	Carbohydrates	13
function=[Propionyl-CoA carboxylase carboxyl transferase subunit (EC 6.4.1.3)]	Carbohydrates	412
function=[Beta-glucosidase (EC 3.2.1.21)]	Carbohydrates	124
function=[Alpha-amylase (EC 3.2.1.1)]	Carbohydrates	87
function=[Dihydrolipoamide dehydrogenase of 2-oxoglutarate dehydrogenase (EC 1.8.1.4)]	Carbohydrates	298
function=[putative esterase]	Carbohydrates	108
function=[Maltodextrin glucosidase (EC 3.2.1.20)]	Carbohydrates	23
function=[Mesaconyl-CoA hydratase]	Carbohydrates	123
function=[Trehalose synthase (EC 5.4.99.16)]	Carbohydrates	114
function=[2-oxoglutarate/malate translocator]	Carbohydrates	25
function=[Fumarate hydratase class]	Carbohydrates	370
function=[Phosphoenolpyruvate-dihydroxyacetone phosphotransferase (EC 2.7.1.121]	Carbohydrates	31
function=[Phosphoglycolate phosphatase (EC 3.1.3.18)]	Carbohydrates	45
function=[D-alanine aminotransferase (EC 2.6.1.21)]	Carbohydrates	89
function=[Dihydrolipoamide dehydrogenase of pyruvate dehydrogenase complex (EC 1.8.1.4)]	Carbohydrates	481
function=[Epi-inositol hydrolase (EC 3.7.1.-)]	Carbohydrates	133
function=[Glycine dehydrogenase [decarboxylating] (glycine cleavage system P protein) (EC 1.4.4.2)]	Carbohydrates	2526
function=[Methylisocitrate lyase (EC 4.1.3.30)]	Carbohydrates	280
function=[-alpha-glucan (glycogen) branching enzym]	Carbohydrates	141
function=[Phosphopentomutase (EC 5.4.2.7)]	Carbohydrates	139
function=[3-hydroxybutyryl-CoA epimerase (EC 5.1.2.3)]	Carbohydrates	248
function=[Ribose ABC transport syste]	Carbohydrates	319
function=[2-ketoglutaric semialdehyde dehydrogenase (EC 1.2.1.26)]	Carbohydrates	41
function=[2-methylcitrate synthase (EC 2.3.3.5)]	Carbohydrates	209
function=[Acetoacetyl-CoA reductase (EC 1.1.1.36)]	Carbohydrates	165
function=[Aconitate hydratase 2 (EC 4.2.1.3)]	Carbohydrates	86
function=[Aldehyde dehydrogenase (EC 1.2.1.3)]	Carbohydrates	1846
function=[Crotonyl-CoA carboxylase/reductas]	Carbohydrates	159
function=[crotonyl-CoA reductase]	Carbohydrates	37
function=[D-Lactate dehydrogenas]	Carbohydrates	177
function=[Dihydrolipoamide acetyltransferase component of pyruvate dehydrogenase complex (EC 2.3.1.12)]	Carbohydrates	523
function=[Dihydrolipoamide succinyltransferase component (E2) of 2-oxoglutarate dehydrogenase complex (EC 2.3.1.61)]	Carbohydrates	485
function=[Formate--tetrahydrofolate ligase (EC 6.3.4.3)]	Carbohydrates	620
function=[Glucokinas]	Carbohydrates	61
function=[Glycerol-3-phosphate ABC transporte]	Carbohydrates	1122
function=[Glycerol-3-phosphate regulon represso]	Carbohydrates	34
function=[Glycine cleavage system H protein]	Carbohydrates	850
function=[hypothetical protein that often co-occurs with aconitase]	Carbohydrates	36
function=[Hypothetical protein VC0266 (sugar utilization related?)]	Carbohydrates	145
function=[iosynthetic (EC 5.1.1.1)]	Carbohydrates	49
function=[Iron-containing alcohol dehydrogenase]	Carbohydrates	22
function=[isobutyryl-CoA dehydrogenase]	Carbohydrates	69
function=[Isocitrate dehydrogenase phosphatase (EC 2.7.11.5)/kinase (EC 3.1.3.-)]	Carbohydrates	101
function=[L-fuco-beta-pyranose dehydrogenase]	Carbohydrates	27
function=[L-fuculose phosphate aldolase (EC 4.1.2.17)]	Carbohydrates	19
function=[Lactoylglutathione lyase (EC 4.4.1.5)]	Carbohydrates	644
function=[Leucine]	Carbohydrates	122
function=[lpha subunit (EC 1.2.4.4)]	Carbohydrates	99
function=[lpha subunit]	Carbohydrates	320
function=[Malate synthase G (EC 2.3.3.9)]	Carbohydrates	555
function=[Malonate transporte]	Carbohydrates	23
function=[Maltose/maltodextrin ABC transporte]	Carbohydrates	206
function=[Maltose/maltodextrin transport ATP-binding protein MalK (EC 3.6.3.19)]	Carbohydrates	194
function=[Mannose-1-phosphate guanylyltransferase (EC 2.7.7.13 )]	Carbohydrates	24
function=[Mannose-1-phosphate guanylyltransferase (GDP) (EC 2.7.7.22)]	Carbohydrates	286
function=[Methylene tetrahydromethanopterin dehydrogenase (EC 1.5.99.9)]	Carbohydrates	35
function=[Methylsuccinyl-CoA dehydrogenas]	Carbohydrates	136
function=[n cluster with Hydroxyacylglutathione hydrolase (EC 3.1.2.6)]	Carbohydrates	27
function=[NAD-dependent malic enzyme (EC 1.1.1.38)]	Carbohydrates	245
function=[NADP-dependent malic enzyme (EC 1.1.1.40)]	Carbohydrates	946
function=[Omega-amino acid--pyruvate aminotransferase (EC 2.6.1.18)]	Carbohydrates	654
function=[Oxaloacetate decarboxylase alpha chain (EC 4.1.1.3)]	Carbohydrates	127
function=[Phosphoenolpyruvate carboxylase (EC 4.1.1.31)]	Carbohydrates	235
function=[Phosphoribulokinase (EC 2.7.1.19)]	Carbohydrates	135
function=[Polysaccharide deacetylase]	Carbohydrates	255
function=[Possible fucose ABC transporte]	Carbohydrates	17
function=[Predicted nucleoside ABC transporte]	Carbohydrates	143
function=[probable RuBisCo-expression protein CbbX]	Carbohydrates	22
function=[PrpF protein involved in 2-methylcitrate cycle]	Carbohydrates	41
function=[Pyruvate carboxyl transferase (EC 6.4.1.1)]	Carbohydrates	618
function=[Ribulose bisphosphate carboxylase large chain (EC 4.1.1.39)]	Carbohydrates	41
function=[rokaryotic class 1B]	Carbohydrates	29
function=[Serine-pyruvate aminotransferase/archaeal aspartate aminotransferase]	Carbohydrates	63
function=[Trehalose-6-phosphate phosphatase (EC 3.1.3.12)]	Carbohydrates	101
function=[Trimethylamine:corrinoid methyltransferase]	Carbohydrates	27
function=[Valine--pyruvate aminotransferase (EC 2.6.1.66)]	Carbohydrates	160
function=[Xylonate dehydratase (EC 4.2.1.82)]	Carbohydrates	60
function=[Malate dehydrogenase (EC 1.1.1.37)]	Carbohydrates	1551
function=[Succinate dehydrogenase iron-sulfur protein (EC 1.3.99.1)]	Carbohydrates	1726
function=[Acetyl-CoA synthetase (ADP-forming) beta chain (EC 6.2.1.13)]	Carbohydrates	142
function=[Carbohydrate Esterase Family 4]	Carbohydrates	10
function=[Propionyl-CoA carboxylase biotin-containing subunit (EC 6.4.1.3)]	Carbohydrates	237
function=[D-lactate dehydrogenase (EC 1.1.1.28)]	Carbohydrates	64
function=[Pyruvate carboxyl transferase subunit A (EC 6.4.1.1)]	Carbohydrates	238
function=[Propionyl-CoA carboxylase beta chain (EC 6.4.1.3)]	Carbohydrates	1132
function=[Ribose]	Carbohydrates	222
function=[Methylenetetrahydrofolate dehydrogenase (NADP+) (EC 1.5.1.5)]	Carbohydrates	769
function=[3-hydroxybutyryl-CoA dehydrogenase (EC 1.1.1.157)]	Carbohydrates	2110
function=[Phosphoenolpyruvate carboxykinase [ATP] (EC 4.1.1.49)]	Carbohydrates	1795
function=[Succinyl-CoA ligase [ADP-forming] beta chain (EC 6.2.1.5)]	Carbohydrates	1378
function=[Aconitate hydratase (EC 4.2.1.3)]	Carbohydrates	2532
function=[Methylmalonyl-CoA epimerase (EC 5.1.99.1)]	Carbohydrates	204
function=[Acylphosphate phosphohydrolase (EC 3.6.1.7]	Carbohydrates	79
function=[D-glycerate 2-kinase (EC 2.7.1.-)]	Carbohydrates	218
function=[Glucose-6-phosphate isomeras]	Carbohydrates	84
function=[Serine--glyoxylate aminotransferase (EC 2.6.1.45)]	Carbohydrates	1010
function=[3-hydroxybutyryl-CoA dehydratase (EC 4.2.1.55)]	Carbohydrates	488
function=[5-formyltetrahydrofolate cyclo-ligase (EC 6.3.3.2)]	Carbohydrates	73
function=[Acetyl-CoA synthetase (ADP-forming) alpha chain (EC 6.2.1.13)]	Carbohydrates	656
function=[Aconitate hydratase]	Carbohydrates	71
function=[Alcohol dehydrogenase (EC 1.1.1.1)]	Carbohydrates	2261
function=[F420-dependent N(5]	Carbohydrates	431
function=[Galactose-1-phosphate uridylyltransferase (EC 2.7.7.10)]	Carbohydrates	297
function=[N5-methyltetrahydromethanopterin:coenzyme M methyltransferase subunit A (EC 2.1.1.86)]	Carbohydrates	36
function=[NAD(P)-dependent glyceraldehyde 3-phosphate dehydrogenase archaeal (EC 1.2.1.59)]	Carbohydrates	273
function=[Phosphomannomutase (EC 5.4.2.8)]	Carbohydrates	1379
function=[rchaeal type (EC 3.1.3.18)]	Carbohydrates	136
function=[Ribokinase (EC 2.7.1.15)]	Carbohydrates	546
function=[Gluconolactonase (EC 3.1.1.17)]	Carbohydrates	269
function=[Mannonate dehydratase (EC 4.2.1.8)]	Carbohydrates	66
function=[HPr kinase/phosphorylase (EC 2.7.1.-) (EC 2.7.4.-)]	Carbohydrates	60
function=[Fructose-bisphosphate aldolase class I (EC 4.1.2.13)]	Carbohydrates	633
function=[Mannose-6-phosphate isomerase (EC 5.3.1.8)]	Carbohydrates	135
function=[Glycerol-3-phosphate transporter]	Carbohydrates	44
function=[Trehalose 6-phosphate phosphorylase (EC 2.4.1.216)]	Carbohydrates	19
function=[Allantoinase (EC 3.5.2.5)]	Nitrogen	126
function=[Glutamate synthase [NADPH] small chain (EC 1.4.1.13)]	Nitrogen	1668
function=[2-hydroxy-3-oxopropionate reductase (EC 1.1.1.60)]	Nitrogen	962
function=[Glycerate kinase (EC 2.7.1.31)]	Nitrogen	114
function=[Nitrite reductase [NAD(P)H] large subunit (EC 1.7.1.4)]	Nitrogen	135
function=[ukaryotic (EC 6.3.1.2)]	Nitrogen	82
function=[Periplasmic nitrate reductase precursor (EC 1.7.99.4)]	Nitrogen	1072
function=[Nitrite reductase accessory protein NirV]	Nitrogen	78
function=[ammonium/methylammonium permease]	Nitrogen	35
function=[Nitrate ABC transporte]	Nitrogen	25
function=[Nitrogen regulatory protein P-II]	Nitrogen	507
function=[Respiratory nitrate reductase beta chain (EC 1.7.99.4)]	Nitrogen	279
function=[Glutamine synthetase type II]	Nitrogen	331
function=[Uroporphyrinogen-III methyltransferase (EC 2.1.1.107)]	Nitrogen	740
function=[Assimilatory nitrate reductase large subunit (EC:1.7.99.4)]	Nitrogen	412
function=[Nitrous oxide reductase maturation protein NosF (ATPase)]	Nitrogen	29
function=[putative cytochrome P450 hydroxylase]	Nitrogen	678
function=[Functional role page for Anaerobic nitric oxide reductase transcription regulator NorR]	Nitrogen	92
function=[Flavohemoprotein]	Nitrogen	96
function=[Glutamate synthase [NADPH] putative GlxC chain (EC 1.4.1.13)]	Nitrogen	352
function=[Nitrite reductase probable [NAD(P)H] subunit (EC 1.7.1.4)]	Nitrogen	52
function=[Carbonic anhydrase (EC 4.2.1.1)]	Nitrogen	498
function=[Respiratory nitrate reductase alpha chain (EC 1.7.99.4)]	Nitrogen	250
function=[Nitrogen regulation protein NR(I)]	Nitrogen	351
function=[Nitrous-oxide reductase (EC 1.7.99.6)]	Nitrogen	63
function=[Nitrogenase (molybdenum-iron)-specific transcriptional regulator NifA]	Nitrogen	263
function=[Nitrite reductase [NAD(P)H] small subunit (EC 1.7.1.4)]	Nitrogen	13
function=[[Protein-PII] uridylyltransferase (EC 2.7.7.59)]	Nitrogen	663
function=[Allantoicase (EC 3.5.3.4)]	Nitrogen	97
function=[Amidase clustered with urea ABC transporter and nitrile hydratase functions]	Nitrogen	145
function=[Cytochrome c-type protein NapC]	Nitrogen	284
function=[Ferredoxin-type protein NapG (periplasmic nitrate reductase)]	Nitrogen	41
function=[Glutamate-ammonia-ligase adenylyltransferase (EC 2.7.7.42)]	Nitrogen	348
function=[Nitrate reductase cytochrome c550-type subunit]	Nitrogen	44
function=[Nitrate/nitrite transporter]	Nitrogen	325
function=[Nitric-oxide reductase (EC 1.7.99.7]	Nitrogen	26
function=[Nitrogen regulation protein NR(II) (EC 2.7.3.-)]	Nitrogen	37
function=[Polyferredoxin NapH (periplasmic nitrate reductase)]	Nitrogen	67
function=[Ureidoglycolate dehydrogenase (EC 1.1.1.154)]	Nitrogen	34
function=[Cytochrome c552 precursor (EC 1.7.2.2)]	Nitrogen	215
function=[Cytochrome c nitrite reductas]	Nitrogen	19
function=[Manganese superoxide dismutase (EC 1.15.1.1)]	Nitrogen	1733
function=[Ammonium transporter]	Nitrogen	2533
function=[Copper-containing nitrite reductase (EC 1.7.2.1)]	Nitrogen	675
function=[Nitric oxide reductase activation protein NorQ]	Nitrogen	164
function=[Ammonium transporter family]	Nitrogen	42
function=[Cytochrome c-type biogenesis protein CcdA (DsbD analog)]	Protein	201
function=[Cysteinyl-tRNA synthetase (EC 6.1.1.16)]	Protein	1524
function=[ossibly involved in tRNA or rRNA modification]	Protein	198
function=[ATP-dependent protease La (EC 3.4.21.53)]	Protein	1154
function=[Chaperone protein HscA]	Protein	90
function=[Lipid carrier : UDP-N-acetylgalactosaminyltransferase (EC 2.4.1.-)]	Protein	83
function=[GTP-binding and nucleic acid-binding protein YchF]	Protein	1339
function=[Hsp]	Protein	25
function=[Bacterial proteasome-activating AAA-ATPase (PAN)]	Protein	95
function=[ossible component of postulated heterodimer PafA-PafA'']	Protein	91
function=[Pup ligase Paf]	Protein	64
function=[Pup ligase PafA'' paralo]	Protein	64
function=[proteasome-activating AAA-ATPase (PAN)]	Protein	129
function=[acterial]	Protein	56
function=[Translation initiation factor 3]	Protein	319
function=[Prokaryotic ubiquitin-like protein Pup]	Protein	20
function=[Selenocysteine-specific translation elongation factor]	Protein	167
function=[ctinobacterial subgroup]	Protein	197
function=[SSU rRNA]	Protein	126
function=[Proteasome subunit alpha (EC 3.4.25.1]	Protein	336
function=[LSU ribosomal protein L27p]	Protein	159
function=[Acylamino-acid-releasing enzyme (EC 3.4.19.1)]	Protein	344
function=[Isoaspartyl aminopeptidase (EC 3.4.19.5)]	Protein	45
function=[Alpha-]	Protein	97
function=[TldE/PmbA family protei]	Protein	30
function=[SSU ribosomal protein S13p (S18e)]	Protein	190
function=[Glutaminyl-tRNA synthetase (EC 6.1.1.18)]	Protein	1815
function=[LSU ribosomal protein L2p (L8e)]	Protein	753
function=[Methionyl-tRNA formyltransferase (EC 2.1.2.9)]	Protein	180
function=[SSU ribosomal protein S18p]	Protein	131
function=[SSU ribosomal protein S8p (S15Ae)]	Protein	197
function=[ypically selenocysteine-containing]	Protein	796
function=[LSU ribosomal protein L19p]	Protein	328
function=[LSU ribosomal protein L23p (L23Ae)]	Protein	122
function=[ClpB protein]	Protein	2420
function=[tRNA (Guanine37-N1) -methyltransferase (EC 2.1.1.31)]	Protein	661
function=[LSU ribosomal protein L16p (L10e)]	Protein	370
function=[SSU ribosomal protein S7p (S5e)]	Protein	341
function=[Glycyl-tRNA synthetase alpha chain (EC 6.1.1.14)]	Protein	615
function=[Phospholipid-lipopolysaccharide ABC transporter]	Protein	61
function=[Translation elongation factor Ts]	Protein	347
function=[Oligopeptidase A (EC 3.4.24.70)]	Protein	209
function=[Hypothetical protein YaeJ with similarity to translation release factor]	Protein	47
function=[Peptidyl-prolyl cis-trans isomerase ppiB (EC 5.2.1.8)]	Protein	145
function=[DnaJ-class molecular chaperone CbpA]	Protein	212
function=[Methionyl-tRNA synthetase (EC 6.1.1.10)]	Protein	1886
function=[NADH dehydrogenase subunit 5]	Protein	23
function=[Aminoacyl-histidine dipeptidase (Peptidase D) (EC 3.4.13.3)]	Protein	17
function=[RNA helicas]	Protein	39
function=[intein-containing]	Protein	1303
function=[Eukaryotic translation initiation factor 2 gamma subunit]	Protein	909
function=[SSU ribosomal protein S27Ae]	Protein	34
function=[Translation initiation factor SUI1-related protein]	Protein	210
function=[-dehydratase (EC 4.2.1.-)]	Protein	403
function=[Leucyl-tRNA synthetase (EC 6.1.1.4)]	Protein	3332
function=[Heat shock protein 60 family chaperone GroEL]	Protein	3951
function=[Proteasome-activating AAA-ATPase (PAN]	Protein	190
function=[SSU ribosomal protein S11e (S17p)]	Protein	116
function=[LSU ribosomal protein L9e (L6p)]	Protein	147
function=[SSU ribosomal protein S15Ae (S8p)]	Protein	142
function=[Thermosome subunit]	Protein	1275
function=[SSU ribosomal protein S5p (S2e)]	Protein	421
function=[GTP-binding protein EngB]	Protein	156
function=[SSU ribosomal protein S16p]	Protein	147
function=[Membrane-associated protein containing a homolog of PilT-like ATPase N-terminal domai]	Protein	103
function=[Translation initiation factor 1]	Protein	364
function=[DNA repair protein RadA]	Protein	418
function=[GTP-binding protein EngA]	Protein	536
function=[Peptidyl-tRNA hydrolase (EC 3.1.1.29)]	Protein	186
function=[Ribosome-binding factor A]	Protein	47
function=[LSU ribosomal protein L11p (L12e)]	Protein	456
function=[ATP-dependent protease La (EC 3.4.21.53) Type II]	Protein	64
function=[LSU ribosomal protein L5p (L11e)]	Protein	534
function=[Urease beta subunit (EC 3.5.1.5)]	Protein	259
function=[selenocysteine-containing]	Protein	197
function=[ATP-dependent hsl protease ATP-binding subunit HslU]	Protein	1142
function=[SSU ribosomal protein S4p (S9e)]	Protein	424
function=[Aspartyl-tRNA(Asn) amidotransferase subunit A (EC 6.3.5.6)]	Protein	2347
function=[Dimethyladenosine transferase (EC 2.1.1.-)]	Protein	162
function=[putative periplasmic protein kinase ArgK and related GTPases of G3E family]	Protein	351
function=[Signal recognition particle receptor protein FtsY (=alpha subunit) (TC 3.A.5.1.1)]	Protein	867
function=[Putative ATP:guanido phosphotransferase YacI (EC 2.7.3.-)]	Protein	47
function=[Aminopeptidase C (EC 3.4.22.40)]	Protein	32
function=[LSU ribosomal protein L20p]	Protein	248
function=[Peptide chain release factor 1]	Protein	714
function=[Xaa-Pro aminopeptidase (EC 3.4.11.9)]	Protein	589
function=[Thermostable carboxypeptidase 1 (EC 3.4.17.19)]	Protein	159
function=[ATP-dependent Clp proteas]	Protein	662
function=[Asp-X dipeptidase]	Protein	50
function=[Ribosome small subunit-stimulated GTPase EngC]	Protein	28
function=[SSU ribosomal protein S9p (S16e)]	Protein	300
function=[SSU ribosomal protein S21p]	Protein	117
function=[Ribosomal large subunit pseudouridine synthase D (EC 4.2.1.70)]	Protein	307
function=[ater dikinase (EC 2.7.9.3)]	Protein	51
function=[Dipeptidyl carboxypeptidase Dcp (EC 3.4.15.5)]	Protein	348
function=[L-seryl-tRNA(Sec) selenium transferase (EC 2.9.1.1)]	Protein	352
function=[Translation elongation factor G]	Protein	3133
function=[Membrane alanine aminopeptidase N (EC 3.4.11.2)]	Protein	300
function=[LSU ribosomal protein L9p]	Protein	135
function=[Prolyl-tRNA synthetase (EC 6.1.1.15)]	Protein	1888
function=[ATP-dependent Clp protease ATP-binding subunit ClpX]	Protein	1472
function=[Methylmalonyl-CoA mutase (EC 5.4.99.2)]	Protein	5578
function=[Translation elongation factor LepA]	Protein	3182
function=[Aspartyl-tRNA(Asn) amidotransferase subunit B (EC 6.3.5.6)]	Protein	664
function=[LSU m5C1962 methyltransferase RlmI]	Protein	72
function=[SSU ribosomal protein S15p (S13e)]	Protein	170
function=[Translation elongation factor P]	Protein	362
function=[Glycine/sarcosine/betaine reductase component C chain 1]	Protein	14
function=[LSU ribosomal protein L15p (L27Ae)]	Protein	152
function=[Inactive homolog of metal-dependent protease]	Protein	23
function=[Peptide chain release factor 2]	Protein	523
function=[LSU ribosomal protein L17p]	Protein	287
function=[LSU ribosomal protein L35p]	Protein	42
function=[LSU ribosomal protein L4p (L1e)]	Protein	185
function=[SSU ribosomal protein S11p (S14e)]	Protein	293
function=[Ribosomal protein S12p Asp88 (E. coli) methylthiotransferase]	Protein	244
function=[Ribosomal subunit interface protein]	Protein	26
function=[Protein acetyltransferase]	Protein	100
function=[Lysyl-tRNA synthetase (class II) (EC 6.1.1.6)]	Protein	886
function=[GTP-binding protein TypA/BipA]	Protein	1111
function=[LSU ribosomal protein L13p (L13Ae)]	Protein	507
function=[Tryptophanyl-tRNA synthetase (EC 6.1.1.2)]	Protein	1282
function=[Microbial collagenas]	Protein	77
function=[SSU ribosomal protein S17p (S11e)]	Protein	147
function=[LSU ribosomal protein L6p (L9e)]	Protein	372
function=[ATP-dependent Clp protease proteolytic subunit (EC 3.4.21.92)]	Protein	766
function=[nvolved in Zn homeostasi]	Protein	58
function=[Prolyl endopeptidase (EC 3.4.21.26)]	Protein	299
function=[Translation elongation factor Tu]	Protein	2543
function=[Probable GTPase related to EngC]	Protein	51
function=[COG0536: GTP-binding protein Obg]	Protein	393
function=[Asparaginyl-tRNA synthetase (EC 6.1.1.22)]	Protein	622
function=[SSU ribosomal protein S2p (SAe)]	Protein	541
function=[SSU ribosomal protein S19p (S15e)]	Protein	301
function=[ATP-dependent protease HslV (EC 3.4.25.-)]	Protein	391
function=[Ribosome recycling factor]	Protein	355
function=[Ribosomal protein S6 glutaminyl transferase]	Protein	147
function=[Thimet oligopeptidase (EC 3.4.24.15)]	Protein	21
function=[imilar to the N-terminal domain of Lon protease]	Protein	21
function=[LSU ribosomal protein L3p (L3e)]	Protein	368
function=[Cytochrome c-type biogenesis protein CcmG/Dsb]	Protein	86
function=[SSU ribosomal protein S1p]	Protein	1222
function=[SSU ribosomal protein S6p]	Protein	107
function=[LSU ribosomal protein L7/L12 (P1/P2)]	Protein	222
function=[Uncharacterized protei]	Protein	40
function=[LSU ribosomal protein L1p (L10Ae)]	Protein	453
function=[LSU ribosomal protein L24p (L26e)]	Protein	160
function=[16S rRNA processing protein RimM]	Protein	56
function=[Glutamyl-tRNA synthetase (EC 6.1.1.17)]	Protein	615
function=[GTPase and tRNA-U34 5-formylation enzyme TrmE]	Protein	259
function=[Leucyl/phenylalanyl-tRNA--protein transferase (EC 2.3.2.6)]	Protein	247
function=[LSU ribosomal protein L25p]	Protein	117
function=[LSU ribosomal protein L36p]	Protein	48
function=[SSU ribosomal protein S14p (S29e)]	Protein	52
function=[ATP-dependent Clp protease adaptor protein ClpS]	Protein	223
function=[Peptidase B (EC 3.4.11.23)]	Protein	118
function=[Chaperone protein HtpG]	Protein	721
function=[Cytochrome c-type biogenesis protein Dsb]	Protein	189
function=[FKBP-type peptidyl-prolyl cis-trans isomerase fklB (EC 5.2.1.8)]	Protein	69
function=[SSU ribosomal protein S3p (S3e)]	Protein	510
function=[Thioredoxin]	Protein	1851
function=[GTP-binding protein Era]	Protein	305
function=[LSU ribosomal protein L14p (L23e)]	Protein	384
function=[Selenid]	Protein	135
function=[Alanyl-tRNA synthetase domain protein]	Protein	130
function=[Apolipoprotein N-acyltransferase (EC 2.3.1.-)]	Protein	202
function=[Arginine-tRNA-protein transferase (EC 2.3.2.8)]	Protein	54
function=[ATP-dependent Clp protease ATP-binding subunit ClpA]	Protein	1167
function=[ATP-dependent protease La (EC 3.4.21.53) Type I]	Protein	2279
function=[ATPas]	Protein	55
function=[CobW GTPase involved in cobalt insertion for B12 biosynthesis]	Protein	52
function=[D-alanyl-D-alanine carboxypeptidase (EC 3.4.16.4)]	Protein	481
function=[erine protease]	Protein	36
function=[FKBP-type peptidyl-prolyl cis-trans isomerase FkpA precursor (EC 5.2.1.8)]	Protein	44
function=[Glycyl-tRNA synthetase beta chain (EC 6.1.1.14)]	Protein	322
function=[Heat shock protein 60 family co-chaperone GroES]	Protein	518
function=[hypothetical protein sometimes fused to ribosomal protein S6 glutaminyl transferase]	Protein	28
function=[Lipoprotein signal peptidase (EC 3.4.23.36)]	Protein	142
function=[LSU ribosomal protein L10p (P0)]	Protein	82
function=[LSU ribosomal protein L18p (L5e)]	Protein	172
function=[LSU ribosomal protein L22p (L17e)]	Protein	130
function=[LSU ribosomal protein L28p]	Protein	162
function=[LSU ribosomal protein L30p (L7e)]	Protein	38
function=[LSU ribosomal protein L31p]	Protein	153
function=[LSU ribosomal protein L32p]	Protein	68
function=[LSU ribosomal protein L33p]	Protein	80
function=[Peptide chain release factor 3]	Protein	493
function=[Peptide deformylase (EC 3.5.1.88)]	Protein	370
function=[Peptidyl-prolyl cis-trans isomerase ppiA precursor (EC 5.2.1.8)]	Protein	134
function=[Peptidyl-prolyl cis-trans isomerase ppiC (EC 5.2.1.8)]	Protein	52
function=[programmed frameshift-containing]	Protein	96
function=[Putative metal chaperon]	Protein	52
function=[Ribosomal large subunit pseudouridine synthase C (EC 4.2.1.70)]	Protein	69
function=[Ribosomal-protein-S5p-alanine acetyltransferase]	Protein	25
function=[Ribosome hibernation protein YhbH]	Protein	48
function=[Selenoprotein O and cysteine-containing homologs]	Protein	389
function=[SSU ribosomal protein S10p (S20e)]	Protein	296
function=[TldD family protei]	Protein	47
function=[Xaa-Pro dipeptidase PepQ (EC 3.4.13.9)]	Protein	41
function=[NAD-dependent protein deacetylase of SIR2 family]	Protein	2217
function=[Urease accessory protein UreG]	Protein	414
function=[Ribonuclease E (EC 3.1.26.12)]	Protein	404
function=[Tyrosyl-tRNA synthetase (EC 6.1.1.1)]	Protein	1260
function=[Alanyl-tRNA synthetase (EC 6.1.1.7)]	Protein	2152
function=[Seryl-tRNA synthetase (EC 6.1.1.11)]	Protein	3120
function=[Signal recognition particl]	Protein	1316
function=[GTP-binding protein HflX]	Protein	1612
function=[Lysyl-tRNA synthetase (class I) (EC 6.1.1.6)]	Protein	906
function=[Phenylalanyl-tRNA synthetase alpha chain (EC 6.1.1.20)]	Protein	1452
function=[tRNA-i(6)A37 methylthiotransferase]	Protein	1159
function=[Aminopeptidase YpdF (MP]	Protein	702
function=[TldD protei]	Protein	639
function=[Cytosol aminopeptidase PepA (EC 3.4.11.1)]	Protein	2384
function=[Glutamyl-tRNA(Gln) synthetase (EC 6.1.1.24)]	Protein	638
function=[Histidyl-tRNA synthetase (EC 6.1.1.21)]	Protein	788
function=[Site-specific tyrosine recombinase]	Protein	62
function=[Chaperone protein DnaK]	Protein	8458
function=[Urease gamma subunit (EC 3.5.1.5)]	Protein	358
function=[Peptide methionine sulfoxide reductase MsrA (EC 1.8.4.11)]	Protein	1213
function=[LSU ribosomal protein L13Ae (L13p)]	Protein	95
function=[LSU ribosomal protein L3e (L3p)]	Protein	237
function=[Structure-specific tRNA-binding protein]	Protein	65
function=[SSU ribosomal protein S12p (S23e)]	Protein	444
function=[Peptidyl-prolyl cis-trans isomerase ppiD (EC 5.2.1.8)]	Protein	70
function=[Proteasome subunit beta (EC 3.4.25.1]	Protein	439
function=[Glycyl-tRNA synthetase (EC 6.1.1.14)]	Protein	1190
function=[Acetyl-coenzyme A synthetase (EC 6.2.1.1)]	Protein	13628
function=[Phenylalanyl-tRNA synthetase beta chain (EC 6.1.1.20)]	Protein	992
function=[Heat shock protein GrpE]	Protein	338
function=[LSU rRNA]	Protein	852
function=[Translation initiation factor 2]	Protein	1783
function=[rchaeal]	Protein	192
function=[Translation elongation factor 1 alpha subunit]	Protein	830
function=[SSU ribosomal protein S14e (S11p)]	Protein	62
function=[Isoleucyl-tRNA synthetase (EC 6.1.1.5)]	Protein	2908
function=[Arginyl-tRNA synthetase (EC 6.1.1.19)]	Protein	1283
function=[Signal peptidase I (EC 3.4.21.89)]	Protein	563
function=[Aspartyl-tRNA synthetase (EC 6.1.1.12)]	Protein	1347
function=[art of proposed TldE/TldD proteolytic complex (PMID 12029038)]	Protein	345
function=[Ribosomal-protein-S18p-alanine acetyltransferase (EC 2.3.1.-)]	Protein	172
function=[Valyl-tRNA synthetase (EC 6.1.1.9)]	Protein	3019
function=[SSU ribosomal protein S23e (S12p)]	Protein	200
function=[Glutamyl-tRNA(Gln) amidotransferase asparaginase subunit (EC 6.3.5.7)]	Protein	580
function=[Glutamyl-tRNA(Gln) amidotransferase transferase subunit (EC 6.3.5.7)]	Protein	406
function=[LSU ribosomal protein L12e (L11p)]	Protein	188
function=[LSU ribosomal protein L23e (L14p)]	Protein	170
function=[Eukaryotic translation initiation factor 5]	Protein	159
function=[LSU ribosomal protein L11e (L5p)]	Protein	123
function=[LSU ribosomal protein L7Ae]	Protein	157
function=[SSU ribosomal protein S16e (S9p)]	Protein	60
function=[Foldase protein PrsA precursor (EC 5.2.1.8)]	Protein	104
function=[Aspartyl-tRNA(Asn) synthetase (EC 6.1.1.23)]	Protein	906
function=[Eukaryotic peptide chain release factor subunit 1]	Protein	385
function=[Eukaryotic translation initiation factor 2 alpha subunit]	Protein	153
function=[Eukaryotic translation initiation factor 2 beta subunit]	Protein	63
function=[Eukaryotic translation initiation factor 6]	Protein	95
function=[Glutamyl-tRNA(Gln) amidotransferase subunit C (EC 6.3.5.7)]	Protein	57
function=[LSU ribosomal protein L10Ae (L1p)]	Protein	115
function=[LSU ribosomal protein L10e (L16p)]	Protein	152
function=[LSU ribosomal protein L12a (P1/P2)]	Protein	46
function=[LSU ribosomal protein L15e]	Protein	111
function=[LSU ribosomal protein L17e (L22p)]	Protein	121
function=[LSU ribosomal protein L18e]	Protein	34
function=[LSU ribosomal protein L19e]	Protein	73
function=[LSU ribosomal protein L1e (L4p)]	Protein	100
function=[LSU ribosomal protein L21e]	Protein	68
function=[LSU ribosomal protein L23Ae (L23p)]	Protein	80
function=[LSU ribosomal protein L24e]	Protein	22
function=[LSU ribosomal protein L26e (L24p)]	Protein	51
function=[LSU ribosomal protein L27Ae (L15p)]	Protein	48
function=[LSU ribosomal protein L30e]	Protein	23
function=[LSU ribosomal protein L32e]	Protein	58
function=[LSU ribosomal protein L44e]	Protein	41
function=[LSU ribosomal protein L5e (L18p)]	Protein	57
function=[LSU ribosomal protein L7e (L30p)]	Protein	54
function=[LSU ribosomal protein L8e (L2p)]	Protein	169
function=[LSU ribosomal protein P0 (L10p)]	Protein	144
function=[Methionine aminopeptidase (EC 3.4.11.18)]	Protein	955
function=[SSU ribosomal protein S13e (S15p)]	Protein	96
function=[SSU ribosomal protein S15e (S19p)]	Protein	155
function=[SSU ribosomal protein S18e (S13p)]	Protein	142
function=[SSU ribosomal protein S19e]	Protein	124
function=[SSU ribosomal protein S20e (S10p)]	Protein	75
function=[SSU ribosomal protein S26e]	Protein	44
function=[SSU ribosomal protein S27e]	Protein	18
function=[SSU ribosomal protein S28e]	Protein	118
function=[SSU ribosomal protein S2e (S5p)]	Protein	152
function=[SSU ribosomal protein S3Ae]	Protein	154
function=[SSU ribosomal protein S3e (S3p)]	Protein	195
function=[SSU ribosomal protein S4e]	Protein	105
function=[SSU ribosomal protein S5e (S7p)]	Protein	332
function=[SSU ribosomal protein S6e]	Protein	85
function=[SSU ribosomal protein S8e]	Protein	116
function=[SSU ribosomal protein S9e (S4p)]	Protein	192
function=[SSU ribosomal protein SAe (S2p)]	Protein	289
function=[Translation elongation factor 1 alpha-related protein]	Protein	142
function=[Translation elongation factor 1 beta subunit]	Protein	33
function=[Translation elongation factor 2]	Protein	806
function=[Glutamyl-tRNA(Gln) amidotransferase subunit B (EC 6.3.5.7)]	Protein	952
function=[Threonyl-tRNA synthetase (EC 6.1.1.3)]	Protein	2344
function=[N-acetylgalactosamine 6-sulfate sulfatase (GALNS)]	Protein	80
function=[4-keto-6-deoxy-N-Acetyl-D-hexosaminyl-(Lipid carrier) aminotransferase]	Protein	153
function=[Translation elongation factor G-related protein]	Protein	297
function=[TldD-domain protein]	Protein	16
function=[putative succinate dehydrogenase [membrane anchor subunit] (succinic dehydrogenase)]	Respiration	19
function=[Menaquinone-cytochrome c reductas]	Respiration	109
function=[Cytochrome d ubiquinol oxidase subunit I (EC 1.10.3.-)]	Respiration	103
function=[Cytochrome d ubiquinol oxidase subunit II (EC 1.10.3.-)]	Respiration	33
function=[Cytochrome c heme lyase subunit CcmF]	Respiration	613
function=[NAD-dependent formate dehydrogenase gamma subunit]	Respiration	17
function=[Cytochrome c-type biogenesis protein CcsA/ResC]	Respiration	28
function=[Fe-S-cluster-containing hydrogenase components 1]	Respiration	199
function=[CoB--CoM heterodisulfide reductase subunit A (EC 1.8.98.1)]	Respiration	34
function=[Flavodoxin reductases (ferredoxin-NADPH reductases) family 1]	Respiration	246
function=[Cytochrome c551/c552]	Respiration	43
function=[Glycerol-3-phosphate dehydrogenase (EC 1.1.5.3)]	Respiration	178
function=[Ferredoxin reductase]	Respiration	121
function=[Anaerobic dehydrogenase]	Respiration	796
function=[NADH-ubiquinone oxidoreductase chain L (EC 1.6.5.3)]	Respiration	3491
function=[lpha chain (EC 4.1.1.41)]	Respiration	119
function=[V-type ATP synthase subunit A (EC 3.6.3.14)]	Respiration	1507
function=[V-type ATP synthase subunit B (EC 3.6.3.14)]	Respiration	1690
function=[Thiol:disulfide oxidoreductase related to ResA]	Respiration	63
function=[Periplasmic [Fe] hydrogenase (EC 1.12.7.2)]	Respiration	60
function=[NAD-reducing hydrogenase subunit HoxF (EC 1.12.1.2)]	Respiration	88
function=[ATP synthase beta chain (EC 3.6.3.14)]	Respiration	1474
function=[Putative formate dehydrogenase oxidoreductase protein]	Respiration	422
function=[ATP synthase A chain (EC 3.6.3.14)]	Respiration	280
function=[Methanol dehydrogenase large subunit protein (EC 1.1.99.8)]	Respiration	166
function=[Ubiquinol-cytochrome C reductase iron-sulfur subunit (EC 1.10.2.2)]	Respiration	140
function=[ATP synthase C chain (EC 3.6.3.14)]	Respiration	65
function=[carbon monoxide dehydrogenase E protein]	Respiration	217
function=[Carbon monoxide dehydrogenase medium chain (EC 1.2.99.2)]	Respiration	220
function=[ATP synthase gamma chain (EC 3.6.3.14)]	Respiration	420
function=[Cytochrome c oxidase subunit CcoO (EC 1.9.3.1)]	Respiration	60
function=[Fumarate reductase flavoprotein subunit (EC 1.3.99.1)]	Respiration	177
function=[ctinobacterial (eukaryote-like) type (EC 1.18.1.2)]	Respiration	41
function=[Signal transduction histidine kinase HoxJ (hydrogenase regulation)]	Respiration	87
function=[Adenylylsulfate reductase beta-subunit (EC 1.8.99.2)]	Respiration	118
function=[ATP synthase alpha chain (EC 3.6.3.14)]	Respiration	1496
function=[CoB--CoM heterodisulfide reductase subunit B (EC 1.8.98.1)]	Respiration	24
function=[Anaerobic dimethyl sulfoxide reductase chain A (EC 1.8.99.-)]	Respiration	344
function=[Thiol:disulfide oxidoreductase TlpA]	Respiration	39
function=[Trimethylamine-N-oxide reductase (EC 1.6.6.9)]	Respiration	42
function=[Cytochrome c oxidase subunit CcoN (EC 1.9.3.1)]	Respiration	209
function=[Cytochrome oxidase biogenesis protein Sco1/SenC/Prr]	Respiration	56
function=[Succinate dehydrogenase flavoprotein subunit (EC 1.3.99.1)]	Respiration	6084
function=[Carbon monoxide dehydrogenase form]	Respiration	114
function=[Carbon monoxide dehydrogenase large chain (EC 1.2.99.2)]	Respiration	1471
function=[Quinone oxidoreductase (EC 1.6.5.5)]	Respiration	670
function=[Aerobic glycerol-3-phosphate dehydrogenase (EC 1.1.5.3)]	Respiration	384
function=[Carbon monoxide dehydrogenase small chain (EC 1.2.99.2)]	Respiration	574
function=[Glucose-methanol-choline (GMC) oxidoreductase:NAD binding site]	Respiration	665
function=[arge chain( EC:1.2.99.2 )]	Respiration	54
function=[ATP synthase B chain (EC 3.6.3.14)]	Respiration	28
function=[carbon monoxide dehydrogenase D protein]	Respiration	418
function=[Putative NADP-dependent oxidoreductase PA1648]	Respiration	55
function=[Tetrathionate reductase subunit B]	Respiration	70
function=[Putative diheme cytochrome c-553]	Respiration	58
function=[NAD-dependent formate dehydrogenase alpha subunit]	Respiration	208
function=[NADH-ubiquinone oxidoreductase chain K (EC 1.6.5.3)]	Respiration	309
function=[putative Cytochrome bd]	Respiration	25
function=[QQ-dependent (EC 1.1.5.2)]	Respiration	202
function=[Arsenate reductase (EC 1.20.4.1)]	Respiration	114
function=[Alternative cytochrome c oxidase polypeptide CoxO (EC 1.9.3.1)]	Respiration	43
function=[hiol:disulfide oxidoreductase]	Respiration	86
function=[Yhd]	Respiration	126
function=[L-lactate dehydrogenase (EC 1.1.2.3)]	Respiration	448
function=[Formate dehydrogenase O alpha subunit (EC 1.2.1.2)]	Respiration	51
function=[NADH-ubiquinone oxidoreductase chain G (EC 1.6.5.3)]	Respiration	743
function=[Alternative cytochrome c oxidase polypeptide CoxP (EC 1.9.3.1)]	Respiration	266
function=[Na(+)-translocating NADH-quinone reductase subunit B (EC 1.6.5.-)]	Respiration	257
function=[Putative Zn-dependent oxidoreductase PA5234]	Respiration	85
function=[rotein-disulfide reductase (EC 1.8.1.8)]	Respiration	189
function=[NADH-ubiquinone oxidoreductase chain J (EC 1.6.5.3)]	Respiration	190
function=[Putative oxidoreductase YncB]	Respiration	165
function=[ABC transporter involved in cytochrome c biogenesi]	Respiration	148
function=[ajor subunit (EC 1.2.1.2)]	Respiration	329
function=[Alternative cytochrome c oxidase polypeptide CoxM (EC 1.9.3.1)]	Respiration	319
function=[Alternative cytochrome c oxidase polypeptide CoxN (EC 1.9.3.1)]	Respiration	1363
function=[Anaerobic dimethyl sulfoxide reductase chain B (EC 1.8.99.-)]	Respiration	102
function=[Anaerobic glycerol-3-phosphate dehydrogenase subunit C (EC 1.1.5.3)]	Respiration	26
function=[ATP synthase delta chain (EC 3.6.3.14)]	Respiration	30
function=[ATP synthase epsilon chain (EC 3.6.3.14)]	Respiration	144
function=[Carbon monoxide dehydrogenase F protein]	Respiration	84
function=[carbon monoxide dehydrogenase G protein]	Respiration	78
function=[Carbon monoxide dehydrogenase large chain (EC 1.2.99.2) parolog without usual motifs]	Respiration	60
function=[Carbon-monoxide dehydrogenase form I]	Respiration	216
function=[CO dehydrogenases maturation facto]	Respiration	29
function=[Cytochrome c heme lyase subunit CcmH]	Respiration	9
function=[Cytochrome c heme lyase subunit CcmL]	Respiration	39
function=[Cytochrome c oxidase (B(O/a)3-type) chain I (EC 1.9.3.1)]	Respiration	76
function=[Cytochrome c oxidase polypeptide III (EC 1.9.3.1)]	Respiration	382
function=[Cytochrome c oxidase subunit CcoP (EC 1.9.3.1)]	Respiration	42
function=[Cytochrome c-type biogenesis protein Ccm]	Respiration	325
function=[Cytochrome c2]	Respiration	24
function=[Cytochrome c4]	Respiration	41
function=[Cytochrome oxidase biogenesis protein Cox11-Cta]	Respiration	53
function=[D-amino acid dehydrogenase (EC 1.4.99.1) family protein in hydroxy-L-proline catabolic cluster]	Respiration	30
function=[D-amino acid dehydrogenase small subunit (EC 1.4.99.1)]	Respiration	294
function=[Electron transport complex protein RnfA]	Respiration	100
function=[Electron transport complex protein RnfC]	Respiration	39
function=[Electron transport complex protein RnfD]	Respiration	106
function=[Electron transport complex protein RnfG]	Respiration	25
function=[Formate dehydrogenase -]	Respiration	88
function=[Formate dehydrogenase chain D (EC 1.2.1.2)]	Respiration	250
function=[Formate dehydrogenase-]	Respiration	622
function=[Formate hydrogenlyase transcriptional activator]	Respiration	460
function=[Hydrogenase-4 transcriptional activator]	Respiration	98
function=[Na(+)-translocating NADH-quinone reductase subunit A (EC 1.6.5.-)]	Respiration	171
function=[Na(+)-translocating NADH-quinone reductase subunit D (EC 1.6.5.-)]	Respiration	174
function=[Na(+)-translocating NADH-quinone reductase subunit E (EC 1.6.5.-)]	Respiration	171
function=[Na(+)-translocating NADH-quinone reductase subunit F (EC 1.6.5.-)]	Respiration	356
function=[NAD-dependent formate dehydrogenase (EC 1.2.1.2)]	Respiration	245
function=[NAD-dependent formate dehydrogenase beta subunit]	Respiration	90
function=[NADH ubiquinone oxidoreductase chain A (EC 1.6.5.3)]	Respiration	295
function=[NADH-ubiquinone oxidoreductase chain E (EC 1.6.5.3)]	Respiration	134
function=[NADH-ubiquinone oxidoreductase chain F (EC 1.6.5.3)]	Respiration	965
function=[NADH-ubiquinone oxidoreductase chain M (EC 1.6.5.3)]	Respiration	1256
function=[opper delivery to Cox1]	Respiration	58
function=[Oxaloacetate decarboxylase beta chain (EC 4.1.1.3)]	Respiration	182
function=[Periplasmic thiol:disulfide interchange protein DsbA]	Respiration	154
function=[Periplasmic thiol:disulfide oxidoreductase Dsb]	Respiration	57
function=[Proline dehydrogenase (EC 1.5.99.8) (Proline oxidase)]	Respiration	1069
function=[Putative cytochrome C-type biogenesis protein]	Respiration	47
function=[Putative formate dehydrogenase iron-sulfur subunit (EC 1.2.1.2)]	Respiration	78
function=[Putative formate dehydrogenase-specific chaperone]	Respiration	27
function=[Putative oxidoreductase SMc00968]	Respiration	18
function=[Sulfite reductase beta subunit (EC 1.8.99.1)]	Respiration	52
function=[Transport ATP-binding protein CydC]	Respiration	136
function=[Trimethylamine-N-oxide reductase (Cytochrome c) (EC 1.7.2.3)]	Respiration	40
function=[tungsten-containing formate dehydrogenase alpha subunit]	Respiration	914
function=[tungsten-containing formate dehydrogenase beta subunit]	Respiration	386
function=[ubiquinol cytochrome C oxidoreductas]	Respiration	168
function=[Heme A synthas]	Respiration	214
function=[rotoheme IX farnesyltransferase (EC 2.5.1.-) COX10-CtaB]	Respiration	593
function=[NADH-ubiquinone oxidoreductase chain D (EC 1.6.5.3)]	Respiration	2366
function=[Heme O synthas]	Respiration	428
function=[NADH-ubiquinone oxidoreductase chain N (EC 1.6.5.3)]	Respiration	1901
function=[NADH-ubiquinone oxidoreductase chain B (EC 1.6.5.3)]	Respiration	1257
function=[Fe-2S]	Respiration	400
function=[NAD(P)H-quinone oxidoreductase chain 1]	Respiration	68
function=[NADH-ubiquinone oxidoreductase chain I (EC 1.6.5.3)]	Respiration	580
function=[Ubiquinol--cytochrome c reductas]	Respiration	1151
function=[V-type ATP synthase subunit K (EC 3.6.3.14)]	Respiration	120
function=[Glycerol-1-phosphate dehydrogenase [NAD(P)] (EC 1.1.1.261)]	Respiration	307
function=[V-type ATP synthase subunit D (EC 3.6.3.14)]	Respiration	158
function=[V-type ATP synthase subunit I (EC 3.6.3.14)]	Respiration	482
function=[Cytochrome c oxidase polypeptide II (EC 1.9.3.1)]	Respiration	413
function=[NADH-ubiquinone oxidoreductase chain H (EC 1.6.5.3)]	Respiration	1283
function=[NADH-ubiquinone oxidoreductase chain C (EC 1.6.5.3)]	Respiration	694
function=[Biotin carboxyl carrier protein of methylmalonyl-CoA decarboxylase]	Respiration	53
function=[cytochrome b-5]	Respiration	149
function=[NAD(P)H-quinone oxidoreductase chain J (EC 1.6.5.2)]	Respiration	146
function=[NAD(P)H-quinone oxidoreductase subunit 3 (EC 1.6.5.2)]	Respiration	63
function=[NADH dehydrogenase subunit 4L]	Respiration	86
function=[Succinate dehydrogenase hydrophobic membrane anchor protein]	Respiration	207
function=[UPF0129 protein MJ1474]	Respiration	66
function=[V-type ATP synthase subunit C (EC 3.6.3.14)]	Respiration	181
function=[V-type ATP synthase subunit E (EC 3.6.3.14)]	Respiration	77
function=[Cytochrome c oxidase polypeptide I (EC 1.9.3.1)]	Respiration	2515
function=[Cytochrome O ubiquinol oxidase subunit I (EC 1.10.3.-)]	Respiration	24
function=[MiaB family protei]	Stress	364
function=[ranscriptional repressor of DnaK operon]	Stress	25
function=[imilarity with CPO of BS HemN-type]	Stress	30
function=[Glutamate decarboxylase (EC 4.1.1.15)]	Stress	35
function=[Formaldehyde dehydrogenase Msc]	Stress	41
function=[Sarcosine N-methyltransferase]	Stress	26
function=[Sarcosine oxidase delta subunit (EC 1.5.3.1)]	Stress	104
function=[tmRNA-binding protein SmpB]	Stress	738
function=[Cold shock protein CspG]	Stress	143
function=[Redox-sensitive transcriptional regulator (AT-rich DNA-binding protein)]	Stress	50
function=[Starvation sensing protein RspA]	Stress	77
function=[Glutathione peroxidase (EC 1.11.1.9)]	Stress	62
function=[Uncharacterized monothiol glutaredoxin ycf64-like]	Stress	86
function=[Phytochrom]	Stress	83
function=[Chaperone protein DnaJ]	Stress	2564
function=[Xanthosine/inosine triphosphate pyrophosphatase]	Stress	73
function=[Universal stress protein family]	Stress	49
function=[Aquaporin Z]	Stress	248
function=[Osmotically activated L-carnitine/choline ABC transporte]	Stress	37
function=[Signal peptidase-like protein]	Stress	45
function=[Cold shock protein CspD]	Stress	56
function=[High-affinity choline uptake protein BetT]	Stress	153
function=[Cold shock protein CspA]	Stress	388
function=[Intramembrane protease RasP/Ylu]	Stress	141
function=[D-tyrosyl-tRNA(Tyr) deacylase]	Stress	155
function=[OT coproporphyrinogen III oxidas]	Stress	24
function=[L-proline glycine betaine ABC transport system permease protein ProV (TC 3.A.1.12.1)]	Stress	320
function=[Carbon starvation protein A]	Stress	276
function=[Choline-sulfatase (EC 3.1.6.6)]	Stress	571
function=[Ribosomal RNA small subunit methyltransferase E (EC 2.1.1.-)]	Stress	35
function=[Glycine betaine ABC transport syste]	Stress	96
function=[Peroxidase (EC 1.11.1.7)]	Stress	797
function=[Ornithine aminotransferase (EC 2.6.1.13)]	Stress	639
function=[NAD-dependent glyceraldehyde-3-phosphate dehydrogenase (EC 1.2.1.12)]	Stress	1639
function=[RNA polymerase sigma factor]	Stress	2403
function=[rRNA small subunit methyltransferase I]	Stress	186
function=[Ribosomal protein L11 methyltransferase (EC 2.1.1.-)]	Stress	114
function=[diguanylate cyclase/phosphodiesterase (GGDEF & EAL domains) with PAS/PAC sensor(s)]	Stress	491
function=[Glutathione S-transferase family protein]	Stress	112
function=[Arginine decarboxylase (EC 4.1.1.19)]	Stress	104
function=[Superoxide dismutase [Fe] (EC 1.15.1.1)]	Stress	170
function=[Glycine betaine transporter OpuD]	Stress	71
function=[IT]	Stress	95
function=[Betaine aldehyde dehydrogenase (EC 1.2.1.8)]	Stress	92
function=[HflC protein]	Stress	225
function=[Cytochrome c551 peroxidase (EC 1.11.1.5)]	Stress	168
function=[L-proline glycine betaine binding ABC transporter protein ProX (TC 3.A.1.12.1)]	Stress	241
function=[Flavohemoprotein (Hemoglobin-like protein) (Flavohemoglobin) (Nitric oxide dioxygenase) (EC 1.14.12.17)]	Stress	74
function=[Phage shock protein A]	Stress	48
function=[Nicotinamidase (EC 3.5.1.19)]	Stress	169
function=[Cold shock protein CspC]	Stress	107
function=[Hydrogen peroxide-inducible genes activator]	Stress	58
function=[wo-component sensor histidine kinase (EC 2.7.3.-)]	Stress	92
function=[Nicotinate phosphoribosyltransferase (EC 2.4.2.11)]	Stress	317
function=[HtrA protease/chaperone protein]	Stress	548
function=[N]	Stress	81
function=[Rubredoxin]	Stress	52
function=[Uncharacterized glutathione S-transferase-like protein]	Stress	63
function=[Ferric uptake regulation protein FUR]	Stress	65
function=[Outer membrane stress sensor protease DegS]	Stress	160
function=[5-oxoprolinase (EC 3.5.2.9)]	Stress	895
function=[Biosynthetic arginine decarboxylase (EC 4.1.1.19)]	Stress	490
function=[Carbon storage regulator]	Stress	98
function=[Choline dehydrogenase (EC 1.1.99.1)]	Stress	586
function=[Cold shock protein CspE]	Stress	56
function=[Cyclic beta-]	Stress	81
function=[Ferric uptake regulation protein]	Stress	76
function=[FIG001341: Probable Fe(2+)-trafficking protein YggX]	Stress	49
function=[FIG005121: SAM-dependent methyltransferase (EC 2.1.1.-)]	Stress	11
function=[Fumarate and nitrate reduction regulatory protein]	Stress	24
function=[Glutamate--cysteine ligase (EC 6.3.2.2)]	Stress	382
function=[Glutaredoxin]	Stress	73
function=[Glutathione reductase (EC 1.8.1.7)]	Stress	322
function=[Glutathione S-transferas]	Stress	580
function=[Glutathione S-transferase (EC 2.5.1.18)]	Stress	1367
function=[Glutathione synthetase (EC 6.3.2.3)]	Stress	495
function=[Glutathione-dependent formaldehyde-activating enzyme (EC 4.4.1.22)]	Stress	99
function=[Heat-inducible transcription repressor HrcA]	Stress	293
function=[HflK protein]	Stress	417
function=[imilar to coproporphyrinogen III oxidas]	Stress	44
function=[Iron-responsive regulator Irr]	Stress	63
function=[L-proline glycine betaine ABC transport system permease protein ProW (TC 3.A.1.12.1)]	Stress	194
function=[lustered with nucleoside-triphosphatase RdgB]	Stress	44
function=[mplicated in cell division based on FtsL cleavage]	Stress	201
function=[NnrS protein involved in response to NO]	Stress	74
function=[Outer membrane stress sensor protease Deg]	Stress	41
function=[Paraquat-inducible protein A]	Stress	57
function=[Paraquat-inducible protein B]	Stress	37
function=[Psp operon transcriptional activator]	Stress	65
function=[Radical SAM family enzym]	Stress	40
function=[Ribosome-associated heat shock protein implicated in the recycling of the 50S subunit (S4 paralog)]	Stress	41
function=[RNA polymerase sigma factor RpoH]	Stress	339
function=[RNA-binding protein Hfq]	Stress	135
function=[Rubrerythrin]	Stress	258
function=[S-(hydroxymethyl)glutathione dehydrogenase (EC 1.1.1.284)]	Stress	657
function=[S-formylglutathione hydrolase (EC 3.1.2.12)]	Stress	119
function=[Sarcosine oxidase alpha subunit (EC 1.5.3.1)]	Stress	861
function=[Sarcosine oxidase beta subunit (EC 1.5.3.1)]	Stress	707
function=[Serine phosphatase Rsb]	Stress	344
function=[Stringent starvation protein A]	Stress	73
function=[Survival protein SurA precursor (Peptidyl-prolyl cis-trans isomerase SurA) (EC 5.2.1.8)]	Stress	128
function=[transcriptional regulato]	Stress	114
function=[Transcriptional regulato]	Stress	114
function=[uinol-dependent]	Stress	26
function=[Various polyols ABC transporte]	Stress	134
function=[xygen-independen]	Stress	51
function=[Zinc uptake regulation protein ZUR]	Stress	38
function=[Nucleoside 5-triphosphatase RdgB (dHAPT]	Stress	261
function=[Ribonuclease PH (EC 2.7.7.56)]	Stress	1038
function=[Gamma-glutamyltranspeptidase (EC 2.3.2.2)]	Stress	4938
function=[Cystathionine gamma-synthase (EC 2.5.1.48)]	Sulfur	457
function=[Arylsulfatase (EC 3.1.6.1)]	Sulfur	5262
function=[Taurine transport ATP-binding protein TauB]	Sulfur	93
function=[Beta-galactosidase (EC 3.2.1.23)]	Sulfur	222
function=[Sulfate permeas]	Sulfur	34
function=[px-type (EC 1.11.1.15)]	Sulfur	49
function=[Alkyl hydroperoxide reductase subunit C-like protein]	Sulfur	1916
function=[Sulfate adenylyltransferas]	Sulfur	1433
function=[ABC-type nitrate/sulfonate/bicarbonate transport syste]	Sulfur	205
function=[Sulfite reductase [NADPH] flavoprotein alpha-component (EC 1.8.1.2)]	Sulfur	102
function=[ABC-type probable sulfate transporte]	Sulfur	622
function=[Ferredoxin--sulfite reductase (EC 1.8.7.1)]	Sulfur	40
function=[4Fe-4S ferredoxi]	Sulfur	411
function=[Sulfate adenylyltransferase subunit 1 (EC 2.7.7.4)]	Sulfur	404
function=[Sialidase (EC 3.2.1.18)]	Sulfur	11
function=[Thioredoxin reductase (EC 1.8.1.9)]	Sulfur	2337
function=[SoxH protei]	Sulfur	64
function=[3''(2'']	Sulfur	278
function=[Ferredoxin--NADP(+) reductas]	Sulfur	97
function=[Ferredoxi]	Sulfur	226
function=[Adenylyl-sulfate reductase [thioredoxin] (EC 1.8.4.10)]	Sulfur	295
function=[Sulfate adenylyltransferase subunit 2 (EC 2.7.7.4)]	Sulfur	672
function=[Alpha-ketoglutarate-dependent taurine dioxygenase (EC 1.14.11.17)]	Sulfur	329
function=[Alkanesulfonates ABC transporter ATP-binding protein]	Sulfur	41
function=[Sulfite oxidase]	Sulfur	433
function=[Sulfite dehydrogenase cytochrome subunit SoxD]	Sulfur	30
function=[Sulfite reductase [NADPH] hemoprotein beta-component (EC 1.8.1.2)]	Sulfur	820
function=[Adenylylsulfate reductase alpha-subunit (EC 1.8.99.2)]	Sulfur	482
function=[Alkyl hydroperoxide reductase protein C (EC 1.6.4.-)]	Sulfur	16
function=[DMSP demethylase EC 2.1.2.10]	Sulfur	94
function=[Oxidoreductase probably involved in sulfite reduction]	Sulfur	11
function=[Putative glutathione transporte]	Sulfur	286
function=[Putative gluthatione transporte]	Sulfur	84
function=[Sulfite reduction-associated complex DsrMKJOP protein DsrK (=HmeD)]	Sulfur	61
function=[Sulfur oxidation molybdopterin C protein]	Sulfur	145
function=[Sulfur oxidation protein SoxB]	Sulfur	61
function=[Taurine transport system permease protein TauC]	Sulfur	18
function=[cp-type (EC 1.11.1.15)]	Sulfur	125
function=[Thiol peroxidas]	Sulfur	323
function=[FMN reductase (EC 1.5.1.29)]	Sulfur	95
function=[Ferredoxin]	Sulfur	5134
function=[Sulfate and thiosulfate import ATP-binding protein CysA (EC 3.6.3.25)]	Sulfur	1143
function=[Sulfite reduction-associated complex DsrMKJOP protein DsrP (= HmeB)]	Sulfur	15

## Sheet: Table IV
Supplementary Table IV. Unique genes SEED-subsystem classification and taxonomic affiliation throughout metagenomes.
Name	SEED subsystem	Taxa	Sample
function=[L-allo-threonine aldolase (EC 2.1.2.1)]	Amino acids	Acidobacteria	E2
function=[Aspartate--ammonia ligase (EC 6.3.1.1)]	Amino acids	Acidobacteria	E46
function=[Methionine ABC transporter permease protein]	Amino acids	Actinobacteria	E2
function=[Lysine 2-monooxygenase (EC 1.13.12.2)]	Amino acids	Actinobacteria	E7
function=[Putative oxidoreductase in 4-hydroxyproline catabolic gene cluster]	Amino acids	Actinobacteria	E7
function=[Quinate/shikimate 5-dehydrogenase I delta (EC 1.1.1.25)]	Amino acids	Actinobacteria	E7
function=[Arginine/ornithine antiporter]	Amino acids	Actinobacteria	E44
function=[Probable reactivating factor for D-ornithine aminomutase]	Amino acids	Actinobacteria	E44
function=[Aromatic ring-opening dioxygenase]	Amino acids	Actinobacteria	E46
function=[Partial urea carboxylase (EC 6.3.4.6)]	Amino acids	Actinobacteria	E47
function=[Serine hydroxymethyltransferase 1 (EC 2.1.2.1)]	Amino acids	Actinobacteria	E47
function=[Urea carboxylase (EC 6.3.4.6) without Allophanate hydrolase 2 domains]	Amino acids	Actinobacteria	E47
function=[L-beta-lysine]	Amino acids	Bacteroidetes	E7
function=[Urease accessory protein UreE]	Amino acids	Bacteroidetes	E7
function=[Formiminoglutamase (EC 3.5.3.8)]	Amino acids	Bacteroidetes	E44
function=[threonine dehydrogenase]	Amino acids	Bacteroidetes	E44
function=[2-keto-3-deoxy-D-arabino-heptulosonate-7-phosphate synthase II PhzC (EC 2.5.1.54)]	Amino acids	Bacteroidetes	E46
function=[Carboxynorspermidine dehydrogenas]	Amino acids	Bacteroidetes	E46
function=[L-allo-threonine aldolase]	Amino acids	Bacteroidetes	E47
function=[Homoaconitase small subunit (EC 4.2.1.36)]	Amino acids	Chloroflexi	E2
function=[Ketoisovalerate oxidoreductase subunit VorA (EC 1.2.7.7)]	Amino acids	Euryarchaeota	E7
function=[Butyrate-acetoacetate CoA-transferase subunit A (EC 2.8.3.9)]	Amino acids	Firmicutes	E2
function=[Mercuric ion reductase (EC 1.16.1.1)]	Amino acids	Firmicutes	E2
function=[Spermidine N1-acetyltransferase (EC 2.3.1.57)]	Amino acids	Firmicutes	E2
function=[Aldehyde dehydrogenase (EC 1.2.1.3) in 4-hydroxyproline catabolic gene cluster]	Amino acids	Firmicutes	E7
function=[Poly-gamma-glutamate synthase subunit PgsA/CapA (EC 6.3.2.-)]	Amino acids	Firmicutes	E7
function=[Asparagine synthetase [glutamine-hydrolyzing] (EC 6.3.5.4) AsnB]	Amino acids	Firmicutes	E44
function=[Glutamate-aspartate carrier protein]	Amino acids	Firmicutes	E44
function=[Methionine transporter MetT]	Amino acids	Firmicutes	E46
function=[Putative Dihydrolipoamide dehydrogenase (EC 1.8.1.4)]	Amino acids	Firmicutes	E46
function=[L-lysine aminomutase regulator]	Amino acids	Firmicutes	E47
function=[2-Oxobutyrate dehydrogenase E1 (EC:1.2.4.1)]	Amino acids	Proteobacteria	E2
function=[Cytosine permease]	Amino acids	Proteobacteria	E2
function=[D-serine dehydratase transcriptional activator]	Amino acids	Proteobacteria	E2
function=[Predicted transcriptional regulator of leucine degradation pathwa]	Amino acids	Proteobacteria	E2
function=[5''-methylthioadenosine nucleosidase (EC 3.2.2.16)]	Amino acids	Proteobacteria	E7
function=[minase component (EC 2.6.1.85)]	Amino acids	Proteobacteria	E7
function=[Predicted regulator of methionine metabolis]	Amino acids	Proteobacteria	E7
function=[Putative GntR-family regulatory protein and aminotransferase near polyamine transporter]	Amino acids	Proteobacteria	E7
function=[Substrate-specific component MtsA of methionine-regulated ECF transporter]	Amino acids	Proteobacteria	E7
function=[Sulfate transport system permease protein CysW]	Amino acids	Proteobacteria	E7
function=[thanolamine utilization-specific]	Amino acids	Proteobacteria	E7
function=[Transcriptional activator of cad operon]	Amino acids	Proteobacteria	E7
function=[Transmembrane component MtsC of energizing module of methionine-regulated ECF transporter]	Amino acids	Proteobacteria	E7
function=[Arogenate dehydratase (EC 4.2.1.91)]	Amino acids	Proteobacteria	E44
function=[Cyanophycin synthase II]	Amino acids	Proteobacteria	E44
function=[D-amino-acid oxidase (EC 1.4.3.3)]	Amino acids	Proteobacteria	E44
function=[DNA-binding response regulato]	Amino acids	Proteobacteria	E44
function=[Kynurenine formamidase (EC 3.5.1.9)]	Amino acids	Proteobacteria	E44
function=[Putative N-carbamyl-L-cysteine amidohydrolase]	Amino acids	Proteobacteria	E44
function=[Urea channel UreI]	Amino acids	Proteobacteria	E44
function=[-dihydroxy-2-butanone 4-phosphate synthase]	Amino acids	Proteobacteria	E46
function=[Duplicated ATPase component MtsB of energizing module of methionine-regulated ECF transporter]	Amino acids	Proteobacteria	E46
function=[Monoamine/putrescine oxidase (EC 1.4.3.10)]	Amino acids	Proteobacteria	E46
function=[N-acetyl-lysine aminotransferase (EC 2.6.1.-)]	Amino acids	Proteobacteria	E46
function=[Phenylalanine hydroxylase transcriptional activator PhhR]	Amino acids	Proteobacteria	E46
function=[Predicted regulator PutR for proline utilizatio]	Amino acids	Proteobacteria	E46
function=[Succinylglutamate desuccinylase (EC 3.5.1.96)]	Amino acids	Proteobacteria	E46
function=[Transcriptional repressor protein TyrR]	Amino acids	Proteobacteria	E46
function=[-bisphosphate phosphatase (EC 3.1.1.-)]	Amino acids	Proteobacteria	E47
function=[Anthranilate dioxygenase large subunit]	Amino acids	Proteobacteria	E47
function=[Delta 1-piperideine-2-carboxylate reductase (EC 1.5.1.21)]	Amino acids	Proteobacteria	E47
function=[Probable two-component senso]	Amino acids	Proteobacteria	E47
function=[Acting phosphoribosylanthranilate isomerase (EC 5.3.1.24)]	Amino acids	Thaumarchaeota	E7
function=[Prephenate dehydrogenase (EC 1.3.1.12)]	Amino acids	Verrucomicrobia	E44
function=[Pca regulon regulatory protein PcaR]	Aromatics	Actinobacteria	E2
function=[Putative 3-alpha-hydroxysteroid dehydrogenase/carbonyl reductase oxidoreductase protein (EC 1.1.1.50)]	Aromatics	Actinobacteria	E7
function=[Dihydrodiol dehydrogenase (EC 1.3.1.56)]	Aromatics	Actinobacteria	E46
function=[Biphenyl dioxygenase alpha subunit (EC 1.14.12.18)]	Aromatics	Actinobacteria	E47
function=[Succinyl-CoA:(R)-benzylsuccinate CoA-transferase subunit BbsF (EC 2.8.3.15)]	Aromatics	Actinobacteria	E47
function=[Phenylitaconyl-CoA hydratase (EC 4.2.1.-)]	Aromatics	Firmicutes	E7
function=[Hydroxyaromatic non-oxidative decarboxylase protein C (EC 4.1.1.-)]	Aromatics	Firmicutes	E47
function=[benABC operon transcriptional activator BenR]	Aromatics	Proteobacteria	E2
function=[enoyl-CoA hydratas]	Aromatics	Proteobacteria	E2
function=[Homoprotocatechuate degradative operon repressor]	Aromatics	Proteobacteria	E2
function=[-dioxygenase]	Aromatics	Proteobacteria	E7
function=[Acetate permease ActP (cation/acetate symporter) PaaL]	Aromatics	Proteobacteria	E7
function=[p-cumate dioxygenase large subunit (CmtAb)]	Aromatics	Proteobacteria	E7
function=[p-cumic aldehyde dehydrogenase (CymC) [EC:1.2.1.3]]	Aromatics	Proteobacteria	E7
function=[P-cymene monooxygenas]	Aromatics	Proteobacteria	E7
function=[Periplasmic aromatic aldehyde oxidoreductas]	Aromatics	Proteobacteria	E7
function=[3-oxoadipate enol-lactone hydrolase]	Aromatics	Proteobacteria	E44
function=[Acetophenone carboxylase subunit Apc1]	Aromatics	Proteobacteria	E44
function=[naphthalene dioxygenase ferredoxin]	Aromatics	Proteobacteria	E44
function=[Benzoyl-CoA oxygenase component A]	Aromatics	Proteobacteria	E46
function=[Biphenyl dioxygenase beta subunit (EC 1.14.12.18)]	Aromatics	Proteobacteria	E46
function=[Fumarylacetoacetate (FAA) hydrolase (EC 3.7.1.5)]	Aromatics	Proteobacteria	E46
function=[Intradiol ring-cleavage dioxygenase (EC 1.13.11.1)]	Aromatics	Proteobacteria	E46
function=[p-cumic alcohol dehydrogenase (CymB)]	Aromatics	Proteobacteria	E46
function=[Putative dioxygenas]	Aromatics	Proteobacteria	E46
function=[2-[hydroxy(phenyl)methyl]-succinyl-CoA dehydrogenase alpha subunit (EC 1.1.1.35)]	Aromatics	Proteobacteria	E47
function=[4-cresol dehydrogenase [hydroxylating] flavoprotein subunit (EC 1.17.99.1)]	Aromatics	Proteobacteria	E47
function=[Cyclohex-1-ene-1-carboxyl-CoA hydratase (EC 4.2.1.17)]	Aromatics	Proteobacteria	E47
function=[FIG094199: Fumarylacetoacetate hydrolase]	Aromatics	Proteobacteria	E47
function=[Protein involved in meta-pathway of phenol degradation]	Aromatics	Proteobacteria	E47
function=[Transcriptional regulator for ferulate or vanillate catabolism]	Aromatics	Proteobacteria	E47
function=[Pectin degradation protein KdgF]	Carbohydrates	Acidobacteria	E2
function=[Cob(III)alamin reductase]	Carbohydrates	Acidobacteria	E7
function=[Isocitrate dehydrogenase [NAD] subunit]	Carbohydrates	Acidobacteria	E7
function=[Alternative L-arabinose isomerase (EC 5.3.1.4)]	Carbohydrates	Acidobacteria	E46
function=[Glucosamine-link cellobiase (EC 3.2.1.21)]	Carbohydrates	Acidobacteria	E47
function=[Hypothetical protein TM0950]	Carbohydrates	Acidobacteria	E47
function=[5-keto-2-deoxy-D-gluconate-6 phosphate aldolase [form 2] (EC 4.1.2.29)]	Carbohydrates	Actinobacteria	E2
function=[L-arabinose transport system permease protein (TC 3.A.1.2.2)]	Carbohydrates	Actinobacteria	E2
function=[Xylose-responsive transcription regulato]	Carbohydrates	Actinobacteria	E2
function=[Alcohol dehydrogenase (EC 1.1.1.1)	Carbohydrates	Actinobacteria	E7
function=[Gluconate transporter family protein]	Carbohydrates	Actinobacteria	E7
function=[Predicted N-acetyl-glucosamine kinase]	Carbohydrates	Actinobacteria	E7
function=[Lactate-responsive regulator LldR in Actinobacteri]	Carbohydrates	Actinobacteria	E44
function=[Opc]	Carbohydrates	Actinobacteria	E44
function=[ermease component]	Carbohydrates	Actinobacteria	E46
function=[Isocitrate dehydrogenase 3 subunit alph]	Carbohydrates	Actinobacteria	E46
function=[L-rhamnonate dehydratase (EC 4.2.1.90)]	Carbohydrates	Actinobacteria	E46
function=[N-acetylglucosamine kinase of eukaryotic type (EC 2.7.1.59)]	Carbohydrates	Actinobacteria	E46
function=[Putative 2-keto-3-deoxygluconate kinase (EC 2.7.1.45)]	Carbohydrates	Actinobacteria	E46
function=[Transcriptional repressor of the fructose opero]	Carbohydrates	Actinobacteria	E46
function=[Beta-mannosidase (EC 3.2.1.25)]	Carbohydrates	Actinobacteria	E47
function=[Aldehyde dehydrogenas]	Carbohydrates	Bacteria	E44
function=[Predicted glycosylas]	Carbohydrates	Bacteria	E44
function=[Beta-galactosidase (EC 3.2.1.23]	Carbohydrates	Bacteria	E46
function=[Alpha-amylase (Neopullulanase) SusA (EC 3.2.1.135)]	Carbohydrates	Bacteroidetes	E2
function=[Alpha-N-acetylglucosaminidase (EC 3.2.1.50)]	Carbohydrates	Bacteroidetes	E2
function=[N-acetyl glucosamine transporte]	Carbohydrates	Bacteroidetes	E2
function=[Uncharacterized protein Yph]	Carbohydrates	Bacteroidetes	E44
function=[Alpha-glucosidas]	Carbohydrates	Bacteroidetes	E46
function=[L-arabinose isomerase (EC 5.3.1.4)]	Carbohydrates	Bacteroidetes	E46
function=[Unknown pentose isomerase TM0951]	Carbohydrates	Bacteroidetes	E47
function=[Methylcobalamin:coenzyme M methyltransferas]	Carbohydrates	Chloroflexi	E7
function=[Dimethylamine permease]	Carbohydrates	Euryarchaeota	E7
function=[Glucose dehydrogenase (EC 1.1.99.10]	Carbohydrates	Euryarchaeota	E7
function=[Formylmethanofuran dehydrogenase (tungsten) subunit C (EC 1.2.99.5)]	Carbohydrates	Euryarchaeota	E47
function=[Phosphoglycolate phosphatas]	Carbohydrates	Euryarchaeota	E47
function=[Altronate oxidoreductase (EC 1.1.1.58)]	Carbohydrates	Firmicutes	E2
function=[Methylthiol:coenzyme M methyltransferase]	Carbohydrates	Firmicutes	E2
function=[Phosphoglyceromutase]	Carbohydrates	Firmicutes	E2
function=[Predicted glycosylase TM1225]	Carbohydrates	Firmicutes	E2
function=[Trimethylamine methyltransferase corrinoid protein]	Carbohydrates	Firmicutes	E2
function=[annose-specific IIB component (EC 2.7.1.69)]	Carbohydrates	Firmicutes	E7
function=[Acetolactate synthas]	Carbohydrates	Firmicutes	E44
function=[D-allose ABC transporte]	Carbohydrates	Firmicutes	E44
function=[Polygalacturonase (EC 3.2.1.15)]	Carbohydrates	Firmicutes	E44
function=[Transcriptional regulator Kdg]	Carbohydrates	Firmicutes	E44
function=[Alpha-xylosidase (EC 3.2.1.-)]	Carbohydrates	Firmicutes	E46
function=[Arabinose-proton symporter]	Carbohydrates	Firmicutes	E46
function=[Hypothetical zinc-type alcohol dehydrogenase-like protein YphC]	Carbohydrates	Firmicutes	E46
function=[Oligogalacturonate lyase (EC 4.2.2.6)]	Carbohydrates	Firmicutes	E46
function=[4-deoxy-L-threo-5-hexosulose-uronate ketol-isomerase (EC 5.3.1.17)]	Carbohydrates	Firmicutes	E47
function=[Aconitate hydratase large subunit (EC 4.2.1.3)]	Carbohydrates	Firmicutes	E47
function=[Cytoplasmic alpha-amylase (EC 3.2.1.1)]	Carbohydrates	Firmicutes	E47
function=[Ethanolamine utilization protein EutJ]	Carbohydrates	Firmicutes	E47
function=[Isocitrate dehydrogenase [NAD] subunit I]	Carbohydrates	Firmicutes	E47
function=[L-fucose isomerase (EC 5.3.1.25)]	Carbohydrates	Firmicutes	E47
function=[L-fuculokinase (EC 2.7.1.51)]	Carbohydrates	Firmicutes	E47
function=[Outer surface protein of unknown functio]	Carbohydrates	Firmicutes	E47
function=[3-keto-L-gulonate 6-phosphate decarboxylase]	Carbohydrates	Proteobacteria	E2
function=[Acetoacetyl-CoA reductase (EC 1.1.1.36) of ethylmalonyl-CoA pathway]	Carbohydrates	Proteobacteria	E2
function=[Chitodextrinase precursor (EC 3.2.1.14)]	Carbohydrates	Proteobacteria	E2
function=[D-mannose isomerase (EC 5.3.1.7)]	Carbohydrates	Proteobacteria	E2
function=[Methylglyoxal synthase (EC 4.2.3.3)]	Carbohydrates	Proteobacteria	E2
function=[Multiple polyol-specific dehydrogenase (EC 1.1.1.-)]	Carbohydrates	Proteobacteria	E2
function=[N-acetylglucosamine regulated methyl-accepting chemotaxis protein]	Carbohydrates	Proteobacteria	E2
function=[NTD biosynthesis operon putative oxidoreductase NtdC (EC 1.-.-.-)]	Carbohydrates	Proteobacteria	E2
function=[Predicted mannitol permease]	Carbohydrates	Proteobacteria	E2
function=[Ribose/xylose/arabinose/galactoside ABC-type transport system]	Carbohydrates	Proteobacteria	E2
function=[Sorbitol operon transcription regulator]	Carbohydrates	Proteobacteria	E2
function=[3-hydroxybutyrate dehydrogenase (EC 1.1.1.30)]	Carbohydrates	Proteobacteria	E7
function=[ABC transport syste]	Carbohydrates	Proteobacteria	E7
function=[DP-glucuronic acid decarboxylase (EC 4.1.1.-)]	Carbohydrates	Proteobacteria	E7
function=[Glycolate utilization operon transcriptional activator GlcC]	Carbohydrates	Proteobacteria	E7
function=[hage lambda receptor protein)]	Carbohydrates	Proteobacteria	E7
function=[N-acetylglucosamine-regulated TonB-dependent outer membrane receptor]	Carbohydrates	Proteobacteria	E7
function=[Phosphoribulokinase (EC 2.7.1.19) homolo]	Carbohydrates	Proteobacteria	E7
function=[Predicted galactosamine-6-phosphate isomerase (EC 5.3.1.-)]	Carbohydrates	Proteobacteria	E7
function=[Predicted Lactate-responsive regulato]	Carbohydrates	Proteobacteria	E7
function=[Putative deoxyribonuclease YjjV]	Carbohydrates	Proteobacteria	E7
function=[Putative oxidoreductase YcjS (EC 1.-.-.-]	Carbohydrates	Proteobacteria	E7
function=[Rhamnogalacturonides degradation protein RhiN]	Carbohydrates	Proteobacteria	E7
function=[RuBisCO operon transcriptional regulator CbbR]	Carbohydrates	Proteobacteria	E7
function=[Tagatose-6-phosphate kinase AgaZ (EC 2.7.1.144)]	Carbohydrates	Proteobacteria	E7
function=[TonB-dependent receptor possibly related to N-acetylgalactosamine utilization]	Carbohydrates	Proteobacteria	E7
function=[-alpha-L-arabinosidase (EC 3.2.1.99)]	Carbohydrates	Proteobacteria	E44
function=[5-dehydro-4-deoxyglucarate dehydratase (EC 4.2.1.41)]	Carbohydrates	Proteobacteria	E44
function=[aaZ]	Carbohydrates	Proteobacteria	E44
function=[Chitin binding protein]	Carbohydrates	Proteobacteria	E44
function=[Chitin catabolic cascade sensor histidine kinase ChiS]	Carbohydrates	Proteobacteria	E44
function=[Chitobiose phosphorylase (EC 2.4.1.-)]	Carbohydrates	Proteobacteria	E44
function=[Cob(II)alamin reductase]	Carbohydrates	Proteobacteria	E44
function=[Integral membrane sensor signal transduction histidine kinase (EC 2.7.13.3]	Carbohydrates	Proteobacteria	E44
function=[NADPH-dependent methylglyoxal reductase (D-lactaldehyde dehydrogenase)]	Carbohydrates	Proteobacteria	E44
function=[Predicted gluconate TRAP family transporte]	Carbohydrates	Proteobacteria	E44
function=[-bisphosphate aldolase AgaY (EC 4.1.2.-)]	Carbohydrates	Proteobacteria	E46
function=[-dienoate hydratase]	Carbohydrates	Proteobacteria	E46
function=[Biotin carboxylase of Propionyl-CoA carboxylase (EC 6.3.4.14)]	Carbohydrates	Proteobacteria	E46
function=[D-xylose-specific 1-epimerase (mutarotase)]	Carbohydrates	Proteobacteria	E46
function=[Ethanolamine two-component response regulator]	Carbohydrates	Proteobacteria	E46
function=[hodanese (EC 2.8.1.1)]	Carbohydrates	Proteobacteria	E46
function=[Maltose regulon modulator]	Carbohydrates	Proteobacteria	E46
function=[Transcriptional regulator of maltose utilizatio]	Carbohydrates	Proteobacteria	E46
function=[Xylose oligosaccharides ABC transporte]	Carbohydrates	Proteobacteria	E46
function=[D-galactarate permease]	Carbohydrates	Proteobacteria	E47
function=[Ethanolamine utilization polyhedral-body-like protein EutL]	Carbohydrates	Proteobacteria	E47
function=[Fructose-bisphosphate aldolas]	Carbohydrates	Proteobacteria	E47
function=[Galactose permease]	Carbohydrates	Proteobacteria	E47
function=[Glucose ABC transporte]	Carbohydrates	Proteobacteria	E47
function=[Hypothetical oxidoreductase YgcW (EC 1.-.-.-)]	Carbohydrates	Proteobacteria	E47
function=[Lactose and galactose permeas]	Carbohydrates	Proteobacteria	E47
function=[Methane monooxygenase component C (EC 1.14.13.25)]	Carbohydrates	Proteobacteria	E47
function=[Na+/H+-dicarboxylate symporters]	Carbohydrates	Proteobacteria	E47
function=[Predicted beta-glucoside specific TonB-dependent outer membrane receptor]	Carbohydrates	Proteobacteria	E47
function=[Predicted L-arabinose ABC transport syste]	Carbohydrates	Proteobacteria	E47
function=[Predicted sucrose-specific TonB-dependent receptor]	Carbohydrates	Proteobacteria	E47
function=[Propanediol diffusion facilitator]	Carbohydrates	Proteobacteria	E47
function=[putative carboxysome peptide B]	Carbohydrates	Proteobacteria	E47
function=[Retinal dehydrogenase 2 (EC 1.2.1.36) (Aldehyde dehydrogenase family 1 member A2)]	Carbohydrates	Proteobacteria	E47
function=[Sensory subunit of low CO2-induced protein comple]	Carbohydrates	Proteobacteria	E47
function=[putative sodium-dependent bicarbonate transporter]	Carbohydrates	Thaumarchaeota	E7
function=[Predicted cellobiose ABC transport syste]	Carbohydrates	Thaumarchaeota	E46
function=[NTD biosynthesis operon protein NtdA]	Carbohydrates	Thaumarchaeota	E47
function=[N-acetylhexosamine 1-kinase]	Carbohydrates	Verrucomicrobia	E46
function=[Nitrite reductase probable electron transfer 4Fe-S subunit (EC 1.7.1.4)]	Nitrogen	Acidobacteria	E7
function=[Respiratory nitrate reductase delta chain (EC 1.7.99.4)]	Nitrogen	Actinobacteria	E2
function=[Nitrous oxide reductase maturation protein NosD]	Nitrogen	Bacteroidetes	E2
function=[Nitric oxide reductase activation protein NorD]	Nitrogen	Chloroflexi	E44
function=[Nitrite transporter NirC]	Nitrogen	Firmicutes	E47
function=[Ferredoxin--nitrite reductase (EC 1.7.7.1)]	Nitrogen	Nitrospirae	E46
function=[Nitrite transporter from formate/nitrite family]	Nitrogen	Proteobacteria	E2
function=[Ferredoxin-type protein NapF (periplasmic nitrate reductase)]	Nitrogen	Proteobacteria	E7
function=[NADH oxidoreductase hcr (EC 1.-.-.-)]	Nitrogen	Proteobacteria	E7
function=[Nitric oxide -responding transcriptional regulator NnrR (Crp/Fnr family)]	Nitrogen	Proteobacteria	E44
function=[Cytochrome c55X precursor NirC]	Nitrogen	Proteobacteria	E46
function=[Nitrate/nitrite sensor protein (EC 2.7.3.-)]	Nitrogen	Proteobacteria	E46
function=[Ribosome protection-type tetracycline resistance related proteins]	Protein	Actinobacteria	E2
function=[Aspartyl-tRNA synthetase (EC 6.1.1.12]	Protein	Actinobacteria	E46
function=[Oxytetracycline resistance protein OtrA]	Protein	Actinobacteria	E47
function=[Alanyl-tRNA synthetase (EC 6.1.1.7]	Protein	Bacteria	E2
function=[LSU ribosomal protein L16p (L10e]	Protein	Bacteria	E2
function=[proteasome regulatory subunit Rpn3]	Protein	Bacteria	E2
function=[SSU ribosomal protein S4p (S9e]	Protein	Bacteria	E2
function=[Glycine decarboxylase L-protein 2 (EC 1.8.1.4]	Protein	Bacteria	E7
function=[LSU ribosomal protein L34e]	Protein	Bacteria	E7
function=[LSU ribosomal protein MRPL3]	Protein	Bacteria	E7
function=[proteasome regulatory subunit Rpn6]	Protein	Bacteria	E7
function=[proteasome subunit alpha6 (EC 3.4.25.1)]	Protein	Bacteria	E7
function=[Glutamyl-tRNA synthetase (EC 6.1.1.17]	Protein	Bacteria	E44
function=[LSU ribosomal protein L13e]	Protein	Bacteria	E44
function=[proteasome regulatory subunit Rpt6]	Protein	Bacteria	E44
function=[proteasome subunit beta5 (EC 3.4.25.1)]	Protein	Bacteria	E44
function=[proteasome subunit beta7 (EC 3.4.25.1)]	Protein	Bacteria	E44
function=[SSU ribosomal protein S23m]	Protein	Bacteria	E44
function=[Allantoin permease]	Protein	Bacteria	E46
function=[LSU ribosomal protein L7/L12 (L23e]	Protein	Bacteria	E46
function=[proteasome regulatory subunit Rpn1]	Protein	Bacteria	E46
function=[proteasome regulatory subunit Rpn8]	Protein	Bacteria	E46
function=[proteasome regulatory subunit Rpt3]	Protein	Bacteria	E46
function=[proteasome regulatory subunit Rpt4]	Protein	Bacteria	E46
function=[SSU ribosomal protein S2p (SAe]	Protein	Bacteria	E46
function=[Translational activator for COX1 mRN]	Protein	Bacteria	E46
function=[Translational activator for COX3 mRN]	Protein	Bacteria	E46
function=[ferric uptake regulator]	Protein	Bacteria	E47
function=[proteasome regulatory subunit Rpn2]	Protein	Bacteria	E47
function=[acillus subtilis YjbO type]	Protein	Chloroflexi	E47
function=[LSU ribosomal protein L14e]	Protein	Euryarchaeota	E2
function=[proteasome regulatory subunit Rpt2]	Protein	Euryarchaeota	E2
function=[LonB like ATP-ase no protease domain]	Protein	Euryarchaeota	E44
function=[LSU ribosomal protein L37e]	Protein	Euryarchaeota	E47
function=[Collagen alpha 1(I) chain precursor]	Protein	Firmicutes	E2
function=[Microbial collagenase (EC 3.4.24.3)]	Protein	Firmicutes	E2
function=[Thiol:disulfide oxidoreductase associated with MetSO reductase]	Protein	Firmicutes	E2
function=[Valyl-tRNA synthetase (EC 6.1.1.9]	Protein	Firmicutes	E2
function=[Glycine reductase component B alpha subunit (EC 1.21.4.2)]	Protein	Firmicutes	E7
function=[Glycine/sarcosine/betaine reductase protein A]	Protein	Firmicutes	E7
function=[Tetracycline resistance protein TetP]	Protein	Firmicutes	E7
function=[Aminopeptidase S (Le]	Protein	Firmicutes	E46
function=[Alanyl-tRNA synthetase family protein]	Protein	Firmicutes	E47
function=[Bacillolysi]	Protein	Firmicutes	E47
function=[Glutamyl-tRNA(Gln) amidotransferase subunit A (EC 6.3.5.7)]	Protein	Planctomycetes	E7
function=[[NiFe] hydrogenase nickel incorporation-associated protein HypB]	Protein	Proteobacteria	E2
function=[ClpXP protease specificity-enhancing factor]	Protein	Proteobacteria	E2
function=[Glutamate carboxypeptidase (EC 3.4.17.11)]	Protein	Proteobacteria	E7
function=[Threonyl-tRNA synthetase-related protein]	Protein	Proteobacteria	E7
function=[Translation elongation factor]	Protein	Proteobacteria	E7
function=[Archaeal seryl-tRNA synthetase-related sequence]	Protein	Proteobacteria	E46
function=[Cysteinyl-tRNA synthetase paralog 2]	Protein	Proteobacteria	E46
function=[Leucyl-tRNA synthetase (EC 6.1.1.4]	Protein	Proteobacteria	E46
function=[Tryptophanyl-tRNA synthetase (EC 6.1.1.2]	Protein	Proteobacteria	E46
function=[[NiFe] hydrogenase metallocenter assembly protein HypC]	Protein	Proteobacteria	E47
function=[Similar to ribosomal large subunit pseudouridine synthase A]	Protein	Proteobacteria	E47
function=[Threonyl-tRNA synthetase fragment]	Protein	Proteobacteria	E47
function=[Translation elongation factor P-related protein]	Protein	Proteobacteria	E47
function=[Alanyl-tRNA synthetas]	Protein	Thaumarchaeota	E44
function=[Fumarate reductase subunit C]	Respiration	Actinobacteria	E7
function=[Uncharacterized HTH-type transcriptional regulator MJ0272]	Respiration	Actinobacteria	E7
function=[Fumarate reductase subunit D]	Respiration	Actinobacteria	E47
function=[Energy-conserving hydrogenase (ferredoxin]	Respiration	Bacteria	E2
function=[NADH dehydrogenase I subunit]	Respiration	Bacteria	E2
function=[NAD(P)H-quinone oxidoreductase chain I (EC 1.6.5.2)]	Respiration	Bacteria	E46
function=[Coenzyme F(420)H(2) dehydrogenase (methanophenazine) subunit FpoB]	Respiration	Bacteroidetes	E46
function=[CO dehydrogenase/acetyl-CoA synthas]	Respiration	Chloroflexi	E2
function=[Energy conserving hydrogenase Ehb protein I]	Respiration	Euryarchaeota	E2
function=[Hydrogenase-4 component B (EC 1.-.-.-)]	Respiration	Euryarchaeota	E2
function=[Methyl coenzyme M reductase system component A2]	Respiration	Euryarchaeota	E7
function=[Coenzyme F(420)H(2) dehydrogenase (methanophenazine) subunit FpoD]	Respiration	Euryarchaeota	E47
function=[NADH dehydrogenas]	Respiration	Firmicutes	E2
function=[quinol oxidase polypeptide III QoxC (EC:1.9.3.-)]	Respiration	Firmicutes	E2
function=[Glutaconyl-CoA decarboxylase beta chain (EC 4.1.1.70)]	Respiration	Firmicutes	E7
function=[Menaquinone-cytochrome C oxidoreductas]	Respiration	Firmicutes	E44
function=[quinol oxidase polypeptide II QoxA (EC:1.9.3.-)]	Respiration	Firmicutes	E44
function=[NADH dehydrogenase subunit 1]	Respiration	Nitrospirae	E46
function=[Coenzyme F420-reducing hydrogenas]	Respiration	Proteobacteria	E2
function=[Tetrachloroethene reductive dehalogenase PceA (EC 1.97.1.8)]	Respiration	Proteobacteria	E2
function=[FixO3 cytochrome-c oxidase subunit]	Respiration	Proteobacteria	E7
function=[outer membrane protei]	Respiration	Proteobacteria	E7
function=[Formate dehydrogenase N beta subunit (EC 1.2.1.2)]	Respiration	Proteobacteria	E44
function=[Probable cytochrome c2]	Respiration	Proteobacteria	E44
function=[Uncharacterized protein MJ0296]	Respiration	Proteobacteria	E44
function=[Copper metallochaperon]	Respiration	Proteobacteria	E46
function=[Cytochrome c-type biogenesis protein Ccs1/ResB]	Respiration	Proteobacteria	E46
function=[hydrogenase/sulfur reductas]	Respiration	Proteobacteria	E46
function=[NADPH:quinone reductase (Quinone oxidoreductase) (EC 1.6.5.5)]	Respiration	Proteobacteria	E46
function=[Succinate dehydrogenase cytochrome b560 subunit]	Respiration	Proteobacteria	E46
function=[Tetrathionate reductase two-component response regulator]	Respiration	Proteobacteria	E46
function=[Coenzyme F420-dependent oxidoreductase]	Respiration	Proteobacteria	E47
function=[Cytochrome c oxidase (B(O/a)3-type) chain II (EC 1.9.3.1)]	Respiration	Proteobacteria	E47
function=[cytochrome-c3 hydrogenase delta chain]	Respiration	Proteobacteria	E47
function=[NAD-reducing hydrogenase subunit HoxH (EC 1.12.1.2)]	Respiration	Proteobacteria	E47
function=[NADH-ubiquinone oxidoreductase chain B (EC 1.6.5.3) homolog]	Respiration	Proteobacteria	E47
function=[Octaheme tetrathionate reductase]	Respiration	Proteobacteria	E47
function=[Quinol oxidase (SoxABC]	Respiration	Verrucomicrobia	E7
function=[quinol oxidase polypeptide I QoxB (EC:1.9.3.-)]	Respiration	Verrucomicrobia	E46
function=[superoxide dismutase [Fe-Zn] (EC 1.15.1.1)]	Stress	Actinobacteria	E7
function=[RNA polymerase sigma-70 factor]	Stress	Actinobacteria	E44
function=[Organic hydroperoxide resistance protein]	Stress	Actinobacteria	E47
function=[Peroxide stress regulator]	Stress	Bacteria	E47
function=[L-cysteine:1D-myo-inosityl 2-amino-2-deoxy-alpha-D-glucopyranoside ligase MshC]	Stress	Chloroflexi	E2
function=[Glyceraldehyde-3-phosphate dehydrogenase (EC 1.2.1.12) (GAPDH)]	Stress	Chloroflexi	E44
function=[Glucans biosynthesis protein C (EC 2.1.-.-)]	Stress	Firmicutes	E7
function=[Choline binding protein A]	Stress	Firmicutes	E44
function=[CoA-disulfide reductase (EC 1.8.1.14)]	Stress	Proteobacteria	E2
function=[Sarcosine oxidase gamma subunit (EC 1.5.3.1)]	Stress	Proteobacteria	E2
function=[Ectoine hydroxylase (EC 1.17.-.-)]	Stress	Proteobacteria	E7
function=[Oxidoreductase YihU]	Stress	Proteobacteria	E44
function=[Putative regulatory protein associated with the ectoine operon]	Stress	Proteobacteria	E44
function=[Blr3520 protein homolo]	Stress	Proteobacteria	E46
function=[Sulfur oxidation protein SoxZ]	Stress	Proteobacteria	E46
function=[Glutaredoxin 3]	Stress	Proteobacteria	E47
function=[Glutathionylspermidine amidohydrolase (EC 3.5.1.78)]	Stress	Proteobacteria	E47
function=[OpgC protein]	Stress	Proteobacteria	E47
function=[Phage shock protein C]	Stress	Proteobacteria	E47
function=[Universal stress protein family COG0589]	Stress	Proteobacteria	E47
function=[Alpha-galactosidase precursor (EC 3.2.1.22)]	Sulfur	Acidobacteria	E7
function=[Outer membrane protein H precursor]	Sulfur	Acidobacteria	E46
function=[Alkylhydroperoxidase protein D]	Sulfur	Actinobacteria	E47
function=[Sulfur oxidation protein SoxX]	Sulfur	Bacteria	E2
function=[Polysulfide reductas]	Sulfur	Bacteria	E7
function=[Conserved hypothetical protein probably involved in assimilatory sulfate reduction]	Sulfur	Bacteroidetes	E2
function=[issimilatory-type gamma subunit (EC 1.8.99.3)]	Sulfur	Proteobacteria	E2
function=[Sulfate transport system permease protein CysT]	Sulfur	Proteobacteria	E2
function=[Ferredoxin--NADP(+) reductase (EC 1.18.1.2)]	Sulfur	Proteobacteria	E7
function=[Sulfate-binding protein Sbp]	Sulfur	Proteobacteria	E7
function=[transcriptional regulator SoxR]	Sulfur	Proteobacteria	E44
function=[Osmoprotectant ABC transporter ATP-binding subunit YehX]	Sulfur	Proteobacteria	E46
function=[Universal stress protein E]	Sulfur	Proteobacteria	E46
function=[Universal stress protein family 1]	Sulfur	Proteobacteria	E46
function=[Lipocalin-related protein and Bos/Can/Equ allergen]	Sulfur	Proteobacteria	E47
function=[Prolyl-tRNA synthetase (EC 6.1.1.15]	Unclassified	Bacteria	E2
function=[Gamma-aminobutyrate:pyruvate aminotransferase (EC 2.6.1.-)]	Unclassified	Bacteria	E44
function=[Isoamylase-type starch debranching enzyme (3.2.1.-)]	Unclassified	Bacteria	E44
function=[diphtheria toxin repressor]	Unclassified	Bacteria	E46
function=[Frataxin homolog Cya]	Unclassified	Bacteria	E46
function=[Lysyl-tRNA synthetase (class II) (EC 6.1.1.6]	Unclassified	Bacteria	E46
function=[Lipoamide acyltransferase component of branched-chain alpha-keto acid dehydrogenase complex (EC 2.3.1.-)]	Unclassified	Bacteria	E47
function=[Eukaryotic translation initiation factor 3 RNA-binding subunit]	Unclassified	Unclassified	E44
function=[Eukaryotic translation initiation factor 3 30 kDa subunit]	Unclassified	Unclassified	E46

## Sheet: Table V
Supplementary Table V. Genes affiliated with Proteobacterial classes and genus throughout metagenomes.
Proteobacteria Class	Genus	Function	Sample
Alphaproteobacteria	Caulobacterales	Sulfate adenylyltransferase	E2
Alphaproteobacteria	Caulobacterales	Sulfite oxidase	E2
Alphaproteobacteria	Caulobacterales	Sulfite reductase [NADPH] hemoprotein beta-component	E2
Alphaproteobacteria	Magnetococcales	Sulfite oxidase	E2
Alphaproteobacteria	Parvularculales	Sulfite reductase [NADPH] hemoprotein beta-component	E2
Alphaproteobacteria	Rhizobiales	Methanol dehydrogenase	E2
Alphaproteobacteria	Rhizobiales	Copper-containing nitrite reductase	E2
Alphaproteobacteria	Rhizobiales	Nitrate reductase cytochrome c550-type subunit]	E2
Alphaproteobacteria	Rhizobiales	Respiratory nitrate reductase	E2
Alphaproteobacteria	Rhizobiales	Sulfate adenylyltransferase	E2
Alphaproteobacteria	Rhizobiales	Sulfite dehydrogenase cytochrome subunit SoxD	E2
Alphaproteobacteria	Rhizobiales	Sulfite oxidase	E2
Alphaproteobacteria	Rhizobiales	Sulfite reductase [NADPH] hemoprotein beta-component	E2
Alphaproteobacteria	Rhizobiales	Sulfite reduction-associated complex DsrK	E2
Alphaproteobacteria	Rhizobiales	Sulfite reduction-associated complex DsrP	E2
Alphaproteobacteria	Rhizobiales	sulfonate monooxygenase	E2
Alphaproteobacteria	Rhizobiales	Sulfur oxidation protein SoxB	E2
Alphaproteobacteria	Rhizobiales	sulfur oxidation protein SoxC	E2
Alphaproteobacteria	Rhizobiales	Sulfur oxidation protein SoxY	E2
Alphaproteobacteria	Rhodobacterales	Methane monooxygenase component A	E2
Alphaproteobacteria	Rhodobacterales	Assimilatory nitrate reductase large subunit	E2
Alphaproteobacteria	Rhodobacterales	Copper-containing nitrite reductase	E2
Alphaproteobacteria	Rhodobacterales	Ferredoxin-type protein NapF (periplasmic nitrate reductase)	E2
Alphaproteobacteria	Rhodobacterales	Polyferredoxin NapH (periplasmic nitrate reductase)	E2
Alphaproteobacteria	Rhodobacterales	Respiratory nitrate reductase	E2
Alphaproteobacteria	Rhodobacterales	Sulfate adenylyltransferase	E2
Alphaproteobacteria	Rhodobacterales	Sulfite oxidase	E2
Alphaproteobacteria	Rhodobacterales	Sulfite reductase [NADPH] hemoprotein beta-component	E2
Alphaproteobacteria	Rhodobacterales	Sulfur oxidation protein SoxB	E2
Alphaproteobacteria	Rhodobacterales	sulfur oxidation protein SoxC	E2
Alphaproteobacteria	Rhodospirillales	Methane monooxygenase component A	E2
Alphaproteobacteria	Rhodospirillales	Methanol dehydrogenase	E2
Alphaproteobacteria	Rhodospirillales	Respiratory nitrate reductase	E2
Alphaproteobacteria	Rhodospirillales	Sulfate adenylyltransferase	E2
Alphaproteobacteria	Rhodospirillales	Sulfite oxidase	E2
Alphaproteobacteria	Rhodospirillales	Sulfite reductase [NADPH] hemoprotein beta-component	E2
Alphaproteobacteria	Rhodospirillales	sulfur oxidation protein SoxC	E2
Alphaproteobacteria	Rickettsiales	Sulfate adenylyltransferase	E2
Alphaproteobacteria	Sphingomonadales	Alkanesulfonate monooxygenase	E2
Alphaproteobacteria	Sphingomonadales	Sulfate adenylyltransferase	E2
Alphaproteobacteria	Caulobacterales	Sulfate adenylyltransferase	E44
Alphaproteobacteria	Caulobacterales	Sulfite oxidase	E44
Alphaproteobacteria	Rhizobiales	Methanol dehydrogenase	E44
Alphaproteobacteria	Rhizobiales	naphthalene dioxygenase ferredoxin	E44
Alphaproteobacteria	Rhizobiales	Copper-containing nitrite reductase	E44
Alphaproteobacteria	Rhizobiales	Nitrate reductase cytochrome c550-type subunit]	E44
Alphaproteobacteria	Rhizobiales	Respiratory nitrate reductase	E44
Alphaproteobacteria	Rhizobiales	Sulfate adenylyltransferase	E44
Alphaproteobacteria	Rhizobiales	Sulfite oxidase	E44
Alphaproteobacteria	Rhizobiales	Sulfite reductase [NADPH] hemoprotein beta-component	E44
Alphaproteobacteria	Rhizobiales	sulfur oxidation protein SoxA	E44
Alphaproteobacteria	Rhizobiales	Sulfur oxidation protein SoxB	E44
Alphaproteobacteria	Rhizobiales	sulfur oxidation protein SoxC	E44
Alphaproteobacteria	Rhodobacterales	Methanol dehydrogenase	E44
Alphaproteobacteria	Rhodobacterales	Assimilatory nitrate reductase large subunit	E44
Alphaproteobacteria	Rhodobacterales	Copper-containing nitrite reductase	E44
Alphaproteobacteria	Rhodobacterales	Ferredoxin-type protein NapF (periplasmic nitrate reductase)	E44
Alphaproteobacteria	Rhodobacterales	Polyferredoxin NapH (periplasmic nitrate reductase)	E44
Alphaproteobacteria	Rhodobacterales	Respiratory nitrate reductase	E44
Alphaproteobacteria	Rhodobacterales	Sulfate adenylyltransferase	E44
Alphaproteobacteria	Rhodobacterales	Sulfite oxidase	E44
Alphaproteobacteria	Rhodobacterales	Sulfite reductase [NADPH] hemoprotein beta-component	E44
Alphaproteobacteria	Rhodobacterales	sulfur oxidation protein SoxA	E44
Alphaproteobacteria	Rhodobacterales	Sulfur oxidation protein SoxB	E44
Alphaproteobacteria	Rhodospirillales	Methanol dehydrogenase	E44
Alphaproteobacteria	Rhodospirillales	Sulfate adenylyltransferase	E44
Alphaproteobacteria	Rhodospirillales	Sulfite dehydrogenase cytochrome subunit SoxD	E44
Alphaproteobacteria	Rhodospirillales	Sulfite oxidase	E44
Alphaproteobacteria	Rhodospirillales	Sulfite reductase [NADPH] hemoprotein beta-component	E44
Alphaproteobacteria	Rhodospirillales	Sulfur oxidation protein SoxB	E44
Alphaproteobacteria	Sphingomonadales	Sulfate adenylyltransferase	E44
Alphaproteobacteria	Sphingomonadales	Sulfite reductase [NADPH] hemoprotein beta-component	E44
Alphaproteobacteria	Caulobacterales	Sulfate adenylyltransferase	E46
Alphaproteobacteria	Caulobacterales	Sulfite reductase [NADPH] hemoprotein beta-component	E46
Alphaproteobacteria	Magnetococcales	Sulfite oxidase	E46
Alphaproteobacteria	Magnetococcales	Sulfite reduction-associated complex DsrK	E46
Alphaproteobacteria	Parvularculales	Sulfate adenylyltransferase	E46
Alphaproteobacteria	Rhizobiales	Methane monooxygenase component A	E46
Alphaproteobacteria	Rhizobiales	Methanol dehydrogenase	E46
Alphaproteobacteria	Rhizobiales	Copper-containing nitrite reductase	E46
Alphaproteobacteria	Rhizobiales	Nitrate reductase cytochrome c550-type subunit]	E46
Alphaproteobacteria	Rhizobiales	Respiratory nitrate reductase	E46
Alphaproteobacteria	Rhizobiales	Alkanesulfonate monooxygenase	E46
Alphaproteobacteria	Rhizobiales	Sulfate adenylyltransferase	E46
Alphaproteobacteria	Rhizobiales	Sulfite dehydrogenase cytochrome subunit SoxD	E46
Alphaproteobacteria	Rhizobiales	Sulfite oxidase	E46
Alphaproteobacteria	Rhizobiales	Sulfite reductase [NADPH] hemoprotein beta-component	E46
Alphaproteobacteria	Rhizobiales	Sulfite reduction-associated complex DsrK	E46
Alphaproteobacteria	Rhizobiales	sulfonate monooxygenase	E46
Alphaproteobacteria	Rhizobiales	Sulfur oxidation protein SoxB	E46
Alphaproteobacteria	Rhizobiales	sulfur oxidation protein SoxC	E46
Alphaproteobacteria	Rhodobacterales	Methanol dehydrogenase	E46
Alphaproteobacteria	Rhodobacterales	Assimilatory nitrate reductase large subunit	E46
Alphaproteobacteria	Rhodobacterales	Copper-containing nitrite reductase	E46
Alphaproteobacteria	Rhodobacterales	Ferredoxin-type protein NapF (periplasmic nitrate reductase)	E46
Alphaproteobacteria	Rhodobacterales	Polyferredoxin NapH (periplasmic nitrate reductase)	E46
Alphaproteobacteria	Rhodobacterales	Respiratory nitrate reductase	E46
Alphaproteobacteria	Rhodobacterales	Sulfate adenylyltransferase	E46
Alphaproteobacteria	Rhodobacterales	Sulfite dehydrogenase cytochrome subunit SoxD	E46
Alphaproteobacteria	Rhodobacterales	Sulfite oxidase	E46
Alphaproteobacteria	Rhodobacterales	Sulfite reductase [NADPH] hemoprotein beta-component	E46
Alphaproteobacteria	Rhodobacterales	sulfonate monooxygenase	E46
Alphaproteobacteria	Rhodobacterales	sulfur oxidation protein SoxC	E46
Alphaproteobacteria	Rhodospirillales	Methane monooxygenase component A	E46
Alphaproteobacteria	Rhodospirillales	Methanol dehydrogenase	E46
Alphaproteobacteria	Rhodospirillales	Respiratory nitrate reductase	E46
Alphaproteobacteria	Rhodospirillales	Sulfate adenylyltransferase	E46
Alphaproteobacteria	Rhodospirillales	Sulfite oxidase	E46
Alphaproteobacteria	Rhodospirillales	Sulfite reductase [NADPH] hemoprotein beta-component	E46
Alphaproteobacteria	Rhodospirillales	Sulfite reductase alpha subunit	E46
Alphaproteobacteria	Rhodospirillales	Sulfite reductase beta subunit	E46
Alphaproteobacteria	Rhodospirillales	Sulfite reduction-associated complex DsrK	E46
Alphaproteobacteria	Rickettsiales	Sulfite oxidase	E46
Alphaproteobacteria	Sphingomonadales	Methanol dehydrogenase	E46
Alphaproteobacteria	Sphingomonadales	Sulfate adenylyltransferase	E46
Alphaproteobacteria	Sphingomonadales	Sulfite reductase [NADPH] hemoprotein beta-component	E46
Alphaproteobacteria	Sphingomonadales	sulfonate monooxygenase	E46
Alphaproteobacteria	Caulobacterales	Respiratory nitrate reductase	E47
Alphaproteobacteria	Caulobacterales	Sulfite reductase [NADPH] hemoprotein beta-component	E47
Alphaproteobacteria	Magnetococcales	Respiratory nitrate reductase	E47
Alphaproteobacteria	Magnetococcales	Sulfite oxidase	E47
Alphaproteobacteria	Rhizobiales	Methane monooxygenase component A	E47
Alphaproteobacteria	Rhizobiales	Methanol dehydrogenase	E47
Alphaproteobacteria	Rhizobiales	Copper-containing nitrite reductase	E47
Alphaproteobacteria	Rhizobiales	Nitrate reductase cytochrome c550-type subunit]	E47
Alphaproteobacteria	Rhizobiales	Respiratory nitrate reductase	E47
Alphaproteobacteria	Rhizobiales	Sulfate adenylyltransferase	E47
Alphaproteobacteria	Rhizobiales	Sulfite dehydrogenase cytochrome subunit SoxD	E47
Alphaproteobacteria	Rhizobiales	Sulfite oxidase	E47
Alphaproteobacteria	Rhizobiales	Sulfite reductase [NADPH] hemoprotein beta-component	E47
Alphaproteobacteria	Rhizobiales	Sulfite reduction-associated complex DsrK	E47
Alphaproteobacteria	Rhizobiales	Sulfur oxidation protein SoxB	E47
Alphaproteobacteria	Rhizobiales	sulfur oxidation protein SoxC	E47
Alphaproteobacteria	Rhodobacterales	Methanol dehydrogenase	E47
Alphaproteobacteria	Rhodobacterales	Assimilatory nitrate reductase large subunit	E47
Alphaproteobacteria	Rhodobacterales	Copper-containing nitrite reductase	E47
Alphaproteobacteria	Rhodobacterales	Ferredoxin-type protein NapF (periplasmic nitrate reductase)	E47
Alphaproteobacteria	Rhodobacterales	Polyferredoxin NapH (periplasmic nitrate reductase)	E47
Alphaproteobacteria	Rhodobacterales	Respiratory nitrate reductase	E47
Alphaproteobacteria	Rhodobacterales	Sulfate adenylyltransferase	E47
Alphaproteobacteria	Rhodobacterales	Sulfite oxidase	E47
Alphaproteobacteria	Rhodobacterales	Sulfite reductase [NADPH] hemoprotein beta-component	E47
Alphaproteobacteria	Rhodobacterales	Sulfur oxidation protein SoxB	E47
Alphaproteobacteria	Rhodobacterales	sulfur oxidation protein SoxC	E47
Alphaproteobacteria	Rhodospirillales	Methane monooxygenase component A	E47
Alphaproteobacteria	Rhodospirillales	Methanol dehydrogenase	E47
Alphaproteobacteria	Rhodospirillales	Respiratory nitrate reductase	E47
Alphaproteobacteria	Rhodospirillales	Sulfate adenylyltransferase	E47
Alphaproteobacteria	Rhodospirillales	Sulfite oxidase	E47
Alphaproteobacteria	Rhodospirillales	Sulfite reductase [NADPH] hemoprotein beta-component	E47
Alphaproteobacteria	Rhodospirillales	Sulfite reduction-associated complex DsrK	E47
Alphaproteobacteria	Rhodospirillales	sulfur oxidation protein SoxC	E47
Alphaproteobacteria	Rickettsiales	Sulfate adenylyltransferase	E47
Alphaproteobacteria	Sphingomonadales	Sulfate adenylyltransferase	E47
Alphaproteobacteria	Sphingomonadales	Sulfite reductase [NADPH] hemoprotein beta-component	E47
Alphaproteobacteria	Caulobacterales	Respiratory nitrate reductase	E7
Alphaproteobacteria	Caulobacterales	Sulfite reductase [NADPH] hemoprotein beta-component	E7
Alphaproteobacteria	Magnetococcales	Respiratory nitrate reductase	E7
Alphaproteobacteria	Magnetococcales	Sulfite reductase	E7
Alphaproteobacteria	Parvularculales	Sulfite reductase [NADPH] hemoprotein beta-component	E7
Alphaproteobacteria	Rhizobiales	Methane monooxygenase component A	E7
Alphaproteobacteria	Rhizobiales	Methanol dehydrogenase	E7
Alphaproteobacteria	Rhizobiales	Assimilatory nitrate reductase large subunit	E7
Alphaproteobacteria	Rhizobiales	Copper-containing nitrite reductase	E7
Alphaproteobacteria	Rhizobiales	Nitrate reductase cytochrome c550-type subunit]	E7
Alphaproteobacteria	Rhizobiales	Respiratory nitrate reductase	E7
Alphaproteobacteria	Rhizobiales	Sulfate adenylyltransferase	E7
Alphaproteobacteria	Rhizobiales	Sulfite dehydrogenase cytochrome subunit SoxD	E7
Alphaproteobacteria	Rhizobiales	Sulfite oxidase	E7
Alphaproteobacteria	Rhizobiales	Sulfite reductase [NADPH] hemoprotein beta-component	E7
Alphaproteobacteria	Rhizobiales	sulfur oxidation protein SoxA	E7
Alphaproteobacteria	Rhizobiales	Sulfur oxidation protein SoxB	E7
Alphaproteobacteria	Rhizobiales	sulfur oxidation protein SoxC	E7
Alphaproteobacteria	Rhodobacterales	Methanol dehydrogenase	E7
Alphaproteobacteria	Rhodobacterales	Assimilatory nitrate reductase large subunit	E7
Alphaproteobacteria	Rhodobacterales	Copper-containing nitrite reductase	E7
Alphaproteobacteria	Rhodobacterales	Ferredoxin-type protein NapF (periplasmic nitrate reductase)	E7
Alphaproteobacteria	Rhodobacterales	Polyferredoxin NapH (periplasmic nitrate reductase)	E7
Alphaproteobacteria	Rhodobacterales	Respiratory nitrate reductase	E7
Alphaproteobacteria	Rhodobacterales	Sulfate adenylyltransferase	E7
Alphaproteobacteria	Rhodobacterales	Sulfite oxidase	E7
Alphaproteobacteria	Rhodobacterales	Sulfite reductase [NADPH] hemoprotein beta-component	E7
Alphaproteobacteria	Rhodobacterales	Sulfur oxidation protein SoxB	E7
Alphaproteobacteria	Rhodobacterales	sulfur oxidation protein SoxC	E7
Alphaproteobacteria	Rhodospirillales	Methanol dehydrogenase	E7
Alphaproteobacteria	Rhodospirillales	Respiratory nitrate reductase	E7
Alphaproteobacteria	Rhodospirillales	Sulfate adenylyltransferase	E7
Alphaproteobacteria	Rhodospirillales	Sulfite oxidase	E7
Alphaproteobacteria	Rhodospirillales	Sulfite reductase beta subunit	E7
Alphaproteobacteria	Rhodospirillales	Sulfite reduction-associated complex DsrK	E7
Alphaproteobacteria	Rhodospirillales	sulfur oxidation protein SoxC	E7
Alphaproteobacteria	Rickettsiales	Sulfite oxidase	E7
Alphaproteobacteria	Sphingomonadales	Sulfate adenylyltransferase	E7
Alphaproteobacteria	Sphingomonadales	Sulfite oxidase	E7
Alphaproteobacteria	Sphingomonadales	Sulfite reductase [NADPH] hemoprotein beta-component	E7
Betaproteobacteria	Burkholderiales	Methanol dehydrogenase	E2
Betaproteobacteria	Burkholderiales	Copper-containing nitrite reductase	E2
Betaproteobacteria	Burkholderiales	Respiratory nitrate reductase	E2
Betaproteobacteria	Burkholderiales	Sulfate adenylyltransferase	E2
Betaproteobacteria	Burkholderiales	Sulfite dehydrogenase cytochrome subunit SoxD	E2
Betaproteobacteria	Burkholderiales	Sulfite oxidase	E2
Betaproteobacteria	Burkholderiales	Sulfite reductase [NADPH] hemoprotein beta-component	E2
Betaproteobacteria	Burkholderiales	Sulfur oxidation protein SoxB	E2
Betaproteobacteria	Burkholderiales	sulfur oxidation protein SoxC	E2
Betaproteobacteria	Hydrogenophilales	Sulfate adenylyltransferase	E2
Betaproteobacteria	Hydrogenophilales	Sulfite reduction-associated complex DsrK	E2
Betaproteobacteria	Hydrogenophilales	Sulfite reduction-associated complex DsrO	E2
Betaproteobacteria	Hydrogenophilales	Sulfite reduction-associated complex DsrP	E2
Betaproteobacteria	Hydrogenophilales	Sulfite reduction-associated complexDsrM	E2
Betaproteobacteria	Methylophilales	Assimilatory nitrate reductase large subunit	E2
Betaproteobacteria	Methylophilales	Copper-containing nitrite reductase	E2
Betaproteobacteria	Methylophilales	Respiratory nitrate reductase	E2
Betaproteobacteria	Methylophilales	Sulfite oxidase	E2
Betaproteobacteria	Methylophilales	Sulfite reductase [NADPH] hemoprotein beta-component	E2
Betaproteobacteria	Neisseriales	Copper-containing nitrite reductase	E2
Betaproteobacteria	Neisseriales	Respiratory nitrate reductase	E2
Betaproteobacteria	Neisseriales	Sulfate adenylyltransferase	E2
Betaproteobacteria	Neisseriales	Sulfite reductase [NADPH] hemoprotein beta-component	E2
Betaproteobacteria	Nitrosomonadales	Copper-containing nitrite reductase	E2
Betaproteobacteria	Nitrosomonadales	Sulfate adenylyltransferase	E2
Betaproteobacteria	Rhodocyclales	Respiratory nitrate reductase	E2
Betaproteobacteria	Rhodocyclales	Sulfite dehydrogenase cytochrome subunit SoxD	E2
Betaproteobacteria	Rhodocyclales	Sulfite oxidase	E2
Betaproteobacteria	Rhodocyclales	Sulfite reductase	E2
Betaproteobacteria	Rhodocyclales	Sulfite reductase beta subunit	E2
Betaproteobacteria	Rhodocyclales	Sulfite reduction-associated complex DsrK	E2
Betaproteobacteria	Rhodocyclales	Sulfite reduction-associated complex DsrO	E2
Betaproteobacteria	Rhodocyclales	Sulfite reduction-associated complexDsrM	E2
Betaproteobacteria	Burkholderiales	Methanol dehydrogenase	E44
Betaproteobacteria	Burkholderiales	naphthalene dioxygenase ferredoxin	E44
Betaproteobacteria	Burkholderiales	Toluene-4-monooxygenas	E44
Betaproteobacteria	Burkholderiales	Assimilatory nitrate reductase large subunit	E44
Betaproteobacteria	Burkholderiales	Copper-containing nitrite reductase	E44
Betaproteobacteria	Burkholderiales	Respiratory nitrate reductase	E44
Betaproteobacteria	Burkholderiales	Sulfate adenylyltransferase	E44
Betaproteobacteria	Burkholderiales	Sulfite oxidase	E44
Betaproteobacteria	Burkholderiales	Sulfite reductase [NADPH] hemoprotein beta-component	E44
Betaproteobacteria	Burkholderiales	sulfur oxidation protein SoxA	E44
Betaproteobacteria	Burkholderiales	Sulfur oxidation protein SoxB	E44
Betaproteobacteria	Burkholderiales	sulfur oxidation protein SoxC	E44
Betaproteobacteria	Hydrogenophilales	Sulfate adenylyltransferase	E44
Betaproteobacteria	Methylophilales	Methanol dehydrogenase	E44
Betaproteobacteria	Methylophilales	Assimilatory nitrate reductase large subunit	E44
Betaproteobacteria	Methylophilales	Copper-containing nitrite reductase	E44
Betaproteobacteria	Methylophilales	Sulfite reductase [NADPH] hemoprotein beta-component	E44
Betaproteobacteria	Neisseriales	Copper-containing nitrite reductase	E44
Betaproteobacteria	Neisseriales	Respiratory nitrate reductase	E44
Betaproteobacteria	Neisseriales	Sulfite oxidase	E44
Betaproteobacteria	Neisseriales	Sulfite reductase [NADPH] hemoprotein beta-component	E44
Betaproteobacteria	Nisseriales	Sulfite oxidase	E44
Betaproteobacteria	Nitrosomonadales	Copper-containing nitrite reductase	E44
Betaproteobacteria	Nitrosomonadales	Sulfate adenylyltransferase	E44
Betaproteobacteria	Rhodocyclales	Respiratory nitrate reductase	E44
Betaproteobacteria	Rhodocyclales	Sulfate adenylyltransferase	E44
Betaproteobacteria	Rhodocyclales	Sulfite oxidase	E44
Betaproteobacteria	Rhodocyclales	Sulfite reductase [NADPH] hemoprotein beta-component	E44
Betaproteobacteria	Rhodocyclales	Sulfite reductase alpha subunit	E44
Betaproteobacteria	Rhodocyclales	Sulfite reductase beta subunit	E44
Betaproteobacteria	Rhodocyclales	Sulfite reduction-associated complex DsrK	E44
Betaproteobacteria	Rhodocyclales	Sulfite reduction-associated complex DsrP	E44
Betaproteobacteria	Burkholderiales	Methanol dehydrogenase	E46
Betaproteobacteria	Burkholderiales	Assimilatory nitrate reductase large subunit	E46
Betaproteobacteria	Burkholderiales	Copper-containing nitrite reductase	E46
Betaproteobacteria	Burkholderiales	Respiratory nitrate reductase	E46
Betaproteobacteria	Burkholderiales	Sulfate adenylyltransferase	E46
Betaproteobacteria	Burkholderiales	Sulfite dehydrogenase cytochrome subunit SoxD	E46
Betaproteobacteria	Burkholderiales	Sulfite oxidase	E46
Betaproteobacteria	Burkholderiales	Sulfite reductase [NADPH] hemoprotein beta-component	E46
Betaproteobacteria	Burkholderiales	sulfonate monooxygenase	E46
Betaproteobacteria	Burkholderiales	sulfur oxidation protein SoxC	E46
Betaproteobacteria	Hydrogenophilales	Assimilatory nitrate reductase large subunit	E46
Betaproteobacteria	Hydrogenophilales	Sulfate adenylyltransferase	E46
Betaproteobacteria	Hydrogenophilales	Sulfite reduction-associated complex DsrO	E46
Betaproteobacteria	Methylophilales	Methanol dehydrogenase	E46
Betaproteobacteria	Methylophilales	Assimilatory nitrate reductase large subunit	E46
Betaproteobacteria	Methylophilales	Respiratory nitrate reductase	E46
Betaproteobacteria	Methylophilales	Sulfite oxidase	E46
Betaproteobacteria	Methylophilales	Sulfite reductase [NADPH] hemoprotein beta-component	E46
Betaproteobacteria	Neisseriales	Copper-containing nitrite reductase	E46
Betaproteobacteria	Neisseriales	Sulfate adenylyltransferase	E46
Betaproteobacteria	Nisseriales	Sulfate adenylyltransferase	E46
Betaproteobacteria	Nitrosomonadales	Copper-containing nitrite reductase	E46
Betaproteobacteria	Nitrosomonadales	Sulfate adenylyltransferase	E46
Betaproteobacteria	Rhodocyclales	Toluene-4-monooxygenas	E46
Betaproteobacteria	Rhodocyclales	Respiratory nitrate reductase	E46
Betaproteobacteria	Rhodocyclales	Sulfate adenylyltransferase	E46
Betaproteobacteria	Rhodocyclales	Sulfite oxidase	E46
Betaproteobacteria	Rhodocyclales	Sulfite reductase alpha subunit	E46
Betaproteobacteria	Rhodocyclales	Sulfite reduction-associated complex DsrK	E46
Betaproteobacteria	Rhodocyclales	Sulfite reduction-associated complex DsrO	E46
Betaproteobacteria	Burkholderiales	Methane monooxygenase component A	E47
Betaproteobacteria	Burkholderiales	Methanol dehydrogenase	E47
Betaproteobacteria	Burkholderiales	Toluene-4-monooxygenas	E47
Betaproteobacteria	Burkholderiales	Assimilatory nitrate reductase large subunit	E47
Betaproteobacteria	Burkholderiales	Copper-containing nitrite reductase	E47
Betaproteobacteria	Burkholderiales	Respiratory nitrate reductase	E47
Betaproteobacteria	Burkholderiales	Alkanesulfonate monooxygenase	E47
Betaproteobacteria	Burkholderiales	Sulfate adenylyltransferase	E47
Betaproteobacteria	Burkholderiales	Sulfite dehydrogenase cytochrome subunit SoxD	E47
Betaproteobacteria	Burkholderiales	Sulfite oxidase	E47
Betaproteobacteria	Burkholderiales	Sulfite reductase [NADPH] hemoprotein beta-component	E47
Betaproteobacteria	Burkholderiales	sulfonate monooxygenase	E47
Betaproteobacteria	Burkholderiales	Sulfur oxidation protein SoxB	E47
Betaproteobacteria	Burkholderiales	sulfur oxidation protein SoxC	E47
Betaproteobacteria	Hydrogenophilales	Respiratory nitrate reductase	E47
Betaproteobacteria	Hydrogenophilales	Sulfate adenylyltransferase	E47
Betaproteobacteria	Methylophilales	Methanol dehydrogenase	E47
Betaproteobacteria	Methylophilales	Sulfite oxidase	E47
Betaproteobacteria	Methylophilales	Sulfite reductase [NADPH] hemoprotein beta-component	E47
Betaproteobacteria	Neisseriales	Copper-containing nitrite reductase	E47
Betaproteobacteria	Neisseriales	Respiratory nitrate reductase	E47
Betaproteobacteria	Neisseriales	Sulfite oxidase	E47
Betaproteobacteria	Neisseriales	Sulfite reductase [NADPH] hemoprotein beta-component	E47
Betaproteobacteria	Nitrosomonadales	Sulfate adenylyltransferase	E47
Betaproteobacteria	Rhodocyclales	Respiratory nitrate reductase	E47
Betaproteobacteria	Rhodocyclales	Sulfate adenylyltransferase	E47
Betaproteobacteria	Rhodocyclales	Sulfite oxidase	E47
Betaproteobacteria	Rhodocyclales	Sulfite reductase [NADPH] hemoprotein beta-component	E47
Betaproteobacteria	Rhodocyclales	Sulfite reductase alpha subunit	E47
Betaproteobacteria	Rhodocyclales	Sulfite reductase beta subunit	E47
Betaproteobacteria	Rhodocyclales	Sulfite reduction-associated complex DsrK	E47
Betaproteobacteria	Burkholderiales	Methanol dehydrogenase	E7
Betaproteobacteria	Burkholderiales	Copper-containing nitrite reductase	E7
Betaproteobacteria	Burkholderiales	Respiratory nitrate reductase	E7
Betaproteobacteria	Burkholderiales	Alkanesulfonate monooxygenase	E7
Betaproteobacteria	Burkholderiales	Sulfite dehydrogenase cytochrome subunit SoxD	E7
Betaproteobacteria	Burkholderiales	Sulfite oxidase	E7
Betaproteobacteria	Burkholderiales	Sulfite reductase [NADPH] hemoprotein beta-component	E7
Betaproteobacteria	Burkholderiales	Sulfur oxidation protein SoxB	E7
Betaproteobacteria	Burkholderiales	sulfur oxidation protein SoxC	E7
Betaproteobacteria	Hydrogenophilales	Sulfate adenylyltransferase	E7
Betaproteobacteria	Hydrogenophilales	Sulfite oxidase	E7
Betaproteobacteria	Hydrogenophilales	Sulfite reduction-associated complex DsrK	E7
Betaproteobacteria	Methylophilales	Methanol dehydrogenase	E7
Betaproteobacteria	Methylophilales	Copper-containing nitrite reductase	E7
Betaproteobacteria	Methylophilales	Sulfite oxidase	E7
Betaproteobacteria	Methylophilales	Sulfite reductase [NADPH] hemoprotein beta-component	E7
Betaproteobacteria	Neisseriales	Copper-containing nitrite reductase	E7
Betaproteobacteria	Neisseriales	Sulfate adenylyltransferase	E7
Betaproteobacteria	Neisseriales	Sulfite oxidase	E7
Betaproteobacteria	Nisseriales	Sulfate adenylyltransferase	E7
Betaproteobacteria	Nitrosomonadales	Copper-containing nitrite reductase	E7
Betaproteobacteria	Nitrosomonadales	Sulfate adenylyltransferase	E7
Betaproteobacteria	Rhodocyclales	Respiratory nitrate reductase	E7
Betaproteobacteria	Rhodocyclales	Sulfate adenylyltransferase	E7
Betaproteobacteria	Rhodocyclales	Sulfite oxidase	E7
Betaproteobacteria	Rhodocyclales	Sulfite reductase [NADPH] hemoprotein beta-component	E7
Betaproteobacteria	Rhodocyclales	Sulfite reduction-associated complex DsrK	E7
Deltaproteobacteria	Bdellovibrionales	Copper-containing nitrite reductase	E2
Deltaproteobacteria	Desulfarculales	Sulfate adenylyltransferase	E2
Deltaproteobacteria	Desulfovibrionales	Sulfate adenylyltransferase	E2
Deltaproteobacteria	Desulfuromonadales	Respiratory nitrate reductase	E2
Deltaproteobacteria	Desulfuromonadales	Sulfate adenylyltransferase	E2
Deltaproteobacteria	Desulfuromonadales	Sulfite oxidase	E2
Deltaproteobacteria	Myxococcales	Respiratory nitrate reductase	E2
Deltaproteobacteria	Myxococcales	Sulfate adenylyltransferase	E2
Deltaproteobacteria	Myxococcales	Sulfite oxidase	E2
Deltaproteobacteria	Bdellovibrionales	Copper-containing nitrite reductase	E44
Deltaproteobacteria	Desulfobacterales	Respiratory nitrate reductase	E44
Deltaproteobacteria	Desulfobacterales	Sulfate adenylyltransferase	E44
Deltaproteobacteria	Desulfovibrionales	Respiratory nitrate reductase	E44
Deltaproteobacteria	Desulfovibrionales	Sulfate adenylyltransferase	E44
Deltaproteobacteria	Desulfuromonadales	Respiratory nitrate reductase	E44
Deltaproteobacteria	Desulfuromonadales	Sulfate adenylyltransferase	E44
Deltaproteobacteria	Myxococcales	Copper-containing nitrite reductase	E44
Deltaproteobacteria	Myxococcales	Respiratory nitrate reductase	E44
Deltaproteobacteria	Myxococcales	Sulfate adenylyltransferase	E44
Deltaproteobacteria	Myxococcales	Sulfite oxidase	E44
Deltaproteobacteria	Myxococcales	Sulfite reductase [NADPH] hemoprotein beta-component	E44
Deltaproteobacteria	Syntrophobacterales	Sulfate adenylyltransferase	E44
Deltaproteobacteria	Bdellovibrionales	Copper-containing nitrite reductase	E46
Deltaproteobacteria	Desulfarculales	Assimilatory nitrate reductase large subunit	E46
Deltaproteobacteria	Desulfarculales	Sulfate adenylyltransferase	E46
Deltaproteobacteria	Desulfobacterales	Assimilatory nitrate reductase large subunit	E46
Deltaproteobacteria	Desulfovibrionales	Sulfate adenylyltransferase	E46
Deltaproteobacteria	Desulfuromonadales	Respiratory nitrate reductase	E46
Deltaproteobacteria	Desulfuromonadales	Sulfate adenylyltransferase	E46
Deltaproteobacteria	Myxococcales	Respiratory nitrate reductase	E46
Deltaproteobacteria	Myxococcales	Sulfite dehydrogenase cytochrome subunit SoxD	E46
Deltaproteobacteria	Myxococcales	Sulfite oxidase	E46
Deltaproteobacteria	Myxococcales	Sulfite reductase [NADPH] hemoprotein beta-component	E46
Deltaproteobacteria	Myxococcales	sulfur oxidation protein SoxC	E46
Deltaproteobacteria	Syntrophobacterales	Sulfate adenylyltransferase	E46
Deltaproteobacteria	Bdellovibrionales	Copper-containing nitrite reductase	E47
Deltaproteobacteria	Desulfobacterales	Respiratory nitrate reductase	E47
Deltaproteobacteria	Desulfobacterales	Sulfate adenylyltransferase	E47
Deltaproteobacteria	Desulfovibrionales	Sulfate adenylyltransferase	E47
Deltaproteobacteria	Desulfuromonadales	Respiratory nitrate reductase	E47
Deltaproteobacteria	Desulfuromonadales	Sulfate adenylyltransferase	E47
Deltaproteobacteria	Desulfuromonadales	Sulfite oxidase	E47
Deltaproteobacteria	Myxococcales	Respiratory nitrate reductase	E47
Deltaproteobacteria	Myxococcales	Sulfate adenylyltransferase	E47
Deltaproteobacteria	Myxococcales	Sulfite oxidase	E47
Deltaproteobacteria	Myxococcales	Sulfite reductase [NADPH] hemoprotein beta-component	E47
Deltaproteobacteria	Myxococcales	Sulfite reduction-associated complex DsrP	E47
Deltaproteobacteria	Syntrophobacterales	Sulfate adenylyltransferase	E47
Deltaproteobacteria	Bdellovibrionales	Copper-containing nitrite reductase	E7
Deltaproteobacteria	Desulfobacterales	Sulfate adenylyltransferase	E7
Deltaproteobacteria	Desulfovibrionales	Respiratory nitrate reductase	E7
Deltaproteobacteria	Desulfovibrionales	Sulfate adenylyltransferase	E7
Deltaproteobacteria	Desulfuromonadales	Respiratory nitrate reductase	E7
Deltaproteobacteria	Desulfuromonadales	Sulfate adenylyltransferase	E7
Deltaproteobacteria	Myxococcales	Assimilatory nitrate reductase large subunit	E7
Deltaproteobacteria	Myxococcales	Respiratory nitrate reductase	E7
Deltaproteobacteria	Myxococcales	Sulfite oxidase	E7
Deltaproteobacteria	Myxococcales	Sulfite reductase [NADPH] hemoprotein beta-component	E7
Deltaproteobacteria	Syntrophobacterales	Sulfate adenylyltransferase	E7
Epsilonproteobacteria	Campylobacterales	Assimilatory nitrate reductase large subunit	E2
Epsilonproteobacteria	Campylobacterales	Sulfate adenylyltransferase	E2
Epsilonproteobacteria	Campylobacterales	Ferredoxin-type protein NapF (periplasmic nitrate reductase)	E44
Epsilonproteobacteria	Campylobacterales	Sulfate adenylyltransferase	E44
Epsilonproteobacteria	Campylobacterales	Sulfite oxidase	E44
Epsilonproteobacteria	Nautiliales	Assimilatory nitrate reductase large subunit	E44
Epsilonproteobacteria	Campylobacterales	Methanol dehydrogenase	E46
Epsilonproteobacteria	Campylobacterales	Polyferredoxin NapH (periplasmic nitrate reductase)	E46
Epsilonproteobacteria	Campylobacterales	Respiratory nitrate reductase	E46
Epsilonproteobacteria	Campylobacterales	Sulfate adenylyltransferase	E46
Epsilonproteobacteria	Campylobacterales	Sulfite oxidase	E46
Gammaproteobacteria	#N/A	Sulfate adenylyltransferase	E2
Gammaproteobacteria	Acidithiobacillales	Respiratory nitrate reductase	E2
Gammaproteobacteria	Aeromonadales	Respiratory nitrate reductase	E2
Gammaproteobacteria	Alteromonadales	Copper-containing nitrite reductase	E2
Gammaproteobacteria	Alteromonadales	Nitrate reductase cytochrome c550-type subunit]	E2
Gammaproteobacteria	Alteromonadales	Respiratory nitrate reductase	E2
Gammaproteobacteria	Alteromonadales	Sulfate adenylyltransferase	E2
Gammaproteobacteria	Alteromonadales	Sulfite oxidase	E2
Gammaproteobacteria	Alteromonadales	Sulfite reductase [NADPH] hemoprotein beta-component	E2
Gammaproteobacteria	Cellvibrionales	Nitrate reductase cytochrome c550-type subunit]	E2
Gammaproteobacteria	Cellvibrionales	Respiratory nitrate reductase	E2
Gammaproteobacteria	Cellvibrionales	Sulfate adenylyltransferase	E2
Gammaproteobacteria	Cellvibrionales	Sulfite oxidase	E2
Gammaproteobacteria	Cellvibrionales	Sulfite reductase [NADPH] hemoprotein beta-component	E2
Gammaproteobacteria	Cellvibrionales	Sulfur oxidation protein SoxB	E2
Gammaproteobacteria	Cellvibrionales	sulfur oxidation protein SoxC	E2
Gammaproteobacteria	Chromatiales	Methanol dehydrogenase	E2
Gammaproteobacteria	Chromatiales	Copper-containing nitrite reductase	E2
Gammaproteobacteria	Chromatiales	Respiratory nitrate reductase	E2
Gammaproteobacteria	Chromatiales	Sulfate adenylyltransferase	E2
Gammaproteobacteria	Chromatiales	Sulfite reductase	E2
Gammaproteobacteria	Chromatiales	Sulfite reductase [NADPH] hemoprotein beta-component	E2
Gammaproteobacteria	Chromatiales	Sulfite reductase beta subunit	E2
Gammaproteobacteria	Chromatiales	Sulfite reduction-associated complex DsrK	E2
Gammaproteobacteria	Chromatiales	Sulfite reduction-associated complex DsrO	E2
Gammaproteobacteria	Chromatiales	Sulfite reduction-associated complex DsrP	E2
Gammaproteobacteria	Chromatiales	Sulfur oxidation protein SoxB	E2
Gammaproteobacteria	Enterobacteriales	Respiratory nitrate reductase	E2
Gammaproteobacteria	Enterobacteriales	Sulfate adenylyltransferase	E2
Gammaproteobacteria	Enterobacteriales	Sulfite oxidase	E2
Gammaproteobacteria	Gammaproteobacteria Incertae Sedis	Sulfite reductase [NADPH] hemoprotein beta-component	E2
Gammaproteobacteria	Legionellales	Sulfate adenylyltransferase	E2
Gammaproteobacteria	Methylococcales	Assimilatory nitrate reductase large subunit	E2
Gammaproteobacteria	Methylococcales	Sulfate adenylyltransferase	E2
Gammaproteobacteria	Methylococcales	Sulfite oxidase	E2
Gammaproteobacteria	Methylococcales	Sulfite reductase [NADPH] hemoprotein beta-component	E2
Gammaproteobacteria	Methylococcales	sulfur oxidation protein SoxC	E2
Gammaproteobacteria	Oceanospirillales	Copper-containing nitrite reductase	E2
Gammaproteobacteria	Oceanospirillales	Respiratory nitrate reductase	E2
Gammaproteobacteria	Oceanospirillales	Sulfate adenylyltransferase	E2
Gammaproteobacteria	Oceanospirillales	Sulfite oxidase	E2
Gammaproteobacteria	Oceanospirillales	Sulfite reductase [NADPH] hemoprotein beta-component	E2
Gammaproteobacteria	Oceanospirillales	Sulfite reductase alpha subunit	E2
Gammaproteobacteria	Oceanospirillales	Sulfite reduction-associated complex DsrK	E2
Gammaproteobacteria	Oceanospirillales	Sulfite reduction-associated complex DsrO	E2
Gammaproteobacteria	Oceanospirillales	sulfur oxidation protein SoxA	E2
Gammaproteobacteria	Pasteurellales	Respiratory nitrate reductase	E2
Gammaproteobacteria	Pseudomonadales	Copper-containing nitrite reductase	E2
Gammaproteobacteria	Pseudomonadales	Respiratory nitrate reductase	E2
Gammaproteobacteria	Pseudomonadales	Sulfate adenylyltransferase	E2
Gammaproteobacteria	Pseudomonadales	Sulfite oxidase	E2
Gammaproteobacteria	Pseudomonadales	Sulfite reductase [NADPH] hemoprotein beta-component	E2
Gammaproteobacteria	Pseudomonadales	sulfonate monooxygenase	E2
Gammaproteobacteria	Pseudomonadales	Sulfur oxidation protein SoxB	E2
Gammaproteobacteria	Pseudomonadales	sulfur oxidation protein SoxC	E2
Gammaproteobacteria	Thiotrichales	Respiratory nitrate reductase	E2
Gammaproteobacteria	Thiotrichales	Sulfite reductase [NADPH] hemoprotein beta-component	E2
Gammaproteobacteria	Thiotrichales	Sulfite reduction-associated complex DsrO	E2
Gammaproteobacteria	Vibrionales	Assimilatory nitrate reductase large subunit	E2
Gammaproteobacteria	Vibrionales	Ferredoxin-type protein NapF (periplasmic nitrate reductase)	E2
Gammaproteobacteria	Vibrionales	Polyferredoxin NapH (periplasmic nitrate reductase)	E2
Gammaproteobacteria	Vibrionales	Respiratory nitrate reductase	E2
Gammaproteobacteria	Xanthomonadales	Sulfite reductase [NADPH] hemoprotein beta-component	E2
Gammaproteobacteria	#N/A	Respiratory nitrate reductase	E44
Gammaproteobacteria	#N/A	Sulfate adenylyltransferase	E44
Gammaproteobacteria	Aeromonadales	Respiratory nitrate reductase	E44
Gammaproteobacteria	Alteromonadales	Assimilatory nitrate reductase large subunit	E44
Gammaproteobacteria	Alteromonadales	Copper-containing nitrite reductase	E44
Gammaproteobacteria	Alteromonadales	Nitrate reductase cytochrome c550-type subunit]	E44
Gammaproteobacteria	Alteromonadales	Respiratory nitrate reductase	E44
Gammaproteobacteria	Alteromonadales	Sulfate adenylyltransferase	E44
Gammaproteobacteria	Alteromonadales	Sulfite oxidase	E44
Gammaproteobacteria	Alteromonadales	Sulfite reductase [NADPH] hemoprotein beta-component	E44
Gammaproteobacteria	Cardiobacteriales	Copper-containing nitrite reductase	E44
Gammaproteobacteria	Cellvibrionales	Sulfate adenylyltransferase	E44
Gammaproteobacteria	Cellvibrionales	Sulfur oxidation protein SoxB	E44
Gammaproteobacteria	Cellvibrionales	sulfur oxidation protein SoxC	E44
Gammaproteobacteria	Chromatiales	Methanol dehydrogenase	E44
Gammaproteobacteria	Chromatiales	Assimilatory nitrate reductase large subunit	E44
Gammaproteobacteria	Chromatiales	Copper-containing nitrite reductase	E44
Gammaproteobacteria	Chromatiales	Respiratory nitrate reductase	E44
Gammaproteobacteria	Chromatiales	Sulfate adenylyltransferase	E44
Gammaproteobacteria	Chromatiales	Sulfite reductase [NADPH] hemoprotein beta-component	E44
Gammaproteobacteria	Chromatiales	Sulfite reductase alpha subunit	E44
Gammaproteobacteria	Chromatiales	Sulfite reductase beta subunit	E44
Gammaproteobacteria	Chromatiales	Sulfite reduction-associated complex DsrP	E44
Gammaproteobacteria	Chromatiales	Sulfur oxidation protein SoxB	E44
Gammaproteobacteria	Enterobacteriales	Respiratory nitrate reductase	E44
Gammaproteobacteria	Enterobacteriales	Sulfate adenylyltransferase	E44
Gammaproteobacteria	Enterobacteriales	Sulfite oxidase	E44
Gammaproteobacteria	Enterobacteriales	Sulfite reductase [NADPH] hemoprotein beta-component	E44
Gammaproteobacteria	Methylococcales	Assimilatory nitrate reductase large subunit	E44
Gammaproteobacteria	Methylococcales	Sulfite oxidase	E44
Gammaproteobacteria	Methylococcales	Sulfite reductase [NADPH] hemoprotein beta-component	E44
Gammaproteobacteria	Oceanospirillales	Assimilatory nitrate reductase large subunit	E44
Gammaproteobacteria	Oceanospirillales	Copper-containing nitrite reductase	E44
Gammaproteobacteria	Oceanospirillales	Respiratory nitrate reductase	E44
Gammaproteobacteria	Oceanospirillales	Sulfate adenylyltransferase	E44
Gammaproteobacteria	Oceanospirillales	Sulfite oxidase	E44
Gammaproteobacteria	Oceanospirillales	Sulfite reductase [NADPH] hemoprotein beta-component	E44
Gammaproteobacteria	Oceanospirillales	Sulfite reductase beta subunit	E44
Gammaproteobacteria	Oceanospirillales	Sulfite reduction-associated complex DsrK	E44
Gammaproteobacteria	Oceanospirillales	Sulfite reduction-associated complex DsrP	E44
Gammaproteobacteria	Oceanospirillales	sulfur oxidation protein SoxA	E44
Gammaproteobacteria	Pasteurellales	Respiratory nitrate reductase	E44
Gammaproteobacteria	Pseudomonadales	Methanol dehydrogenase	E44
Gammaproteobacteria	Pseudomonadales	Assimilatory nitrate reductase large subunit	E44
Gammaproteobacteria	Pseudomonadales	Copper-containing nitrite reductase	E44
Gammaproteobacteria	Pseudomonadales	Respiratory nitrate reductase	E44
Gammaproteobacteria	Pseudomonadales	Sulfate adenylyltransferase	E44
Gammaproteobacteria	Pseudomonadales	Sulfite oxidase	E44
Gammaproteobacteria	Pseudomonadales	Sulfite reductase [NADPH] hemoprotein beta-component	E44
Gammaproteobacteria	Pseudomonadales	sulfonate monooxygenase	E44
Gammaproteobacteria	Thiotrichales	Respiratory nitrate reductase	E44
Gammaproteobacteria	Thiotrichales	Sulfate adenylyltransferase	E44
Gammaproteobacteria	Vibrionales	Methanol dehydrogenase	E44
Gammaproteobacteria	Vibrionales	Assimilatory nitrate reductase large subunit	E44
Gammaproteobacteria	Vibrionales	Ferredoxin-type protein NapF (periplasmic nitrate reductase)	E44
Gammaproteobacteria	Vibrionales	Nitrate reductase cytochrome c550-type subunit]	E44
Gammaproteobacteria	Vibrionales	Polyferredoxin NapH (periplasmic nitrate reductase)	E44
Gammaproteobacteria	Vibrionales	Respiratory nitrate reductase	E44
Gammaproteobacteria	Vibrionales	Sulfate adenylyltransferase	E44
Gammaproteobacteria	Vibrionales	Sulfite reductase [NADPH] hemoprotein beta-component	E44
Gammaproteobacteria	Xanthomonadales	Assimilatory nitrate reductase large subunit	E44
Gammaproteobacteria	Xanthomonadales	Sulfate adenylyltransferase	E44
Gammaproteobacteria	Xanthomonadales	Sulfite oxidase	E44
Gammaproteobacteria	#N/A	Sulfate adenylyltransferase	E46
Gammaproteobacteria	Alteromonadales	Copper-containing nitrite reductase	E46
Gammaproteobacteria	Alteromonadales	Respiratory nitrate reductase	E46
Gammaproteobacteria	Alteromonadales	Sulfate adenylyltransferase	E46
Gammaproteobacteria	Alteromonadales	Sulfite oxidase	E46
Gammaproteobacteria	Alteromonadales	Sulfite reductase [NADPH] hemoprotein beta-component	E46
Gammaproteobacteria	Cardiobacteriales	Copper-containing nitrite reductase	E46
Gammaproteobacteria	Cellvibrionales	Nitrate reductase cytochrome c550-type subunit]	E46
Gammaproteobacteria	Cellvibrionales	Respiratory nitrate reductase	E46
Gammaproteobacteria	Cellvibrionales	Sulfate adenylyltransferase	E46
Gammaproteobacteria	Cellvibrionales	Sulfite reductase [NADPH] hemoprotein beta-component	E46
Gammaproteobacteria	Cellvibrionales	sulfur oxidation protein SoxC	E46
Gammaproteobacteria	Chromatiales	Methanol dehydrogenase	E46
Gammaproteobacteria	Chromatiales	Copper-containing nitrite reductase	E46
Gammaproteobacteria	Chromatiales	Respiratory nitrate reductase	E46
Gammaproteobacteria	Chromatiales	Sulfate adenylyltransferase	E46
Gammaproteobacteria	Chromatiales	Sulfite oxidase	E46
Gammaproteobacteria	Chromatiales	Sulfite reductase [NADPH] hemoprotein beta-component	E46
Gammaproteobacteria	Chromatiales	Sulfite reductase alpha subunit	E46
Gammaproteobacteria	Chromatiales	Sulfite reduction-associated complex DsrK	E46
Gammaproteobacteria	Enterobacteriales	Respiratory nitrate reductase	E46
Gammaproteobacteria	Enterobacteriales	Sulfite oxidase	E46
Gammaproteobacteria	Legionellales	Sulfite oxidase	E46
Gammaproteobacteria	Methylococcales	Methanol dehydrogenase	E46
Gammaproteobacteria	Methylococcales	Respiratory nitrate reductase	E46
Gammaproteobacteria	Methylococcales	Sulfate adenylyltransferase	E46
Gammaproteobacteria	Methylococcales	Sulfite oxidase	E46
Gammaproteobacteria	Methylococcales	Sulfite reductase [NADPH] hemoprotein beta-component	E46
Gammaproteobacteria	Oceanospirillales	Copper-containing nitrite reductase	E46
Gammaproteobacteria	Oceanospirillales	Respiratory nitrate reductase	E46
Gammaproteobacteria	Oceanospirillales	Sulfate adenylyltransferase	E46
Gammaproteobacteria	Oceanospirillales	Sulfite oxidase	E46
Gammaproteobacteria	Oceanospirillales	Sulfite reductase [NADPH] hemoprotein beta-component	E46
Gammaproteobacteria	Pasteurellales	Respiratory nitrate reductase	E46
Gammaproteobacteria	Pasteurellales	Sulfite oxidase	E46
Gammaproteobacteria	Pseudomonadales	Methanol dehydrogenase	E46
Gammaproteobacteria	Pseudomonadales	Copper-containing nitrite reductase	E46
Gammaproteobacteria	Pseudomonadales	Nitrate reductase cytochrome c550-type subunit]	E46
Gammaproteobacteria	Pseudomonadales	Respiratory nitrate reductase	E46
Gammaproteobacteria	Pseudomonadales	Sulfate adenylyltransferase	E46
Gammaproteobacteria	Pseudomonadales	Sulfite oxidase	E46
Gammaproteobacteria	Pseudomonadales	Sulfite reductase [NADPH] hemoprotein beta-component	E46
Gammaproteobacteria	Pseudomonadales	sulfonate monooxygenase	E46
Gammaproteobacteria	Pseudomonadales	sulfur oxidation protein SoxC	E46
Gammaproteobacteria	Thiotrichales	Respiratory nitrate reductase	E46
Gammaproteobacteria	Thiotrichales	Sulfite reduction-associated complex DsrK	E46
Gammaproteobacteria	Thiotrichales	sulfonate monooxygenase	E46
Gammaproteobacteria	Vibrionales	Methanol dehydrogenase	E46
Gammaproteobacteria	Vibrionales	Assimilatory nitrate reductase large subunit	E46
Gammaproteobacteria	Vibrionales	Ferredoxin-type protein NapF (periplasmic nitrate reductase)	E46
Gammaproteobacteria	Vibrionales	Nitrate reductase cytochrome c550-type subunit]	E46
Gammaproteobacteria	Vibrionales	Polyferredoxin NapH (periplasmic nitrate reductase)	E46
Gammaproteobacteria	Vibrionales	Respiratory nitrate reductase	E46
Gammaproteobacteria	Vibrionales	Sulfate adenylyltransferase	E46
Gammaproteobacteria	Vibrionales	Sulfite oxidase	E46
Gammaproteobacteria	Xanthomonadales	Methanol dehydrogenase	E46
Gammaproteobacteria	Xanthomonadales	Sulfate adenylyltransferase	E46
Gammaproteobacteria	Xanthomonadales	Sulfite oxidase	E46
Gammaproteobacteria	#N/A	Sulfate adenylyltransferase	E47
Gammaproteobacteria	Aeromonadales	Respiratory nitrate reductase	E47
Gammaproteobacteria	Aeromonadales	Sulfate adenylyltransferase	E47
Gammaproteobacteria	Aeromonadales	Sulfite reductase [NADPH] hemoprotein beta-component	E47
Gammaproteobacteria	Alteromonadales	Assimilatory nitrate reductase large subunit	E47
Gammaproteobacteria	Alteromonadales	Copper-containing nitrite reductase	E47
Gammaproteobacteria	Alteromonadales	Nitrate reductase cytochrome c550-type subunit]	E47
Gammaproteobacteria	Alteromonadales	Respiratory nitrate reductase	E47
Gammaproteobacteria	Alteromonadales	Sulfate adenylyltransferase	E47
Gammaproteobacteria	Alteromonadales	Sulfite oxidase	E47
Gammaproteobacteria	Alteromonadales	Sulfite reductase [NADPH] hemoprotein beta-component	E47
Gammaproteobacteria	Cardiobacteriales	Copper-containing nitrite reductase	E47
Gammaproteobacteria	Cellvibrionales	Assimilatory nitrate reductase large subunit	E47
Gammaproteobacteria	Cellvibrionales	Respiratory nitrate reductase	E47
Gammaproteobacteria	Cellvibrionales	Sulfate adenylyltransferase	E47
Gammaproteobacteria	Cellvibrionales	Sulfite dehydrogenase cytochrome subunit SoxD	E47
Gammaproteobacteria	Cellvibrionales	Sulfite oxidase	E47
Gammaproteobacteria	Cellvibrionales	Sulfite reductase [NADPH] hemoprotein beta-component	E47
Gammaproteobacteria	Cellvibrionales	sulfur oxidation protein SoxC	E47
Gammaproteobacteria	Chromatiales	Methanol dehydrogenase	E47
Gammaproteobacteria	Chromatiales	Assimilatory nitrate reductase large subunit	E47
Gammaproteobacteria	Chromatiales	Copper-containing nitrite reductase	E47
Gammaproteobacteria	Chromatiales	Respiratory nitrate reductase	E47
Gammaproteobacteria	Chromatiales	Sulfate adenylyltransferase	E47
Gammaproteobacteria	Chromatiales	Sulfite oxidase	E47
Gammaproteobacteria	Chromatiales	Sulfite reductase	E47
Gammaproteobacteria	Chromatiales	Sulfite reductase alpha subunit	E47
Gammaproteobacteria	Chromatiales	Sulfite reductase beta subunit	E47
Gammaproteobacteria	Chromatiales	Sulfite reduction-associated complex DsrK	E47
Gammaproteobacteria	Enterobacteriales	Assimilatory nitrate reductase large subunit	E47
Gammaproteobacteria	Enterobacteriales	Respiratory nitrate reductase	E47
Gammaproteobacteria	Enterobacteriales	Sulfate adenylyltransferase	E47
Gammaproteobacteria	Enterobacteriales	Sulfite oxidase	E47
Gammaproteobacteria	Gammaproteobacteria Incertae Sedis	Sulfite reductase [NADPH] hemoprotein beta-component	E47
Gammaproteobacteria	Methylococcales	Sulfite oxidase	E47
Gammaproteobacteria	Methylococcales	Sulfite reductase [NADPH] hemoprotein beta-component	E47
Gammaproteobacteria	Oceanospirillales	Assimilatory nitrate reductase large subunit	E47
Gammaproteobacteria	Oceanospirillales	Copper-containing nitrite reductase	E47
Gammaproteobacteria	Oceanospirillales	Respiratory nitrate reductase	E47
Gammaproteobacteria	Oceanospirillales	Sulfate adenylyltransferase	E47
Gammaproteobacteria	Oceanospirillales	Sulfite oxidase	E47
Gammaproteobacteria	Oceanospirillales	Sulfite reductase [NADPH] hemoprotein beta-component	E47
Gammaproteobacteria	Oceanospirillales	Sulfite reduction-associated complex DsrK	E47
Gammaproteobacteria	Pasteurellales	Respiratory nitrate reductase	E47
Gammaproteobacteria	Pasteurellales	Sulfite oxidase	E47
Gammaproteobacteria	Pseudomonadales	Assimilatory nitrate reductase large subunit	E47
Gammaproteobacteria	Pseudomonadales	Copper-containing nitrite reductase	E47
Gammaproteobacteria	Pseudomonadales	Nitrate reductase cytochrome c550-type subunit]	E47
Gammaproteobacteria	Pseudomonadales	Respiratory nitrate reductase	E47
Gammaproteobacteria	Pseudomonadales	Sulfate adenylyltransferase	E47
Gammaproteobacteria	Pseudomonadales	Sulfite oxidase	E47
Gammaproteobacteria	Pseudomonadales	Sulfite reductase [NADPH] hemoprotein beta-component	E47
Gammaproteobacteria	Thiotrichales	Methanol dehydrogenase	E47
Gammaproteobacteria	Thiotrichales	Respiratory nitrate reductase	E47
Gammaproteobacteria	Thiotrichales	Sulfite oxidase	E47
Gammaproteobacteria	Thiotrichales	Sulfite reductase beta subunit	E47
Gammaproteobacteria	Thiotrichales	Sulfite reduction-associated complex DsrK	E47
Gammaproteobacteria	Vibrionales	Assimilatory nitrate reductase large subunit	E47
Gammaproteobacteria	Vibrionales	Ferredoxin-type protein NapF (periplasmic nitrate reductase)	E47
Gammaproteobacteria	Vibrionales	Polyferredoxin NapH (periplasmic nitrate reductase)	E47
Gammaproteobacteria	Vibrionales	Respiratory nitrate reductase	E47
Gammaproteobacteria	Vibrionales	Sulfate adenylyltransferase	E47
Gammaproteobacteria	Vibrionales	Sulfite oxidase	E47
Gammaproteobacteria	Vibrionales	Sulfite reductase [NADPH] hemoprotein beta-component	E47
Gammaproteobacteria	Xanthomonadales	Sulfate adenylyltransferase	E47
Gammaproteobacteria	Xanthomonadales	Sulfite oxidase	E47
Gammaproteobacteria	Xanthomonadales	Sulfite reductase [NADPH] hemoprotein beta-component	E47
Gammaproteobacteria	#N/A	Sulfate adenylyltransferase	E7
Gammaproteobacteria	Acidithiobacillales	Sulfite reductase [NADPH] hemoprotein beta-component	E7
Gammaproteobacteria	Aeromonadales	Respiratory nitrate reductase	E7
Gammaproteobacteria	Alteromonadales	Assimilatory nitrate reductase large subunit	E7
Gammaproteobacteria	Alteromonadales	Copper-containing nitrite reductase	E7
Gammaproteobacteria	Alteromonadales	Nitrate reductase cytochrome c550-type subunit]	E7
Gammaproteobacteria	Alteromonadales	Respiratory nitrate reductase	E7
Gammaproteobacteria	Alteromonadales	Sulfate adenylyltransferase	E7
Gammaproteobacteria	Alteromonadales	Sulfite oxidase	E7
Gammaproteobacteria	Alteromonadales	Sulfite reductase [NADPH] hemoprotein beta-component	E7
Gammaproteobacteria	Cardiobacteriales	Copper-containing nitrite reductase	E7
Gammaproteobacteria	Cellvibrionales	Assimilatory nitrate reductase large subunit	E7
Gammaproteobacteria	Cellvibrionales	Respiratory nitrate reductase	E7
Gammaproteobacteria	Cellvibrionales	Sulfate adenylyltransferase	E7
Gammaproteobacteria	Cellvibrionales	Sulfite oxidase	E7
Gammaproteobacteria	Cellvibrionales	Sulfite reductase [NADPH] hemoprotein beta-component	E7
Gammaproteobacteria	Cellvibrionales	sulfur oxidation protein SoxC	E7
Gammaproteobacteria	Chromatiales	Methanol dehydrogenase	E7
Gammaproteobacteria	Chromatiales	Respiratory nitrate reductase	E7
Gammaproteobacteria	Chromatiales	Sulfate adenylyltransferase	E7
Gammaproteobacteria	Chromatiales	Sulfite reductase [NADPH] hemoprotein beta-component	E7
Gammaproteobacteria	Chromatiales	Sulfite reduction-associated complex DsrK	E7
Gammaproteobacteria	Chromatiales	Sulfite reduction-associated complexDsrM	E7
Gammaproteobacteria	Chromatiales	Sulfur oxidation protein SoxB	E7
Gammaproteobacteria	Enterobacteriales	Respiratory nitrate reductase	E7
Gammaproteobacteria	Enterobacteriales	Sulfate adenylyltransferase	E7
Gammaproteobacteria	Gammaproteobacteria Incertae Sedis	Sulfate adenylyltransferase	E7
Gammaproteobacteria	Legionellales	Sulfate adenylyltransferase	E7
Gammaproteobacteria	Methylococcales	Methanol dehydrogenase	E7
Gammaproteobacteria	Methylococcales	Sulfate adenylyltransferase	E7
Gammaproteobacteria	Methylococcales	Sulfite oxidase	E7
Gammaproteobacteria	Methylococcales	Sulfite reductase [NADPH] hemoprotein beta-component	E7
Gammaproteobacteria	Oceanospirillales	Copper-containing nitrite reductase	E7
Gammaproteobacteria	Oceanospirillales	Nitrate reductase cytochrome c550-type subunit]	E7
Gammaproteobacteria	Oceanospirillales	Respiratory nitrate reductase	E7
Gammaproteobacteria	Oceanospirillales	Sulfate adenylyltransferase	E7
Gammaproteobacteria	Oceanospirillales	Sulfite oxidase	E7
Gammaproteobacteria	Oceanospirillales	Sulfite reductase	E7
Gammaproteobacteria	Oceanospirillales	Sulfite reductase [NADPH] hemoprotein beta-component	E7
Gammaproteobacteria	Pasteurellales	Respiratory nitrate reductase	E7
Gammaproteobacteria	Pasteurellales	Sulfite oxidase	E7
Gammaproteobacteria	Pseudomonadales	Methanol dehydrogenase	E7
Gammaproteobacteria	Pseudomonadales	Assimilatory nitrate reductase large subunit	E7
Gammaproteobacteria	Pseudomonadales	Copper-containing nitrite reductase	E7
Gammaproteobacteria	Pseudomonadales	Nitrate reductase cytochrome c550-type subunit]	E7
Gammaproteobacteria	Pseudomonadales	Respiratory nitrate reductase	E7
Gammaproteobacteria	Pseudomonadales	Alkanesulfonate monooxygenase	E7
Gammaproteobacteria	Pseudomonadales	Sulfate adenylyltransferase	E7
Gammaproteobacteria	Pseudomonadales	Sulfite oxidase	E7
Gammaproteobacteria	Pseudomonadales	Sulfite reductase [NADPH] hemoprotein beta-component	E7
Gammaproteobacteria	Thiotrichales	Methanol dehydrogenase	E7
Gammaproteobacteria	Thiotrichales	Sulfite reduction-associated complex DsrK	E7
Gammaproteobacteria	Vibrionales	Assimilatory nitrate reductase large subunit	E7
Gammaproteobacteria	Vibrionales	Ferredoxin-type protein NapF (periplasmic nitrate reductase)	E7
Gammaproteobacteria	Vibrionales	Nitrate reductase cytochrome c550-type subunit]	E7
Gammaproteobacteria	Vibrionales	Polyferredoxin NapH (periplasmic nitrate reductase)	E7
Gammaproteobacteria	Vibrionales	Respiratory nitrate reductase	E7

## Sheet: Table VI
Supplementary Table VI. Lisf of core metabolic pathways observed across metagenomes. The number of ORFs within and their coverage (% from the total number of reactions) is shown.
Pathway common name	ORFs count					Coverage (%)
	E2	E7	E44	E46	E47	E2	E7	E44	E46	E47
(1,4)-beta-D-xylan degradation	12	10	9	19	5	50.00	50.00	50.00	50.00	50.00
(Kdo)2-lipid A biosynthesis I (E. coli)	3	4	5	1	4	50.00	100.00	100.00	50.00	100.00
[2Fe-2S] iron-sulfur cluster biosynthesis	12	3	12	19	13	20.00	20.00	20.00	20.00	20.00
1,2-dichloroethane degradation	4	7	9	4	10	25.00	50.00	50.00	50.00	50.00
2-amino-3-carboxymuconate semialdehyde degradation to 2-hydroxypentadienoate	2	4	3	3	2	50.00	50.00	75.00	50.00	50.00
2-amino-3-carboxymuconate semialdehyde degradation to glutaryl-CoA	5	7	5	4	5	60.00	60.00	60.00	60.00	60.00
2-oxobutanoate degradation II	6	4	6	6	6	50.00	50.00	50.00	50.00	50.00
2-oxoglutarate decarboxylation to succinyl-CoA	11	14	11	16	21	100.00	100.00	100.00	100.00	100.00
3-dehydroquinate biosynthesis I	11	12	6	11	11	100.00	100.00	100.00	100.00	100.00
3-oxoadipate degradation	7	1	3	6	5	100.00	0.00	50.00	100.00	100.00
4-amino-2-methyl-5-diphosphomethylpyrimidine biosynthesis I	7	7	7	8	4	100.00	100.00	100.00	100.00	100.00
4-aminobenzoate biosynthesis	7	6	6	6	8	100.00	50.00	100.00	100.00	100.00
4-hydroxy-4-methyl-L-glutamate biosynthesis	1	1	1	3	3	50.00	50.00	50.00	50.00	50.00
4-hydroxyphenylpyruvate biosynthesis	3	5	3	3	5	100.00	100.00	100.00	100.00	100.00
5-aminoimidazole ribonucleotide biosynthesis I	26	26	23	23	19	80.00	100.00	80.00	100.00	80.00
5-oxo-L-proline metabolism	8	3	5	5	10	33.33	50.00	33.33	33.33	33.33
acetate conversion to acetyl-CoA	6	9	9	17	13	100.00	100.00	100.00	100.00	100.00
acetone degradation II (to acetoacetate)	8	3	4	6	1	50.00	50.00	50.00	50.00	50.00
acrylonitrile degradation I	23	30	28	30	30	100.00	100.00	100.00	100.00	50.00
adenosine nucleotides degradation I	14	19	20	13	14	62.50	50.00	62.50	50.00	37.50
adenosine nucleotides degradation II	15	16	22	13	15	100.00	100.00	100.00	60.00	60.00
adenosine ribonucleotides de novo biosynthesis	9	7	10	10	6	100.00	100.00	100.00	100.00	100.00
adenosylcobalamin salvage from cobalamin	2	2	4	5	2	60.00	60.00	60.00	60.00	60.00
aerobic respiration I (cytochrome c)	157	135	143	178	186	100.00	75.00	75.00	100.00	75.00
alanine racemization	7	5	3	6	3	100.00	100.00	100.00	100.00	100.00
arsenite oxidation II (respiratory)	1	1	1	1	1	100.00	100.00	100.00	100.00	100.00
autoinducer AI-2 degradation	2	2	3	1	1	33.33	33.33	33.33	33.33	33.33
bacillithiol biosynthesis	4	3	2	3	3	66.67	66.67	66.67	33.33	100.00
barbaloin biosynthesis	1	1	3	1	1	20.00	20.00	20.00	20.00	20.00
biotin-carboxyl carrier protein assembly	15	8	11	13	16	75.00	75.00	75.00	75.00	75.00
canavanine biosynthesis	13	17	14	17	12	50.00	50.00	50.00	50.00	50.00
cardiolipin biosynthesis II	5	3	4	5	4	66.67	66.67	66.67	66.67	66.67
chlorophyll a biosynthesis II	5	5	2	7	2	60.00	60.00	60.00	60.00	60.00
chorismate biosynthesis from 3-dehydroquinate	19	18	15	28	17	80.00	80.00	80.00	100.00	80.00
CMP phosphorylation	2	1	1	1	3	50.00	50.00	50.00	50.00	50.00
CMP-3-deoxy-D-manno-octulosonate biosynthesis	2	4	1	1	10	20.00	40.00	20.00	20.00	80.00
cob(II)yrinate a,c-diamide biosynthesis I (early cobalt insertion)	19	17	15	23	28	40.00	33.33	33.33	46.67	40.00
coenzyme B/coenzyme M regeneration I (methanophenazine-dependent)	3	2	2	1	2	75.00	50.00	25.00	25.00	50.00
creatinine degradation I	3	6	2	5	1	50.00	75.00	25.00	50.00	25.00
creatinine degradation II	5	5	3	4	3	60.00	60.00	20.00	60.00	20.00
D-mannose degradation	13	12	7	18	7	100.00	100.00	100.00	100.00	100.00
D-myo-inositol (1,4,5)-trisphosphate degradation	2	3	4	6	2	33.33	33.33	33.33	33.33	66.67
demethylmenaquinol-8 biosynthesis II	2	1	1	2	1	100.00	100.00	100.00	100.00	100.00
di-trans,poly-cis-undecaprenyl phosphate biosynthesis	11	4	4	2	12	100.00	100.00	100.00	100.00	100.00
diacylglycerol and triacylglycerol biosynthesis	14	17	12	20	3	57.14	57.14	57.14	42.86	28.57
diploterol biosynthesis	2	6	2	1	3	50.00	50.00	50.00	50.00	50.00
dTDP-L-rhamnose biosynthesis	6	10	12	14	11	75.00	100.00	100.00	75.00	100.00
ethanol degradation IV	30	20	29	40	35	66.67	66.67	66.67	66.67	66.67
ethylbenzene degradation (anaerobic)	7	4	7	2	2	40.00	40.00	40.00	20.00	20.00
factor 420 polyglutamylation	1	1	1	1	1	50.00	50.00	50.00	50.00	50.00
fatty acid beta-oxidation III (unsaturated, odd number)	1	1	1	1	1	100.00	100.00	100.00	100.00	100.00
fatty acid beta-oxidation IV (unsaturated, even number)	3	1	1	1	2	40.00	40.00	40.00	40.00	40.00
fatty acid biosynthesis initiation (bacteria and plants)	14	10	13	11	17	100.00	100.00	100.00	100.00	100.00
flavin biosynthesis I (bacteria and plants)	44	42	62	65	45	100.00	77.78	77.78	88.89	77.78
folate polyglutamylation	18	29	15	20	25	100.00	80.00	80.00	80.00	100.00
folate transformations III (E. coli)	43	46	37	68	38	88.89	100.00	88.89	88.89	88.89
formaldehyde oxidation II (glutathione-dependent)	14	10	8	17	13	66.67	66.67	66.67	66.67	66.67
GDP-L-fucose biosynthesis I (from GDP-D-mannose)	3	5	3	6	2	66.67	100.00	100.00	100.00	100.00
GDP-mannose biosynthesis	38	38	29	55	28	75.00	75.00	75.00	75.00	75.00
geranyl diphosphate biosynthesis	1	4	2	3	4	100.00	100.00	100.00	100.00	100.00
glutaminyl-tRNAgln biosynthesis via transamidation	99	75	67	96	103	75.00	75.00	75.00	75.00	75.00
glutathione degradation (DUG pathway - yeast)	12	16	16	15	21	50.00	50.00	50.00	100.00	50.00
glutathione-glutaredoxin redox reactions	1	2	3	2	2	100.00	100.00	100.00	100.00	100.00
glycerol-3-phosphate to cytochrome bo oxidase electron transfer	9	7	11	6	7	100.00	100.00	100.00	100.00	100.00
glycerol-3-phosphate to fumarate electron transfer	49	39	46	53	60	100.00	100.00	100.00	100.00	100.00
glycerophosphodiester degradation	11	9	12	10	6	100.00	100.00	100.00	100.00	100.00
glycine biosynthesis I	2	3	2	1	5	100.00	100.00	100.00	100.00	100.00
glycine cleavage	14	23	19	20	20	100.00	100.00	100.00	100.00	100.00
glyoxylate cycle	44	43	31	54	43	100.00	83.33	83.33	83.33	83.33
guanine and guanosine salvage	4	2	1	4	1	50.00	50.00	50.00	50.00	50.00
guanine and guanosine salvage II	4	2	1	4	1	50.00	50.00	50.00	50.00	50.00
guanosine ribonucleotides de novo biosynthesis	13	16	7	11	9	100.00	75.00	75.00	75.00	50.00
guanylyl molybdenum cofactor biosynthesis	2	3	1	2	4	100.00	100.00	100.00	100.00	100.00
heme a biosynthesis	4	3	3	7	4	100.00	75.00	100.00	100.00	100.00
heparin degradation	2	3	3	3	3	20.00	40.00	40.00	40.00	40.00
hydroxymethylpyrimidine salvage	17	9	20	28	22	100.00	100.00	100.00	100.00	100.00
hypusine biosynthesis	6	8	5	9	5	80.00	80.00	80.00	80.00	80.00
indole-3-acetate biosynthesis V (bacteria and fungi)	3	5	4	7	6	100.00	100.00	100.00	100.00	100.00
inosine 5-phosphate degradation	15	20	22	12	14	100.00	100.00	100.00	50.00	50.00
inosine-5-phosphate biosynthesis II	37	30	40	43	28	100.00	80.00	80.00	100.00	100.00
L-alanine biosynthesis III	13	4	12	24	15	100.00	100.00	100.00	100.00	100.00
L-arginine biosynthesis II (acetyl cycle)	36	39	46	58	47	88.89	66.67	88.89	100.00	88.89
L-arginine degradation II (AST pathway)	8	3	3	11	8	60.00	40.00	40.00	60.00	40.00
L-arginine degradation III (arginine decarboxylase/agmatinase pathway)	8	5	6	9	6	100.00	50.00	100.00	100.00	100.00
L-asparagine biosynthesis I	11	7	14	14	17	100.00	100.00	100.00	100.00	100.00
L-asparagine biosynthesis II	11	7	14	14	17	100.00	100.00	100.00	100.00	100.00
L-asparagine degradation III (mammalian)	8	4	8	7	8	66.67	66.67	66.67	66.67	100.00
L-aspartate biosynthesis	3	3	2	2	3	100.00	100.00	100.00	100.00	100.00
L-aspartate degradation I	3	3	2	2	3	100.00	100.00	100.00	100.00	100.00
L-carnitine degradation I	14	15	14	14	12	75.00	50.00	50.00	50.00	50.00
L-cysteine biosynthesis I	8	4	9	6	8	100.00	50.00	100.00	50.00	100.00
L-glutamate biosynthesis II	1	1	5	3	3	100.00	100.00	100.00	100.00	100.00
L-glutamate biosynthesis III	1	2	5	4	6	100.00	100.00	100.00	100.00	100.00
L-glutamate degradation I	4	5	8	8	9	100.00	100.00	100.00	100.00	100.00
L-glutamate degradation VI (to pyruvate)	2	5	4	4	6	25.00	50.00	50.00	50.00	50.00
L-glutamate degradation X	1	1	5	3	3	100.00	100.00	100.00	100.00	100.00
L-glutamine degradation I	99	75	67	96	103	100.00	100.00	100.00	100.00	100.00
L-histidine biosynthesis	29	29	24	44	23	100.00	100.00	80.00	100.00	100.00
L-homocysteine biosynthesis	5	5	10	2	8	50.00	50.00	100.00	50.00	50.00
L-homoserine biosynthesis	32	29	19	31	40	100.00	66.67	66.67	100.00	100.00
L-isoleucine biosynthesis I (from threonine)	49	32	35	42	44	85.71	85.71	85.71	85.71	71.43
L-isoleucine biosynthesis IV	46	29	36	41	45	50.00	66.67	50.00	50.00	50.00
L-leucine biosynthesis	30	25	19	24	25	83.33	83.33	66.67	66.67	83.33
L-methionine salvage from L-homocysteine	24	14	14	43	17	66.67	66.67	100.00	100.00	66.67
L-ornithine biosynthesis I	10	9	16	21	15	80.00	60.00	100.00	100.00	100.00
L-ornithine degradation II (Stickland reaction)	5	8	5	6	2	44.44	55.56	44.44	55.56	22.22
L-phenylalanine biosynthesis I	9	12	6	10	8	100.00	100.00	100.00	100.00	100.00
L-phenylalanine biosynthesis III (cytosolic, plants)	2	4	3	8	4	50.00	100.00	100.00	100.00	100.00
L-proline biosynthesis I (from L-glutamate)	5	5	8	6	8	75.00	75.00	100.00	75.00	100.00
L-proline degradation	24	23	20	35	30	100.00	100.00	100.00	100.00	100.00
L-selenocysteine biosynthesis I (bacteria)	9	5	10	12	7	100.00	100.00	100.00	100.00	100.00
L-selenocysteine biosynthesis II (archaea and eukaryotes)	5	2	8	7	3	50.00	50.00	50.00	50.00	50.00
L-serine biosynthesis I	5	14	10	10	12	66.67	100.00	66.67	100.00	100.00
L-serine degradation	7	4	3	5	6	100.00	100.00	100.00	100.00	100.00
L-threonine biosynthesis	13	7	10	14	7	100.00	100.00	100.00	100.00	100.00
L-threonine degradation V	7	6	4	6	5	50.00	50.00	50.00	50.00	50.00
L-tryptophan biosynthesis	17	12	15	20	21	83.33	66.67	66.67	83.33	83.33
L-tyrosine biosynthesis I	26	22	16	30	25	100.00	100.00	100.00	100.00	100.00
L-tyrosine degradation I	7	9	7	4	6	60.00	100.00	80.00	40.00	40.00
leukotriene biosynthesis	18	15	15	13	13	33.33	33.33	33.33	33.33	33.33
lipid IVA biosynthesis (E. coli)	11	9	5	10	15	66.67	83.33	50.00	83.33	83.33
lipid IVA biosynthesis (P. putida)	11	9	5	10	15	66.67	83.33	50.00	83.33	83.33
lipoprotein posttranslational modification	11	14	11	13	10	75.00	75.00	75.00	75.00	75.00
menaquinol-4 biosynthesis II	7	6	4	6	2	33.33	33.33	33.33	33.33	33.33
methanogenesis from trimethylamine	3	3	1	1	2	50.00	50.00	50.00	50.00	50.00
methylglyoxal degradation I	2	2	1	2	3	33.33	66.67	33.33	66.67	33.33
mevalonate degradation	7	3	3	11	9	100.00	100.00	100.00	100.00	100.00
molybdenum cofactor biosynthesis	21	17	25	46	31	75.00	62.50	75.00	75.00	75.00
mycothiol biosynthesis	4	7	2	9	4	33.33	33.33	33.33	50.00	33.33
myo-inositol biosynthesis	7	8	6	13	5	100.00	100.00	100.00	100.00	100.00
N6-L-threonylcarbamoyladenosine37-modified tRNA biosynthesis	14	11	12	21	10	100.00	50.00	100.00	100.00	100.00
NAD de novo biosynthesis I (from aspartate)	17	15	16	22	20	66.67	100.00	100.00	100.00	66.67
NAD salvage pathway V (PNC V cycle)	10	11	10	7	9	60.00	80.00	80.00	80.00	60.00
NAD/NADH phosphorylation and dephosphorylation	79	78	73	80	105	66.67	50.00	50.00	50.00	50.00
NADH repair (prokaryotes)	6	8	9	25	19	50.00	50.00	50.00	50.00	50.00
NADH to cytochrome bd oxidase electron transfer I	83	69	67	72	94	100.00	100.00	100.00	100.00	100.00
NADH to cytochrome bo oxidase electron transfer I	78	68	67	72	92	100.00	100.00	100.00	100.00	100.00
NADP biosynthesis	5	4	2	5	4	100.00	100.00	100.00	100.00	100.00
NADPH repair (prokaryotes)	6	8	9	25	19	50.00	50.00	50.00	50.00	50.00
oleate biosynthesis II (animals and fungi)	2	2	2	4	3	50.00	50.00	50.00	50.00	50.00
ophthalmate biosynthesis	4	1	3	2	4	66.67	33.33	33.33	33.33	66.67
oxalate degradation II	3	4	3	5	1	33.33	66.67	33.33	33.33	33.33
pentose phosphate pathway (oxidative branch) I	2	6	6	5	8	66.67	100.00	100.00	100.00	66.67
pentose phosphate pathway (partial)	10	14	5	21	18	100.00	100.00	100.00	100.00	100.00
phenylmercury acetate degradation	3	2	5	6	5	100.00	100.00	100.00	100.00	100.00
phospholipid remodeling (phosphatidylethanolamine, yeast)	9	7	4	6	3	50.00	50.00	25.00	50.00	50.00
phosphopantothenate biosynthesis I	17	15	9	12	10	100.00	100.00	100.00	100.00	100.00
phosphopantothenate biosynthesis III (archaebacteria)	10	7	8	10	12	75.00	75.00	75.00	75.00	75.00
phytyl diphosphate biosynthesis	5	5	2	7	2	100.00	100.00	100.00	100.00	100.00
polyphosphate metabolism	4	3	6	2	9	50.00	100.00	100.00	100.00	100.00
ppGpp metabolism	53	44	51	68	61	100.00	66.67	100.00	100.00	66.67
preQ0 biosynthesis	5	7	9	6	6	75.00	100.00	75.00	50.00	75.00
proline to cytochrome bo oxidase electron transfer	28	23	20	32	31	100.00	100.00	100.00	100.00	100.00
propanoyl CoA degradation I	17	9	14	17	17	100.00	100.00	100.00	66.67	66.67
protein S-nitrosylation and denitrosylation	13	9	7	15	11	20.00	20.00	20.00	20.00	20.00
protocatechuate degradation II (ortho-cleavage pathway)	3	2	3	1	6	50.00	50.00	50.00	25.00	75.00
PRPP biosynthesis	11	5	6	10	7	100.00	100.00	100.00	100.00	100.00
putrescine biosynthesis I	8	5	6	9	6	100.00	50.00	100.00	100.00	100.00
pyridoxal 5-phosphate biosynthesis I	16	10	9	11	9	57.14	57.14	57.14	57.14	57.14
pyridoxal 5-phosphate biosynthesis II	3	3	1	5	4	100.00	100.00	100.00	100.00	100.00
pyrimidine deoxyribonucleotides de novo biosynthesis I	24	21	16	40	22	77.78	55.56	66.67	88.89	55.56
pyrimidine deoxyribonucleotides de novo biosynthesis III	33	21	24	43	22	77.78	55.56	66.67	88.89	55.56
pyrimidine deoxyribonucleotides de novo biosynthesis IV	21	17	13	38	17	71.43	42.86	57.14	71.43	42.86
pyrimidine deoxyribonucleotides dephosphorylation	3	4	3	2	5	0.00	33.33	33.33	33.33	33.33
pyrimidine nucleobases salvage I	1	2	2	1	1	100.00	100.00	100.00	100.00	100.00
pyrimidine ribonucleosides salvage I	4	3	3	6	5	66.67	66.67	66.67	66.67	66.67
pyruvate decarboxylation to acetyl CoA I	9	14	12	18	17	100.00	100.00	100.00	100.00	100.00
queuosine biosynthesis I (de novo)	8	8	6	7	9	75.00	75.00	50.00	75.00	50.00
S-methyl-L-methionine cycle	13	3	6	12	6	50.00	50.00	50.00	50.00	50.00
selenate reduction	18	28	20	18	28	20.00	20.00	20.00	20.00	20.00
seleno-amino acid biosynthesis (plants)	8	2	8	4	6	60.00	20.00	40.00	40.00	60.00
siroheme biosynthesis	16	13	14	17	23	100.00	100.00	100.00	100.00	100.00
spermidine biosynthesis I	13	14	21	20	14	50.00	50.00	50.00	100.00	100.00
spermine biosynthesis	1	2	1	3	2	50.00	50.00	50.00	100.00	100.00
succinate to cytochrome bd oxidase electron transfer	50	35	48	62	65	100.00	100.00	100.00	100.00	100.00
succinate to cytochrome bo oxidase electron transfer	45	34	48	62	63	100.00	100.00	100.00	100.00	100.00
sulfate activation for sulfonation	19	29	20	20	29	100.00	100.00	100.00	100.00	100.00
sulfide oxidation IV (mitochondria)	2	4	1	4	3	20.00	20.00	20.00	20.00	20.00
sulfite oxidation III	23	34	28	23	37	100.00	100.00	100.00	100.00	100.00
superoxide radicals degradation	25	11	21	26	24	100.00	50.00	100.00	100.00	100.00
taurine degradation IV	1	2	1	3	7	100.00	100.00	100.00	100.00	100.00
TCA cycle I (prokaryotic)	61	56	62	93	79	90.00	70.00	90.00	90.00	90.00
TCA cycle VI (Helicobacter)	85	63	62	86	85	100.00	66.67	100.00	100.00	100.00
tetrahydrofolate biosynthesis	21	29	19	24	21	100.00	100.00	100.00	100.00	100.00
tetrapyrrole biosynthesis I (from glutamate)	27	22	11	24	21	83.33	66.67	83.33	83.33	83.33
thiamine diphosphate biosynthesis I (E. coli)	12	14	7	14	10	100.00	100.00	50.00	100.00	100.00
thiamine diphosphate biosynthesis II (Bacillus)	12	14	7	14	10	100.00	100.00	50.00	100.00	100.00
thiazole component of thiamine diphosphate biosynthesis II	28	11	23	32	20	71.43	57.14	71.43	71.43	57.14
thioredoxin pathway	4	4	9	4	7	50.00	50.00	50.00	50.00	50.00
thiosulfate disproportionation IV (rhodanese)	2	4	1	4	3	100.00	100.00	100.00	100.00	100.00
thymine degradation	124	101	108	136	132	66.67	33.33	33.33	66.67	66.67
trans, trans-farnesyl diphosphate biosynthesis	3	5	3	5	5	100.00	100.00	100.00	100.00	100.00
trehalose biosynthesis I	3	3	2	4	2	100.00	100.00	100.00	100.00	100.00
tRNA charging	210	186	161	226	185	100.00	95.24	100.00	90.48	95.24
tRNA processing	9	13	5	10	5	60.00	70.00	50.00	40.00	50.00
tRNA-uridine 2-thiolation (yeast mitochondria)	16	10	15	28	24	50.00	50.00	50.00	50.00	50.00
tRNA-uridine 2-thiolation and selenation (bacteria)	20	20	19	32	27	36.36	36.36	63.64	36.36	36.36
UDP-alpha-D-galactose biosynthesis	1	3	3	1	5	100.00	100.00	100.00	100.00	100.00
UDP-alpha-D-glucose biosynthesis I	11	22	11	23	13	100.00	100.00	100.00	100.00	100.00
UDP-alpha-D-glucuronate biosynthesis (from UDP-glucose)	12	5	9	8	15	100.00	100.00	100.00	100.00	100.00
UDP-N-acetyl-D-glucosamine biosynthesis I	44	34	32	45	26	100.00	100.00	100.00	100.00	100.00
uracil degradation I (reductive)	124	101	108	136	132	66.67	33.33	33.33	66.67	66.67
urea cycle	19	27	29	38	27	60.00	80.00	80.00	100.00	80.00
UTP and CTP de novo biosynthesis	8	8	5	7	5	66.67	66.67	66.67	66.67	66.67

## Sheet: Table VII
Supplementary Table VII. Lisf of metabolic pathways found in metagenomes from the continental slope (C1) and abyssal plain (C2). Their coverage (% from the total number of reactions) across samples is shown.
Pathway common name	Coverage (%)	Cluster
2-methylcitrate cycle II	66.67	C1
acyl-[acyl-carrier protein] thioesterase pathway	100.00	C1
anandamide degradation	100.00	C1
assimilatory sulfate reduction III	100.00	C1
cellulose and hemicellulose degradation (cellulolosome)	66.67	C1
cis-vaccenate biosynthesis	60.00	C1
conversion of succinate to propanoate	66.67	C1
dTDP-3-acetamido-alpha-D-fucose biosynthesis	60.00	C1
Entner-Doudoroff pathway III (semi-phosphorylative)	66.67	C1
formaldehyde oxidation IV (thiol-independent)	100.00	C1
glycolysis I (from glucose 6-phosphate)	83.33	C1
histamine biosynthesis	100.00	C1
inosine-5-phosphate biosynthesis I	100.00	C1
Kdo transfer to lipid IVA II (Haemophilus)	100.00	C1
L-citrulline degradation	100.00	C1
L-lysine biosynthesis I	100.00	C1
L-lysine degradation VIII	100.00	C1
L-malate degradation II	100.00	C1
malate/L-aspartate shuttle pathway	100.00	C1
mannitol degradation I	100.00	C1
N-end rule pathway I (prokaryotic)	100.00	C1
NAD/NADP-NADH/NADPH cytosolic interconversion (yeast)	80.00	C1
nitric oxide biosynthesis II (mammals)	100.00	C1
palmitate biosynthesis II (bacteria and plant cytoplasm)	74.19	C1
phosphatidylcholine biosynthesis III	60.00	C1
phosphatidylcholine biosynthesis IV	60.00	C1
phosphatidylcholine biosynthesis V	66.67	C1
protein citrullination	100.00	C1
pyrimidine ribonucleosides salvage II	100.00	C1
sucrose degradation III (sucrose invertase)	75.00	C1
sucrose degradation V (sucrose alpha-glucosidase)	60.00	C1
taurine degradation III	100.00	C1
tetrahydropteridine recycling	100.00	C1
trehalose biosynthesis IV	100.00	C1
(R)-cysteate degradation	66.67	C2
1,4-dihydroxy-6-naphthoate biosynthesis I	66.67	C2
3,8-divinyl-chlorophyllide a biosynthesis III (aerobic, light independent)	77.78	C2
5-(methoxycarbonylmethoxy)uridine biosynthesis	100.00	C2
acetate and ATP formation from acetyl-CoA I	100.00	C2
adenine and adenosine salvage I	100.00	C2
adenosine nucleotides degradation III	100.00	C2
ammonia assimilation cycle II	100.00	C2
benzoate degradation II (aerobic and anaerobic)	100.00	C2
catechol degradation to beta-ketoadipate	75.00	C2
cycloartenol biosynthesis	100.00	C2
cyclopropane fatty acid (CFA) biosynthesis	100.00	C2
cytidylyl molybdenum cofactor biosynthesis	100.00	C2
D-galactose degradation I (Leloir pathway)	80.00	C2
D-serine degradation	100.00	C2
dimethylsulfoniopropanoate degradation III (demethylation)	100.00	C2
dissimilatory sulfate reduction I (to hydrogen sufide))	75.00	C2
dissimilatory sulfate reduction II (to thiosulfate)	80.00	C2
ethanolamine utilization	60.00	C2
fluoroacetate degradation	100.00	C2
formate oxidation to CO2	100.00	C2
formate to nitrite electron transfer	66.67	C2
glycogen biosynthesis I (from ADP-D-Glucose)	75.00	C2
glycolysis III (from glucose)	72.73	C2
hydrogen oxidation II (aerobic, NAD)	100.00	C2
hydrogen production II	100.00	C2
L-alanine biosynthesis II	100.00	C2
L-alanine degradation II (to D-lactate)	66.67	C2
L-alanine degradation III	100.00	C2
L-arginine biosynthesis III (via N-acetyl-L-citrulline)	77.78	C2
L-glutamate biosynthesis I	100.00	C2
L-glutamate biosynthesis IV	100.00	C2
L-glutamate biosynthesis V	100.00	C2
L-glutamine degradation II	100.00	C2
L-methionine degradation II	100.00	C2
lipoate biosynthesis and incorporation II	100.00	C2
lipoate salvage I	100.00	C2
manganese oxidation I	100.00	C2
methanol oxidation to formaldehyde II	100.00	C2
methylamine degradation I	100.00	C2
mevalonate pathway I (eukaryotes and bacteria)	71.43	C2
N-acetylglucosamine degradation I	100.00	C2
NAD salvage pathway III (to nicotinamide riboside)	66.67	C2
nitrate reduction IV (dissimilatory)	100.00	C2
nitrite oxidation	100.00	C2
penicillin K biosynthesis	100.00	C2
putrescine biosynthesis III	100.00	C2
queuosine biosynthesis II (queuine salvage)	100.00	C2
sulfide oxidation I (to sulfur globules)	100.00	C2
sulfolactate degradation III	66.67	C2
thiamine diphosphate biosynthesis III (Staphylococcus)	66.67	C2
thiamine diphosphate salvage III	100.00	C2
